# Supplementary material
Source: Frontiers journal article supplement (https://www.frontiersin.org/articles/445304)
Supplement: Table_2.xls [file Table_2.xls]

## Sheet: M-VS-W.GeneDiffExpFilter
		Supplementar File S1 Detailed information of differential expressed genes
GeneID	Means-M	Means-W	log2FC(W/M)	Up-Down-Regulation(W/M)	FDR	length	transcript_id(s)	NR-ID	NR-Annot	KEGG-ID	KEGG-Annot	GO-BP	GO-CC	GO-MF
CGLO_02099	14.393	44.045	1.61361	Up	0.0148034	1014	EQB57739	gi|530478366|gb|EQB57739.1|	zinc-binding dehydrogenase [Colletotrichum gloeosporioides Cg-14]	bsc:COCSADRAFT_32238	hypothetical protein; K00344 NADPH2:quinone reductase [EC:1.6.5.5]	GO:0055114 oxidation-reduction process	GO:0008270 zinc ion binding | GO:0016491 oxidoreductase activity	--
CGLO_02309	533.114	1833.4	1.78201	Up	0.000303264	1476	EQB57552	gi|530478135|gb|EQB57552.1|	succinate-semialdehyde dehydrogenase [Colletotrichum gloeosporioides Cg-14]	vda:VDAG_04572	succinate-semialdehyde dehydrogenase; K00135 succinate-semialdehyde dehydrogenase / glutarate-semialdehyde dehydrogenase [EC:1.2.1.16 1.2.1.79 1.2.1.20]	GO:0009450 gamma-aminobutyric acid catabolic process | GO:0055114 oxidation-reduction process	GO:0009013 succinate-semialdehyde dehydrogenase [NAD(P)+] activity	--
CGLO_16568	7.84526	51.4679	2.71378	Up	2.00987e-06	990	EQB44655	gi|530461574|gb|EQB44655.1|	short-chain dehydrogenase [Colletotrichum gloeosporioides Cg-14]	psq:PUNSTDRAFT_55413	NAD(P)-binding protein; K11153 retinol dehydrogenase 12 [EC:1.1.1.300]	GO:0055114 oxidation-reduction process	GO:0016491 oxidoreductase activity	--
CGLO_16818	52.2906	140.039	1.4212	Up	0.000498133	1632	EQB44441	gi|530461296|gb|EQB44441.1|	prostacyclin synthase [Colletotrichum gloeosporioides Cg-14]	sla:SERLADRAFT_459654	hypothetical protein; K07430 25/26-hydroxycholesterol 7alpha-hydroxylase [EC:1.14.14.29]	GO:0055114 oxidation-reduction process	GO:0020037 heme binding | GO:0016705 oxidoreductase activity, acting on paired donors, with incorporation or reduction of molecular oxygen | GO:0004497 monooxygenase activity | GO:0005506 iron ion binding	--
CGLO_17896	33.2591	105.029	1.65897	Up	0.00817614	1017	EQB43441	gi|530460013|gb|EQB43441.1|	voltage-gated potassium channel subunit beta-2 [Colletotrichum gloeosporioides Cg-14]	aor:AOR_1_2094	AO090120000002; aryl-alcohol dehydrogenase; K17647 versiconal hemiacetal acetate reductase [EC:1.1.1.353]	--	--	--
CGLO_10345	15.402	59.7868	1.95671	Up	0.00160814	1401	EQB50226	gi|596650581|ref|XP_007273143.1|	vitamin H transporter [Colletotrichum gloeosporioides Nara gc5] >gi|429863357|gb|ELA37823.1| vitamin H transporter [Colletotrichum gloeosporioides Nara gc5]	dha:DEHA2C13816g	DEHA2C13816p; K03448 MFS transporter, ACS family, pantothenate transporter	GO:0055085 transmembrane transport	--	GO:0016021 integral component of membrane
CGLO_03156	70.6771	219.173	1.63275	Up	0.00737026	2061	EQB56810	gi|530477205|gb|EQB56810.1|	trehalase [Colletotrichum gloeosporioides Cg-14]	vda:VDAG_03038	periplasmic trehalase; K01194 alpha,alpha-trehalase [EC:3.2.1.28]	GO:0005991 trehalose metabolic process	GO:0004555 alpha,alpha-trehalase activity	--
CGLO_01048	3.82684	12.9387	1.75747	Up	0.0425549	1101	EQB58680	gi|530479503|gb|EQB58680.1|	transaldolase [Colletotrichum gloeosporioides Cg-14]	tmn:UCRPA7_2091	putative transaldolase protein; K00616 transaldolase [EC:2.2.1.2]	GO:0005975 carbohydrate metabolic process	GO:0003824 catalytic activity	--
CGLO_04557	915.352	413.88	-1.14512	Down	0.000832143	1749	EQB55514	gi|530475448|gb|EQB55514.1|	thiamine pyrophosphate enzyme [Colletotrichum gloeosporioides Cg-14]	ela:UCREL1_6617	putative pyruvate decarboxylase protein; K01568 pyruvate decarboxylase [EC:4.1.1.1]	GO:0008152 metabolic process	GO:0016831 carboxy-lyase activity | GO:0000287 magnesium ion binding | GO:0030976 thiamine pyrophosphate binding	--
CGLO_13565	1608.28	587.967	-1.45171	Down	1.0544e-06	909	EQB47304	gi|530465145|gb|EQB47304.1|	SUR7 protein [Colletotrichum gloeosporioides Cg-14]	--	--	--	--	GO:0016021 integral component of membrane | GO:0005886 plasma membrane
CGLO_13874	101.106	562.511	2.47601	Up	3.28245e-11	1263	EQB47023	gi|530464739|gb|EQB47023.1|	oxidoreductase [Colletotrichum gloeosporioides Cg-14]	pcs:Pc22g17670	Pc22g17670; K00480 salicylate hydroxylase [EC:1.14.13.1]	GO:0055114 oxidation-reduction process	GO:0071949 FAD binding | GO:0016491 oxidoreductase activity	--
CGLO_11325	61.4119	177.708	1.53292	Up	6.80307e-06	1773	EQB49351	gi|530467846|gb|EQB49351.1|	multicopper oxidase [Colletotrichum gloeosporioides Cg-14]	sla:SERLADRAFT_362730	Sllcc2; multicopper oxidase; K19791 iron transport multicopper oxidase	GO:0055114 oxidation-reduction process	GO:0016491 oxidoreductase activity | GO:0005507 copper ion binding	--
CGLO_00570	548.526	192.679	-1.50936	Down	0.0139319	2160	EQB59090	gi|530480008|gb|EQB59090.1|	subtilase [Colletotrichum gloeosporioides Cg-14]	ani:AN5558.2	similar to alkaline protease; K18549 oryzin [EC:3.4.21.63]	GO:0006508 proteolysis	GO:0004252 serine-type endopeptidase activity	GO:0016020 membrane | GO:0005618 cell wall
CGLO_12876	49.9195	13.9475	-1.8396	Down	0.00287936	1197	EQB47937	gi|530466004|gb|EQB47937.1|	subtilase [Colletotrichum gloeosporioides Cg-14]	ani:AN5558.2	similar to alkaline protease; K18549 oryzin [EC:3.4.21.63]	GO:0006508 proteolysis	GO:0004252 serine-type endopeptidase activity	--
CGLO_15528	3303.56	13327.2	2.01228	Up	0.00104995	1569	EQB45574	gi|530462735|gb|EQB45574.1|	SPFH domain/Band 7 family protein [Colletotrichum gloeosporioides Cg-14]	tmn:UCRPA7_8466	putative flotillin domain-containing protein; K07192 flotillin	--	--	--
CGLO_08466	89.8488	240.747	1.42195	Up	0.0001529	1245	EQB51940	gi|530471090|gb|EQB51940.1|	Sir2 family protein [Colletotrichum gloeosporioides Cg-14]	vda:VDAG_03453	NAD-dependent deacetylase sirtuin-7; K11417 NAD-dependent deacetylase sirtuin 7 [EC:3.5.1.-]	--	GO:0070403 NAD+ binding	--
CGLO_08352	1461.45	3834.1	1.39149	Up	2.54865e-05	1887	EQB52044	gi|530471216|gb|EQB52044.1|	multicopper oxidase [Colletotrichum gloeosporioides Cg-14]	tre:TRIREDRAFT_102820	ferroxidase-like protein; K19791 iron transport multicopper oxidase	GO:0055114 oxidation-reduction process	GO:0005507 copper ion binding | GO:0016491 oxidoreductase activity	GO:0016021 integral component of membrane
CGLO_02654	9.5077	38.7527	2.02713	Up	0.00368902	7551	EQB57236	gi|530477747|gb|EQB57236.1|	KR domain-containing protein [Colletotrichum gloeosporioides Cg-14]	ani:AN2547.2	hypothetical protein; K15419 emericellamide biosynthesis, highly reducing iterative type I polyketide synthase	GO:0055114 oxidation-reduction process	GO:0016740 transferase activity | GO:0016491 oxidoreductase activity	--
CGLO_02096	92.8379	39.8059	-1.22173	Down	0.00174946	1692	EQB57736	gi|530478363|gb|EQB57736.1|	serine carboxypeptidase S28 [Colletotrichum gloeosporioides Cg-14]	dsq:DICSQDRAFT_128566	hypothetical protein; K01285 lysosomal Pro-X carboxypeptidase [EC:3.4.16.2]	GO:0006508 proteolysis	GO:0004180 carboxypeptidase activity | GO:0008236 serine-type peptidase activity	--
CGLO_06564	53.6686	164.908	1.61951	Up	0.00111664	915	EQB53684	gi|530473212|gb|EQB53684.1|	SAM-dependent methyltransferase [Colletotrichum gloeosporioides Cg-14]	--	--	GO:0032259 methylation	GO:0008168 methyltransferase activity	--
CGLO_00999	63.1992	577.547	3.19196	Up	1.82919e-11	966	EQB58722	gi|530479551|gb|EQB58722.1|	RTA1 like protein [Colletotrichum gloeosporioides Cg-14]	--	--	GO:0006950 response to stress	--	GO:0016021 integral component of membrane
CGLO_17959	1037.45	2098.79	1.01652	Up	0.00974724	1347	EQB43382	gi|530459935|gb|EQB43382.1|	hypothetical protein CGLO_17959 [Colletotrichum gloeosporioides Cg-14]	bsc:COCSADRAFT_162163	hypothetical protein; K17877 nitrite reductase (NAD(P)H) [EC:1.7.1.4]	GO:0055114 oxidation-reduction process	GO:0016491 oxidoreductase activity	--
CGLO_01814	125.984	356.887	1.50223	Up	0.015053	801	EQB57995	gi|530478670|gb|EQB57995.1|	pyridoxamine phosphate oxidase [Colletotrichum gloeosporioides Cg-14]	--	--	--	--	GO:0016021 integral component of membrane
CGLO_15632	88.0763	43.8871	-1.00496	Down	0.0244978	675	EQB45491	gi|530462636|gb|EQB45491.1|	protein tyrosine phosphatase-like protein [Colletotrichum gloeosporioides Cg-14]	vda:VDAG_09815	hypothetical protein; K10703 very-long-chain (3R)-3-hydroxyacyl-CoA dehydratase [EC:4.2.1.134]	--	--	GO:0016021 integral component of membrane
CGLO_17923	5.56266	19.4555	1.80633	Up	0.0464005	810	EQB43420	gi|530459985|gb|EQB43420.1|	hypothetical protein CGLO_17923 [Colletotrichum gloeosporioides Cg-14]	nhe:NECHADRAFT_91296	hypothetical protein; K07005 uncharacterized protein	GO:0055114 oxidation-reduction process	GO:0016491 oxidoreductase activity | GO:0010181 FMN binding	--
CGLO_06354	116.561	50.6886	-1.20135	Down	0.0201551	1983	EQB53876	gi|530473442|gb|EQB53876.1|	Pro-kumamolisin [Colletotrichum gloeosporioides Cg-14]	tmn:UCRPA7_8582	putative subtilisin-like protein; K01279 tripeptidyl-peptidase I [EC:3.4.14.9]	GO:0006508 proteolysis	GO:0004252 serine-type endopeptidase activity	--
CGLO_01780	145.042	60.1112	-1.27076	Down	0.000310123	1035	EQB58024	gi|530478704|gb|EQB58024.1|	pirin [Colletotrichum gloeosporioides Cg-14]	tmn:UCRPA7_4829	putative pirin domain protein; K06911 uncharacterized protein	--	--	GO:0016021 integral component of membrane
CGLO_17861	12.5365	418.138	5.05978	Up	5.65044e-36	1362	EQB43482	gi|530460067|gb|EQB43482.1|	hypothetical protein CGLO_17861 [Colletotrichum gloeosporioides Cg-14]	ani:AN7355.2	hypothetical protein; K15454 tRNA pseudouridine synthase 9 [EC:5.4.99.-]	GO:0055114 oxidation-reduction process	GO:0050660 flavin adenine dinucleotide binding | GO:0016614 oxidoreductase activity, acting on CH-OH group of donors	--
CGLO_02657	6.92876	24.3296	1.81204	Up	0.0399772	1479	EQB57239	gi|530477750|gb|EQB57239.1|	peptidase family M28 [Colletotrichum gloeosporioides Cg-14]	fgr:FGSG_04246	hypothetical protein; K01264 aminopeptidase Y [EC:3.4.11.15]	GO:0006508 proteolysis	GO:0046872 metal ion binding | GO:0008233 peptidase activity	--
CGLO_06466	81.1799	164.016	1.01464	Up	0.019701	2166	EQB53785	gi|530473327|gb|EQB53785.1|	pentatricopeptide repeat domain-containing protein [Colletotrichum gloeosporioides Cg-14]	--	--	--	--	--
CGLO_04690	1269.99	427.366	-1.57127	Down	0.000618546	993	EQB55391	gi|596701718|ref|XP_007282683.1|	pectinesterase precursor [Colletotrichum gloeosporioides Nara gc5] >gi|429853183|gb|ELA28274.1| pectinesterase precursor [Colletotrichum gloeosporioides Nara gc5] >gi|530475299|gb|EQB55391.1| pectinesterase [Colletotrichum gloeosporioides Cg-14]	nhe:NECHADRAFT_106465	carbohydrate esterase family 8; K01051 pectinesterase [EC:3.1.1.11]	GO:0042545 cell wall modification | GO:0045490 pectin catabolic process	GO:0030599 pectinesterase activity | GO:0045330 aspartyl esterase activity	GO:0005618 cell wall | GO:0005576 extracellular region
CGLO_02303	34.0735	111.179	1.70616	Up	0.0333802	1143	EQB57546	gi|596683380|ref|XP_007279278.1|	pectin lyase [Colletotrichum gloeosporioides Nara gc5] >gi|429856774|gb|ELA31670.1| pectin lyase [Colletotrichum gloeosporioides Nara gc5]	vda:VDAG_07238	pectin lyase; K01732 pectin lyase [EC:4.2.2.10]	GO:0000272 polysaccharide catabolic process	GO:0047490 pectin lyase activity	GO:0005576 extracellular region
CGLO_08403	97.6045	11.1247	-3.13318	Down	3.15285e-06	1971	EQB51999	gi|530471161|gb|EQB51999.1|	PA domain-containing protein [Colletotrichum gloeosporioides Cg-14]	act:ACLA_030870	peptidase, M28 family, putative; K01301 N-acetylated-alpha-linked acidic dipeptidase [EC:3.4.17.21]	GO:0006508 proteolysis	GO:0004180 carboxypeptidase activity	--
CGLO_16794	5.64172	20.981	1.89487	Up	0.0124854	1239	EQB44455	gi|530461315|gb|EQB44455.1|	hypothetical protein CGLO_16794 [Colletotrichum gloeosporioides Cg-14]	nfi:NFIA_099780	FAD binding domain protein; K00480 salicylate hydroxylase [EC:1.14.13.1]	GO:0055114 oxidation-reduction process	GO:0071949 FAD binding | GO:0016491 oxidoreductase activity	--
CGLO_16391	272.819	1342.04	2.29841	Up	5.15638e-08	2439	EQB44813	gi|530461779|gb|EQB44813.1|	hypothetical protein CGLO_16391 [Colletotrichum gloeosporioides Cg-14]	--	--	GO:0055114 oxidation-reduction process	GO:0051213 dioxygenase activity	GO:0016020 membrane
CGLO_14796	32.2786	119.372	1.88681	Up	0.00715026	1362	EQB46178	gi|530463522|gb|EQB46178.1|	O-methyltransferase [Colletotrichum gloeosporioides Cg-14]	afv:AFLA_116210	O-methyltransferase, putative; K18280 6-hydroxytryprostatin B O-methyltransferase [EC:2.1.1.293]	GO:0032259 methylation	GO:0008171 O-methyltransferase activity	--
CGLO_01887	2.11811	7.56676	1.8369	Up	0.0457403	1248	EQB57934	gi|530478598|gb|EQB57934.1|	O-methyltransferase [Colletotrichum gloeosporioides Cg-14]	pcs:Pc18g03140	Pc18g03140; K17649 demethylsterigmatocystin 6-O-methyltransferase [EC:2.1.1.109]	GO:0032259 methylation	GO:0008171 O-methyltransferase activity	--
CGLO_13091	344.783	164.603	-1.0667	Down	0.0333802	1320	EQB47738	gi|530465748|gb|EQB47738.1|	O-methyltransferase [Colletotrichum gloeosporioides Cg-14]	abe:ARB_07989	O-methyltransferase, putative; K18280 6-hydroxytryprostatin B O-methyltransferase [EC:2.1.1.293]	GO:0032259 methylation	GO:0008171 O-methyltransferase activity	--
CGLO_02036	377.619	110.489	-1.77303	Down	0.000377255	1248	EQB57799	gi|530478434|gb|EQB57799.1|	O-methyltransferase [Colletotrichum gloeosporioides Cg-14]	ang:ANI_1_2158014	An01g00880; O-methyltransferase B; K17649 demethylsterigmatocystin 6-O-methyltransferase [EC:2.1.1.109]	GO:0032259 methylation	GO:0008171 O-methyltransferase activity	--
CGLO_03162	106.897	48.8916	-1.12856	Down	0.0147533	672	EQB56797	gi|596655660|ref|XP_007274071.1|	nucleolar protein 12 [Colletotrichum gloeosporioides Nara gc5] >gi|429862244|gb|ELA36901.1| nucleolar protein 12 [Colletotrichum gloeosporioides Nara gc5]	vda:VDAG_01420	hypothetical protein; K14851 ribosomal RNA-processing protein 17	GO:0006364 rRNA processing	--	GO:0005737 cytoplasm | GO:0005634 nucleus
CGLO_00126	84.0692	32.2617	-1.38175	Down	0.00568968	1047	EQB59482	gi|530480502|gb|EQB59482.1|	NmrA-like family protein [Colletotrichum gloeosporioides Cg-14]	ela:UCREL1_8069	putative nmral1 protein; K00140 malonate-semialdehyde dehydrogenase (acetylating) / methylmalonate-semialdehyde dehydrogenase [EC:1.2.1.18 1.2.1.27]	--	--	--
CGLO_12800	844.894	233.267	-1.85679	Down	0.0423063	900	EQB48003	gi|530466095|gb|EQB48003.1|	NmrA-like family protein [Colletotrichum gloeosporioides Cg-14]	afv:AFLA_118070	isoflavone reductase family protein (CipA), putative; K06001 tryptophan synthase beta chain [EC:4.2.1.20]	--	--	--
CGLO_13172	9.6711	29.2647	1.59741	Up	0.0113365	1611	EQB47659	gi|530465644|gb|EQB47659.1|	hypothetical protein CGLO_13172 [Colletotrichum gloeosporioides Cg-14]	pno:SNOG_00663	hypothetical protein; K01078 acid phosphatase [EC:3.1.3.2]	GO:0055114 oxidation-reduction process	GO:0020037 heme binding | GO:0016705 oxidoreductase activity, acting on paired donors, with incorporation or reduction of molecular oxygen | GO:0004497 monooxygenase activity | GO:0005506 iron ion binding	GO:0016021 integral component of membrane
CGLO_13033	5.548	39.215	2.82137	Up	1.48228e-06	936	EQB47779	gi|530465806|gb|EQB47779.1|	hypothetical protein CGLO_13033 [Colletotrichum gloeosporioides Cg-14]	--	--	GO:0055114 oxidation-reduction process	GO:0050660 flavin adenine dinucleotide binding | GO:0004499 N,N-dimethylaniline monooxygenase activity | GO:0050661 NADP binding	GO:0016021 integral component of membrane
CGLO_12976	416.564	1711.2	2.0384	Up	3.3145e-15	1551	EQB47847	gi|530465895|gb|EQB47847.1|	hypothetical protein CGLO_12976 [Colletotrichum gloeosporioides Cg-14]	pbn:PADG_02104	hypothetical protein; K00485 dimethylaniline monooxygenase (N-oxide forming) [EC:1.14.13.8]	GO:0055114 oxidation-reduction process	GO:0050660 flavin adenine dinucleotide binding | GO:0004499 N,N-dimethylaniline monooxygenase activity | GO:0050661 NADP binding	--
CGLO_17897	126.519	321.131	1.34381	Up	0.00048634	960	EQB43442	gi|530460014|gb|EQB43442.1|	NAD dependent epimerase/dehydratase [Colletotrichum gloeosporioides Cg-14]	scm:SCHCODRAFT_55766	hypothetical protein; K01784 UDP-glucose 4-epimerase [EC:5.1.3.2]	GO:0008152 metabolic process	GO:0050662 coenzyme binding | GO:0003824 catalytic activity	--
CGLO_17362	8203.65	3238.75	-1.34083	Down	0.0057203	783	EQB43927	gi|530460636|gb|EQB43927.1|	NAD dependent epimerase/dehydratase [Colletotrichum gloeosporioides Cg-14]	--	--	GO:0008152 metabolic process	GO:0050662 coenzyme binding | GO:0003824 catalytic activity	--
CGLO_13931	2351.04	852.961	-1.46275	Down	0.00250805	1065	EQB46981	gi|530464666|gb|EQB46981.1|	NAD dependent epimerase/dehydratase [Colletotrichum gloeosporioides Cg-14]	lel:LELG_04840	hypothetical protein; K17741 NADPH-dependent methylglyoxal reductase [EC:1.1.1.283]	GO:0008152 metabolic process	GO:0050662 coenzyme binding | GO:0003824 catalytic activity	--
CGLO_11348	24.1345	79.7943	1.72519	Up	0.00796288	1638	EQB49315	gi|530467805|gb|EQB49315.1|	hypothetical protein CGLO_11348 [Colletotrichum gloeosporioides Cg-14]	pte:PTT_16896	hypothetical protein; K21295 multifunctional cytochrome P450 monooxygenase	GO:0055114 oxidation-reduction process	GO:0020037 heme binding | GO:0016705 oxidoreductase activity, acting on paired donors, with incorporation or reduction of molecular oxygen | GO:0004497 monooxygenase activity | GO:0005506 iron ion binding	GO:0016021 integral component of membrane
CGLO_15720	21.9007	160.221	2.87102	Up	1.82935e-09	4278	EQB45411	gi|530462531|gb|EQB45411.1|	NACHT and TPR domain-containing protein [Colletotrichum gloeosporioides Cg-14]	--	--	--	--	--
CGLO_09792	2.15703	8.47758	1.97461	Up	0.0275341	1002	EQB50729	gi|530469613|gb|EQB50729.1|	hypothetical protein CGLO_09792 [Colletotrichum gloeosporioides Cg-14]	vda:VDAG_07909	3-hydroxyisobutyrate dehydrogenase; K00020 3-hydroxyisobutyrate dehydrogenase [EC:1.1.1.31]	GO:0055114 oxidation-reduction process	GO:0004616 phosphogluconate dehydrogenase (decarboxylating) activity | GO:0051287 NAD binding	--
CGLO_09326	61.7055	154.217	1.32149	Up	0.000715749	891	EQB51146	gi|530470121|gb|EQB51146.1|	hypothetical protein CGLO_09326 [Colletotrichum gloeosporioides Cg-14]	ela:UCREL1_11380	putative dna replication licensing factor mcm3 protein; K02541 DNA replication licensing factor MCM3 [EC:3.6.4.12]	GO:0055114 oxidation-reduction process	GO:0016491 oxidoreductase activity	--
CGLO_08999	110.465	223.131	1.01431	Up	0.0148034	675	EQB51456	gi|530470489|gb|EQB51456.1|	hypothetical protein CGLO_08999 [Colletotrichum gloeosporioides Cg-14]	pfj:MYCFIDRAFT_31273	hypothetical protein; K00275 pyridoxamine 5'-phosphate oxidase [EC:1.4.3.5]	GO:0042823 pyridoxal phosphate biosynthetic process | GO:0055114 oxidation-reduction process | GO:0008615 pyridoxine biosynthetic process	GO:0004733 pyridoxamine-phosphate oxidase activity | GO:0010181 FMN binding	--
CGLO_10962	49578.2	22420.7	-1.14488	Down	0.00737026	933	EQB49682	gi|530468268|gb|EQB49682.1|	methyltransferase [Colletotrichum gloeosporioides Cg-14]	fpu:FPSE_02859	hypothetical protein; K01426 amidase [EC:3.5.1.4]	GO:0032259 methylation	GO:0008168 methyltransferase activity	--
CGLO_12673	1623.5	709.356	-1.19452	Down	0.00368902	843	EQB48122	gi|530466259|gb|EQB48122.1|	methyltransferase [Colletotrichum gloeosporioides Cg-14]	fpu:FPSE_02859	hypothetical protein; K01426 amidase [EC:3.5.1.4]	GO:0032259 methylation	GO:0008168 methyltransferase activity	--
CGLO_05368	27.5836	74.3331	1.43019	Up	0.0197747	1257	EQB54763	gi|530474562|gb|EQB54763.1|	membrane dipeptidase [Colletotrichum gloeosporioides Cg-14]	fpu:FPSE_06964	hypothetical protein; K01273 membrane dipeptidase [EC:3.4.13.19]	GO:0006508 proteolysis	GO:0046872 metal ion binding | GO:0008237 metallopeptidase activity | GO:0016805 dipeptidase activity	--
CGLO_02944	1491.38	679.089	-1.13497	Down	0.0093473	2652	EQB56987	gi|530477430|gb|EQB56987.1|	mechanosensitive ion channel [Colletotrichum gloeosporioides Cg-14]	--	--	GO:0055085 transmembrane transport	GO:0005509 calcium ion binding	GO:0016021 integral component of membrane
CGLO_06301	377.322	146.733	-1.3626	Down	0.000538748	783	EQB53927	gi|596668695|ref|XP_007276526.1|	major facilitator superfamily transporter [Colletotrichum gloeosporioides Nara gc5] >gi|429859655|gb|ELA34430.1| major facilitator superfamily transporter [Colletotrichum gloeosporioides Nara gc5]	aor:AOR_1_1468054	AO090011000870; MFS allantoate transporter; K08192 MFS transporter, ACS family, allantoate permease	GO:0055085 transmembrane transport	--	GO:0016021 integral component of membrane
CGLO_15228	9.51057	185.233	4.28367	Up	9.8263e-21	1314	EQB45832	gi|530463058|gb|EQB45832.1|	major facilitator superfamily transporter [Colletotrichum gloeosporioides Cg-14]	pan:PODANSg1509	hypothetical protein; K17866 diphthamide biosynthesis protein 2	GO:0055085 transmembrane transport	--	GO:0016021 integral component of membrane
CGLO_06625	2.78352	45.9018	4.04357	Up	6.1559e-10	981	EQB53636	gi|530473155|gb|EQB53636.1|	major facilitator superfamily transporter [Colletotrichum gloeosporioides Cg-14]	pno:SNOG_01362	hypothetical protein; K10256 omega-6 fatty acid desaturase / acyl-lipid omega-6 desaturase (Delta-12 desaturase) [EC:1.14.19.6 1.14.19.22]	GO:0055085 transmembrane transport	GO:0005215 transporter activity	GO:0016021 integral component of membrane
CGLO_17295	3596.08	18576.8	2.36901	Up	7.74657e-12	1767	EQB43995	gi|530460718|gb|EQB43995.1|	major facilitator superfamily transporter [Colletotrichum gloeosporioides Cg-14]	gtr:GLOTRDRAFT_121064	MFS general substrate transporter; K08197 MFS transporter, SIT family, siderophore-iron:H+ symporter	GO:0055085 transmembrane transport	--	GO:0016021 integral component of membrane
CGLO_14610	43.4775	195.563	2.16929	Up	0.0050462	1554	EQB46345	gi|530463770|gb|EQB46345.1|	major facilitator superfamily transporter [Colletotrichum gloeosporioides Cg-14]	act:ACLA_080180	MFS allantoate transporter, putative; K08192 MFS transporter, ACS family, allantoate permease	GO:0055085 transmembrane transport	--	GO:0016021 integral component of membrane
CGLO_12116	117.125	512.011	2.12813	Up	9.80743e-10	1824	EQB48636	gi|530466924|gb|EQB48636.1|	major facilitator superfamily transporter [Colletotrichum gloeosporioides Cg-14]	nhe:NECHADRAFT_65858	hypothetical protein; K10866 DNA repair protein RAD50 [EC:3.6.-.-]	GO:0055085 transmembrane transport	--	GO:0016021 integral component of membrane
CGLO_03063	11.2567	43.3755	1.9461	Up	0.00989334	1620	EQB56887	gi|530477302|gb|EQB56887.1|	major facilitator superfamily transporter [Colletotrichum gloeosporioides Cg-14]	ang:ANI_1_448104	An12g03550; MFS allantoate transporter; K08192 MFS transporter, ACS family, allantoate permease	GO:0006820 anion transport | GO:0055085 transmembrane transport	GO:0022857 transmembrane transporter activity	GO:0016021 integral component of membrane
CGLO_03511	36.815	135.77	1.8828	Up	0.00294991	1572	EQB56477	gi|530476604|gb|EQB56477.1|	major facilitator superfamily transporter [Colletotrichum gloeosporioides Cg-14]	afv:AFLA_048740	MFS transporter, putative; K13336 peroxin-3	GO:0055085 transmembrane transport | GO:0006357 regulation of transcription from RNA polymerase II promoter	GO:0008270 zinc ion binding | GO:0000981 RNA polymerase II transcription factor activity, sequence-specific DNA binding | GO:0003677 DNA binding	GO:0016021 integral component of membrane | GO:0005634 nucleus
CGLO_16316	74.567	209.273	1.48878	Up	0.0102943	1527	EQB44887	gi|530461872|gb|EQB44887.1|	major facilitator superfamily transporter [Colletotrichum gloeosporioides Cg-14]	ani:AN3929.2	hypothetical protein; K11369 retrograde regulation protein 2	GO:0055085 transmembrane transport	--	GO:0016021 integral component of membrane
CGLO_05027	61.4549	160.447	1.38449	Up	0.00341657	1512	EQB55072	gi|530474917|gb|EQB55072.1|	major facilitator superfamily transporter [Colletotrichum gloeosporioides Cg-14]	aor:AOR_1_978154	AO090003000559; ccr4-Not transcription complex subunit (NOT1); K12604 CCR4-NOT transcription complex subunit 1	GO:0055085 transmembrane transport	--	GO:0016021 integral component of membrane
CGLO_03502	126.037	55.3661	-1.18677	Down	0.0379588	1743	EQB56485	gi|530476614|gb|EQB56485.1|	major facilitator superfamily transporter [Colletotrichum gloeosporioides Cg-14]	ani:AN1476.2	hypothetical protein; K08856 serine/threonine kinase 16 [EC:2.7.11.1]	GO:0055085 transmembrane transport	--	GO:0016021 integral component of membrane
CGLO_04933	371.691	160.555	-1.21103	Down	0.00464287	1758	EQB55156	gi|530475016|gb|EQB55156.1|	major facilitator superfamily transporter [Colletotrichum gloeosporioides Cg-14]	afv:AFLA_061480	tetracycline-efflux transporter, putative; K01772 protoporphyrin/coproporphyrin ferrochelatase [EC:4.99.1.1 4.99.1.9]	GO:0055085 transmembrane transport	GO:0005215 transporter activity	GO:0000329 fungal-type vacuole membrane | GO:0005794 Golgi apparatus | GO:0016021 integral component of membrane
CGLO_07786	39.3111	16.3464	-1.26597	Down	0.048339	1488	EQB52584	gi|530471868|gb|EQB52584.1|	major facilitator superfamily transporter [Colletotrichum gloeosporioides Cg-14]	yli:YALI0D13970g	YALI0D13970p; K08192 MFS transporter, ACS family, allantoate permease	GO:0055085 transmembrane transport	--	GO:0016021 integral component of membrane
CGLO_02777	17400.8	7041.12	-1.30527	Down	0.00354656	1803	EQB57140	gi|530477626|gb|EQB57140.1|	major facilitator superfamily transporter [Colletotrichum gloeosporioides Cg-14]	ssl:SS1G_02048	hypothetical protein; K08157 MFS transporter, DHA1 family, multidrug resistance protein	GO:0055085 transmembrane transport	--	GO:0016021 integral component of membrane
CGLO_17434	390.931	142.351	-1.45746	Down	0.000497046	1317	EQB43875	gi|530460577|gb|EQB43875.1|	major facilitator superfamily transporter [Colletotrichum gloeosporioides Cg-14]	maw:MAC_02856	putative translation releasing factor RF-1; K02835 peptide chain release factor 1	GO:0055085 transmembrane transport	--	GO:0016021 integral component of membrane
CGLO_13035	113.789	38.1899	-1.5751	Down	0.000587895	1473	EQB47781	gi|530465808|gb|EQB47781.1|	major facilitator superfamily transporter [Colletotrichum gloeosporioides Cg-14]	afv:AFLA_048740	MFS transporter, putative; K13336 peroxin-3	GO:0055085 transmembrane transport	--	GO:0016021 integral component of membrane
CGLO_02925	30.3533	8.48334	-1.83915	Down	0.00577007	333	EQB57009	gi|530477458|gb|EQB57009.1|	major facilitator superfamily transporter [Colletotrichum gloeosporioides Cg-14]	ctp:CTRG_02527	similar to potential allantoate permease; K08192 MFS transporter, ACS family, allantoate permease	GO:0055085 transmembrane transport	--	GO:0016021 integral component of membrane
CGLO_17173	976.804	210.564	-2.21381	Down	1.0594e-16	1632	EQB44112	gi|530460877|gb|EQB44112.1|	major facilitator superfamily transporter [Colletotrichum gloeosporioides Cg-14]	npa:UCRNP2_7395	putative peptidyl-prolyl cis-trans isomerase protein; K05864 peptidyl-prolyl isomerase D [EC:5.2.1.8]	GO:0055085 transmembrane transport	--	GO:0016021 integral component of membrane
CGLO_16529	407.407	77.8615	-2.38749	Down	0.00368902	1578	EQB44685	gi|530461614|gb|EQB44685.1|	major facilitator superfamily transporter [Colletotrichum gloeosporioides Cg-14]	aor:AOR_1_1468054	AO090011000870; MFS allantoate transporter; K08192 MFS transporter, ACS family, allantoate permease	GO:0055085 transmembrane transport	--	GO:0016021 integral component of membrane
CGLO_01692	505.952	55.7992	-3.18069	Down	4.9277e-21	720	EQB58097	gi|530478791|gb|EQB58097.1|	major facilitator superfamily transporter [Colletotrichum gloeosporioides Cg-14]	afv:AFLA_108960	bifunctional pyrimidine biosynthesis protein (PyrABCN), putative; K11541 carbamoyl-phosphate synthase / aspartate carbamoyltransferase [EC:6.3.5.5 2.1.3.2]	GO:0055085 transmembrane transport	--	GO:0016021 integral component of membrane | GO:0005783 endoplasmic reticulum
CGLO_09437	3.86515	61.9888	4.00341	Up	6.1559e-10	1056	EQB51068	gi|530470019|gb|EQB51068.1|	longiborneol synthase [Colletotrichum gloeosporioides Cg-14]	--	--	GO:0016106 sesquiterpenoid biosynthetic process	GO:0045482 trichodiene synthase activity	--
CGLO_02237	109.228	3254.76	4.89713	Up	1.36075e-37	1005	EQB57610	gi|596655761|ref|XP_007274091.1|	lipase 2 [Colletotrichum gloeosporioides Nara gc5] >gi|429862192|gb|ELA36850.1| lipase 2 [Colletotrichum gloeosporioides Nara gc5]	ztr:MYCGRDRAFT_77854	hypothetical protein; K17648 versiconal hemiacetal acetate esterase [EC:3.1.1.94]	GO:0008152 metabolic process	GO:0016787 hydrolase activity	--
CGLO_00802	406.887	184.432	-1.14154	Down	0.00122115	1017	EQB58873	gi|530479738|gb|EQB58873.1|	lipase [Colletotrichum gloeosporioides Cg-14]	afm:AFUA_5G02040	extracellular lipase; K01046 triacylglycerol lipase [EC:3.1.1.3]	GO:0006629 lipid metabolic process	GO:0016787 hydrolase activity	--
CGLO_08441	6.52277	37.3284	2.51672	Up	0.000803985	966	EQB51967	gi|530471122|gb|EQB51967.1|	hypothetical protein CGLO_08441 [Colletotrichum gloeosporioides Cg-14]	psq:PUNSTDRAFT_55413	NAD(P)-binding protein; K11153 retinol dehydrogenase 12 [EC:1.1.1.300]	GO:0055114 oxidation-reduction process	GO:0016491 oxidoreductase activity	--
CGLO_15137	16.1872	154.709	3.25664	Up	4.18868e-17	1914	EQB45912	gi|530463165|gb|EQB45912.1|	kelch repeat protein [Colletotrichum gloeosporioides Cg-14]	--	--	--	--	GO:0016021 integral component of membrane
CGLO_06688	413.813	102.742	-2.00996	Down	0.000670859	729	EQB53570	gi|530473081|gb|EQB53570.1|	isoprenylcysteine carboxyl methyltransferase [Colletotrichum gloeosporioides Cg-14]	--	--	GO:0006481 C-terminal protein methylation	GO:0004671 protein C-terminal S-isoprenylcysteine carboxyl O-methyltransferase activity	GO:0005789 endoplasmic reticulum membrane | GO:0016021 integral component of membrane
CGLO_08351	2539.18	6334.49	1.31886	Up	0.00573351	1107	EQB52043	gi|530471215|gb|EQB52043.1|	iron permease FTR1 family protein [Colletotrichum gloeosporioides Cg-14]	maj:MAA_08848	Iron permease FTR1; K07243 high-affinity iron transporter	GO:0006827 high-affinity iron ion transmembrane transport	GO:0005381 iron ion transmembrane transporter activity	GO:0016021 integral component of membrane | GO:0033573 high-affinity iron permease complex
CGLO_00068	72.9252	23.0355	-1.66256	Down	0.0373366	1113	EQB59526	gi|530480560|gb|EQB59526.1|	integral membrane protein DUF6 [Colletotrichum gloeosporioides Cg-14]	cmt:CCM_04585	AAA family ATPase Pontin, putative; K04499 RuvB-like protein 1 (pontin 52)	--	--	GO:0016021 integral component of membrane
CGLO_04889	39.6715	177.321	2.16019	Up	0.000394677	4113	EQB55208	gi|530475078|gb|EQB55208.1|	integral membrane protein [Colletotrichum gloeosporioides Cg-14]	--	--	--	GO:0008270 zinc ion binding	--
CGLO_17701	152.56	62.9187	-1.27782	Down	0.00889442	945	EQB43612	gi|530460242|gb|EQB43612.1|	integral membrane protein [Colletotrichum gloeosporioides Cg-14]	ani:AN9039.2	hypothetical protein; K01613 phosphatidylserine decarboxylase [EC:4.1.1.65]	--	--	GO:0016021 integral component of membrane
CGLO_17253	220.099	72.0024	-1.61203	Down	0.0125856	1224	EQB44039	gi|530460781|gb|EQB44039.1|	integral membrane protein [Colletotrichum gloeosporioides Cg-14]	cmt:CCM_02900	short-chain dehydrogenase, putative; K06123 1-acylglycerone phosphate reductase [EC:1.1.1.101]	--	--	GO:0016021 integral component of membrane
CGLO_02035	536.305	129.459	-2.05055	Down	1.22045e-05	1176	EQB57798	gi|530478433|gb|EQB57798.1|	integral membrane protein [Colletotrichum gloeosporioides Cg-14]	ani:AN9039.2	hypothetical protein; K01613 phosphatidylserine decarboxylase [EC:4.1.1.65]	--	--	GO:0016021 integral component of membrane
CGLO_07656	2958.52	80.5965	-5.19801	Down	1.19778e-31	1530	EQB52699	gi|530472012|gb|EQB52699.1|	integral membrane protein [Colletotrichum gloeosporioides Cg-14]	fpu:FPSE_06903	hypothetical protein; K08770 ubiquitin C	--	--	--
CGLO_16143	28.6126	89.8982	1.65164	Up	0.00424437	1362	EQB45034	gi|530462054|gb|EQB45034.1|	initiator tRNA phosphoribosyl transferase [Colletotrichum gloeosporioides Cg-14]	nte:NEUTE1DRAFT120231	NEUTE1DRAFT_120231; hypothetical protein; K15463 tRNA A64-2'-O-ribosylphosphate transferase [EC:2.4.2.-]	GO:0019988 charged-tRNA amino acid modification	GO:0043399 tRNA A64-2'-O-ribosylphosphate transferase activity	GO:0005634 nucleus | GO:0005829 cytosol
CGLO_18374	353.349	1816.67	2.36213	Up	1.7416e-09	1707	EQB43056	gi|530459391|gb|EQB43056.1|	hypothetical protein CGLO_18374 [Colletotrichum gloeosporioides Cg-14]	--	--	GO:0008152 metabolic process	GO:0016747 transferase activity, transferring acyl groups other than amino-acyl groups	--
CGLO_18326	606.637	276.077	-1.13576	Down	0.00368902	1080	EQB43082	gi|530459434|gb|EQB43082.1|	hypothetical protein CGLO_18326 [Colletotrichum gloeosporioides Cg-14]	fgr:FGSG_08775	hypothetical protein; K20793 N-alpha-acetyltransferase 50 [EC:2.3.1.258]	GO:0008152 metabolic process	GO:0008080 N-acetyltransferase activity	--
CGLO_18193	350.435	154.608	-1.18053	Down	0.012837	3219	EQB43180	gi|530459611|gb|EQB43180.1|	hypothetical protein CGLO_18193 [Colletotrichum gloeosporioides Cg-14]	--	--	GO:0006508 proteolysis	GO:0004252 serine-type endopeptidase activity	--
CGLO_18089	19.1083	4.28687	-2.1562	Down	0.0120909	1191	EQB43278	gi|530459766|gb|EQB43278.1|	hypothetical protein CGLO_18089 [Colletotrichum gloeosporioides Cg-14]	--	--	--	--	--
CGLO_08202	26.9543	60.8985	1.17589	Up	0.0485785	852	EQB52194	gi|530471407|gb|EQB52194.1|	hypothetical protein CGLO_08202 [Colletotrichum gloeosporioides Cg-14]	wic:J056_003684	D-arabinitol 2-dehydrogenase; K17742 sorbose reductase [EC:1.1.1.289]	GO:0055114 oxidation-reduction process	GO:0016491 oxidoreductase activity	--
CGLO_06779	1153.2	2979.68	1.36951	Up	0.00732768	2577	EQB53489	gi|530472988|gb|EQB53489.1|	hypothetical protein CGLO_06779 [Colletotrichum gloeosporioides Cg-14]	mgr:MGG_16917	hypothetical protein; K21294 gliotoxin biosynthesis cytochrome P450 monooxygenase	GO:0032259 methylation | GO:0055114 oxidation-reduction process	GO:0020037 heme binding | GO:0016705 oxidoreductase activity, acting on paired donors, with incorporation or reduction of molecular oxygen | GO:0005506 iron ion binding | GO:0008171 O-methyltransferase activity	--
CGLO_06736	16.339	53.5718	1.71316	Up	0.000977107	1104	EQB53544	gi|530473047|gb|EQB53544.1|	hypothetical protein CGLO_06736 [Colletotrichum gloeosporioides Cg-14]	psq:PUNSTDRAFT_55413	NAD(P)-binding protein; K11153 retinol dehydrogenase 12 [EC:1.1.1.300]	GO:0055114 oxidation-reduction process	GO:0016491 oxidoreductase activity	--
CGLO_17884	11.2089	100.995	3.17156	Up	3.42344e-13	1266	EQB43454	gi|530460030|gb|EQB43454.1|	hypothetical protein CGLO_17884 [Colletotrichum gloeosporioides Cg-14]	--	--	--	--	--
CGLO_06735	45.534	129.252	1.50517	Up	0.00104393	906	EQB53543	gi|530473046|gb|EQB53543.1|	hypothetical protein CGLO_06735 [Colletotrichum gloeosporioides Cg-14]	pte:PTT_19016	hypothetical protein; K18693 diacylglycerol diphosphate phosphatase / phosphatidate phosphatase [EC:3.1.3.81 3.1.3.4]	GO:0055114 oxidation-reduction process	GO:0016491 oxidoreductase activity	--
CGLO_17760	31.8624	5.81729	-2.45343	Down	6.65267e-05	963	EQB43571	gi|530460188|gb|EQB43571.1|	hypothetical protein CGLO_17760 [Colletotrichum gloeosporioides Cg-14]	--	--	GO:0046373 L-arabinose metabolic process	GO:0046556 alpha-L-arabinofuranosidase activity	--
CGLO_17679	56.9746	18.1715	-1.64864	Down	0.0436154	1212	EQB43648	gi|530460286|gb|EQB43648.1|	hypothetical protein CGLO_17679 [Colletotrichum gloeosporioides Cg-14]	maj:MAA_10087	delta(24)-sterol C-methyltransferase; K00559 sterol 24-C-methyltransferase [EC:2.1.1.41]	GO:0032259 methylation | GO:0016126 sterol biosynthetic process	GO:0003838 sterol 24-C-methyltransferase activity	--
CGLO_17625	34.107	81.3354	1.25382	Up	0.0259886	1563	EQB43686	gi|530460342|gb|EQB43686.1|	hypothetical protein CGLO_17625 [Colletotrichum gloeosporioides Cg-14]	--	--	--	--	--
CGLO_17607	251.538	88.141	-1.51289	Down	0.00246981	2124	EQB43717	gi|530460381|gb|EQB43717.1|	hypothetical protein CGLO_17607 [Colletotrichum gloeosporioides Cg-14]	ani:AN1180.2	hypothetical protein; K11230 mitogen-activated protein kinase kinase kinase [EC:2.7.11.25]	GO:0006357 regulation of transcription from RNA polymerase II promoter	GO:0008270 zinc ion binding | GO:0000981 RNA polymerase II transcription factor activity, sequence-specific DNA binding | GO:0003677 DNA binding	GO:0005634 nucleus
CGLO_17576	705.878	1879.42	1.4128	Up	0.014749	1494	EQB43734	gi|530460404|gb|EQB43734.1|	hypothetical protein CGLO_17576 [Colletotrichum gloeosporioides Cg-14]	ela:UCREL1_8805	putative general substrate transporter protein; K01487 guanine deaminase [EC:3.5.4.3]	GO:0055085 transmembrane transport	GO:0022891 substrate-specific transmembrane transporter activity	GO:0016021 integral component of membrane
CGLO_17548	8.11892	23.6467	1.54228	Up	0.0307896	549	EQB43767	gi|530460444|gb|EQB43767.1|	hypothetical protein CGLO_17548 [Colletotrichum gloeosporioides Cg-14]	--	--	--	--	GO:0016021 integral component of membrane
CGLO_17495	53.9776	410.571	2.9272	Up	6.31812e-09	729	EQB43790	gi|530460478|gb|EQB43790.1|	hypothetical protein CGLO_17495 [Colletotrichum gloeosporioides Cg-14]	nhe:NECHADRAFT_84117	hypothetical protein; K01759 lactoylglutathione lyase [EC:4.4.1.5]	GO:0008152 metabolic process	GO:0016829 lyase activity	--
CGLO_17470	368.404	177.808	-1.05097	Down	0.00824267	2445	EQB43836	gi|530460530|gb|EQB43836.1|	hypothetical protein CGLO_17470 [Colletotrichum gloeosporioides Cg-14]	maj:MAA_07739	glycoside hydrolase family 16; K03380 phenol 2-monooxygenase [EC:1.14.13.7]	GO:0006355 regulation of transcription, DNA-templated	GO:0008270 zinc ion binding | GO:0003677 DNA binding	GO:0005634 nucleus
CGLO_17387	2.2587	21.3052	3.23764	Up	6.6693e-06	531	EQB43908	gi|530460615|gb|EQB43908.1|	hypothetical protein CGLO_17387 [Colletotrichum gloeosporioides Cg-14]	cmt:CCM_09279	cupin superfamily protein; K09705 uncharacterized protein	--	--	--
CGLO_17385	16.5789	53.0811	1.67885	Up	0.0118363	1314	EQB43906	gi|530460613|gb|EQB43906.1|	hypothetical protein CGLO_17385 [Colletotrichum gloeosporioides Cg-14]	--	--	--	--	--
CGLO_17296	101.348	372.81	1.87913	Up	2.46431e-05	1140	EQB43996	gi|530460719|gb|EQB43996.1|	hypothetical protein CGLO_17296 [Colletotrichum gloeosporioides Cg-14]	pte:PTT_20299	hypothetical protein; K15532 unsaturated rhamnogalacturonyl hydrolase [EC:3.2.1.172]	GO:0008152 metabolic process	GO:0016787 hydrolase activity	--
CGLO_17203	243.702	29.8558	-3.02904	Down	7.0338e-07	1407	EQB44078	gi|530460829|gb|EQB44078.1|	hypothetical protein CGLO_17203 [Colletotrichum gloeosporioides Cg-14]	pfj:MYCFIDRAFT_135682	hypothetical protein; K19519 transforming growth factor-beta-induced protein	--	--	--
CGLO_17116	23.4152	7.03603	-1.73461	Down	0.015202	1884	EQB44160	gi|530460936|gb|EQB44160.1|	hypothetical protein CGLO_17116 [Colletotrichum gloeosporioides Cg-14]	--	--	--	--	GO:0016021 integral component of membrane
CGLO_16963	130.825	294.614	1.17119	Up	0.00115948	1029	EQB44306	gi|530461122|gb|EQB44306.1|	hypothetical protein CGLO_16963 [Colletotrichum gloeosporioides Cg-14]	--	--	--	--	--
CGLO_16910	49.4282	16.0633	-1.62157	Down	0.0025689	771	EQB44359	gi|530461189|gb|EQB44359.1|	hypothetical protein CGLO_16910 [Colletotrichum gloeosporioides Cg-14]	--	--	--	--	--
CGLO_16893	515.586	250.089	-1.04377	Down	0.0158528	1500	EQB44367	gi|530461199|gb|EQB44367.1|	hypothetical protein CGLO_16893 [Colletotrichum gloeosporioides Cg-14]	--	--	GO:0009058 biosynthetic process	GO:0030170 pyridoxal phosphate binding | GO:0008483 transaminase activity	--
CGLO_16852	189.431	94.4885	-1.00346	Down	0.0206575	870	EQB44408	gi|530461253|gb|EQB44408.1|	hypothetical protein CGLO_16852 [Colletotrichum gloeosporioides Cg-14]	vda:VDAG_00198	Atg2p; K17906 autophagy-related protein 2	GO:0044712 single-organism catabolic process | GO:1902589 single-organism organelle organization | GO:0044804 nucleophagy	--	GO:0019898 extrinsic component of membrane | GO:0000407 pre-autophagosomal structure
CGLO_16848	537.295	1742.77	1.6976	Up	6.86835e-10	2394	EQB44418	gi|530461265|gb|EQB44418.1|	hypothetical protein CGLO_16848 [Colletotrichum gloeosporioides Cg-14]	ure:UREG_06498	hypothetical protein; K15385 aspyridone synthetase trans-acting enoyl reductase	GO:0006357 regulation of transcription from RNA polymerase II promoter	GO:0008270 zinc ion binding | GO:0000981 RNA polymerase II transcription factor activity, sequence-specific DNA binding | GO:0003677 DNA binding	GO:0005634 nucleus
CGLO_16846	3.25663	13.9453	2.09833	Up	0.00924645	1776	EQB44416	gi|530461263|gb|EQB44416.1|	hypothetical protein CGLO_16846 [Colletotrichum gloeosporioides Cg-14]	--	--	--	--	--
CGLO_16845	5.74607	23.5132	2.03282	Up	0.00482335	3150	EQB44415	gi|530461262|gb|EQB44415.1|	hypothetical protein CGLO_16845 [Colletotrichum gloeosporioides Cg-14]	ela:UCREL1_1375	putative myosin-5 protein; K10356 myosin I	GO:0006357 regulation of transcription from RNA polymerase II promoter	GO:0008270 zinc ion binding | GO:0003676 nucleic acid binding | GO:0000981 RNA polymerase II transcription factor activity, sequence-specific DNA binding	GO:0005634 nucleus
CGLO_16810	22.4847	53.8498	1.26	Up	0.0444683	984	EQB44443	gi|530461299|gb|EQB44443.1|	hypothetical protein CGLO_16810 [Colletotrichum gloeosporioides Cg-14]	--	--	GO:0008152 metabolic process	GO:0016787 hydrolase activity	--
CGLO_06566	803.719	1686.65	1.0694	Up	0.0124854	1254	EQB53686	gi|530473214|gb|EQB53686.1|	hypothetical protein CGLO_06566 [Colletotrichum gloeosporioides Cg-14]	--	--	GO:0055114 oxidation-reduction process	GO:0016491 oxidoreductase activity	--
CGLO_16777	108.962	382.934	1.81327	Up	1.40689e-09	2709	EQB44486	gi|530461352|gb|EQB44486.1|	hypothetical protein CGLO_16777 [Colletotrichum gloeosporioides Cg-14]	fpu:FPSE_08102	hypothetical protein; K01930 folylpolyglutamate synthase [EC:6.3.2.17]	--	--	--
CGLO_16733	5.78461	28.2464	2.28777	Up	0.000599279	471	EQB44513	gi|530461389|gb|EQB44513.1|	hypothetical protein CGLO_16733 [Colletotrichum gloeosporioides Cg-14]	--	--	--	--	--
CGLO_16616	619.344	221.163	-1.48563	Down	6.65267e-05	2001	EQB44619	gi|530461529|gb|EQB44619.1|	hypothetical protein CGLO_16616 [Colletotrichum gloeosporioides Cg-14]	maj:MAA_07124	Peptidase S33 tripeptidyl aminopeptidase-like protein; K08329 autophagy-related protein 17	--	--	GO:0016021 integral component of membrane
CGLO_16573	5.86379	38.5618	2.71727	Up	4.56816e-05	450	EQB44660	gi|530461579|gb|EQB44660.1|	hypothetical protein CGLO_16573 [Colletotrichum gloeosporioides Cg-14]	cmt:CCM_04640	beta-mannosidase mndA; K01192 beta-mannosidase [EC:3.2.1.25]	--	--	GO:0016021 integral component of membrane
CGLO_16542	8.78829	24.7309	1.49266	Up	0.0465013	465	EQB44679	gi|530461606|gb|EQB44679.1|	hypothetical protein CGLO_16542 [Colletotrichum gloeosporioides Cg-14]	--	--	--	--	GO:0016021 integral component of membrane
CGLO_05824	13.1317	45.2962	1.78633	Up	0.0087331	783	EQB54356	gi|530474050|gb|EQB54356.1|	hypothetical protein CGLO_05824 [Colletotrichum gloeosporioides Cg-14]	nhe:NECHADRAFT_56259	hypothetical protein; K00059 3-oxoacyl-[acyl-carrier protein] reductase [EC:1.1.1.100]	GO:0055114 oxidation-reduction process	GO:0016491 oxidoreductase activity	--
CGLO_16501	54.3442	8.72695	-2.63858	Down	0.000280022	1578	EQB44722	gi|530461657|gb|EQB44722.1|	hypothetical protein CGLO_16501 [Colletotrichum gloeosporioides Cg-14]	ang:ANI_1_448104	An12g03550; MFS allantoate transporter; K08192 MFS transporter, ACS family, allantoate permease	GO:0055085 transmembrane transport	--	GO:0016021 integral component of membrane
CGLO_16475	6.09089	18.8954	1.63331	Up	0.0439421	855	EQB44744	gi|530461688|gb|EQB44744.1|	hypothetical protein CGLO_16475 [Colletotrichum gloeosporioides Cg-14]	--	--	--	--	GO:0016021 integral component of membrane
CGLO_16470	28.3249	8.65302	-1.7108	Down	0.0200793	1194	EQB44748	gi|530461695|gb|EQB44748.1|	hypothetical protein CGLO_16470 [Colletotrichum gloeosporioides Cg-14]	--	--	--	--	--
CGLO_05476	2.66176	25.8388	3.27909	Up	2.09869e-06	1077	EQB54656	gi|530474428|gb|EQB54656.1|	hypothetical protein CGLO_05476 [Colletotrichum gloeosporioides Cg-14]	--	--	GO:0055114 oxidation-reduction process	GO:0016491 oxidoreductase activity	--
CGLO_04455	14.922	49.0199	1.71592	Up	0.0221318	1599	EQB55589	gi|530475546|gb|EQB55589.1|	hypothetical protein CGLO_04455 [Colletotrichum gloeosporioides Cg-14]	pno:SNOG_00663	hypothetical protein; K01078 acid phosphatase [EC:3.1.3.2]	GO:0055114 oxidation-reduction process	GO:0020037 heme binding | GO:0016705 oxidoreductase activity, acting on paired donors, with incorporation or reduction of molecular oxygen | GO:0004497 monooxygenase activity | GO:0005506 iron ion binding	GO:0016021 integral component of membrane
CGLO_04207	2.90615	20.5723	2.82352	Up	9.48331e-05	1149	EQB55822	gi|530475817|gb|EQB55822.1|	hypothetical protein CGLO_04207 [Colletotrichum gloeosporioides Cg-14]	bsc:COCSADRAFT_107681	hypothetical protein; K00505 tyrosinase [EC:1.14.18.1]	GO:0055114 oxidation-reduction process	GO:0046872 metal ion binding | GO:0016491 oxidoreductase activity	--
CGLO_16302	166.659	389.193	1.22359	Up	0.0139027	369	EQB44903	gi|530461891|gb|EQB44903.1|	hypothetical protein CGLO_16302 [Colletotrichum gloeosporioides Cg-14]	--	--	--	--	--
CGLO_16220	2934.97	1440.17	-1.0271	Down	0.00160814	1140	EQB44972	gi|530461980|gb|EQB44972.1|	hypothetical protein CGLO_16220 [Colletotrichum gloeosporioides Cg-14]	--	--	--	--	GO:0016021 integral component of membrane
CGLO_16201	25.5998	6.31283	-2.01977	Down	0.00799014	1710	EQB44993	gi|530462006|gb|EQB44993.1|	hypothetical protein CGLO_16201 [Colletotrichum gloeosporioides Cg-14]	--	--	--	--	GO:0016021 integral component of membrane
CGLO_16097	145.562	54.1451	-1.42673	Down	0.00717631	909	EQB45083	gi|530462115|gb|EQB45083.1|	hypothetical protein CGLO_16097 [Colletotrichum gloeosporioides Cg-14]	afv:AFLA_118070	isoflavone reductase family protein (CipA), putative; K06001 tryptophan synthase beta chain [EC:4.2.1.20]	--	--	--
CGLO_16092	2.7841	14.0105	2.33123	Up	0.0039242	1866	EQB45086	gi|530462119|gb|EQB45086.1|	hypothetical protein CGLO_16092 [Colletotrichum gloeosporioides Cg-14]	--	--	--	--	--
CGLO_16071	22.6762	81.8869	1.85245	Up	0.00116687	1527	EQB45116	gi|530462154|gb|EQB45116.1|	hypothetical protein CGLO_16071 [Colletotrichum gloeosporioides Cg-14]	--	--	GO:0008152 metabolic process	GO:0016747 transferase activity, transferring acyl groups other than amino-acyl groups	--
CGLO_16049	905.728	288.365	-1.65118	Down	0.000808631	1008	EQB45123	gi|530462164|gb|EQB45123.1|	hypothetical protein CGLO_16049 [Colletotrichum gloeosporioides Cg-14]	--	--	--	--	--
CGLO_16040	457.049	150.13	-1.60613	Down	0.00875324	1419	EQB45127	gi|530462171|gb|EQB45127.1|	hypothetical protein CGLO_16040 [Colletotrichum gloeosporioides Cg-14]	--	--	--	--	--
CGLO_16000	18.2041	54.1149	1.57176	Up	0.0363555	1422	EQB45159	gi|530462209|gb|EQB45159.1|	hypothetical protein CGLO_16000 [Colletotrichum gloeosporioides Cg-14]	--	--	GO:0030001 metal ion transport | GO:0055085 transmembrane transport	GO:0046873 metal ion transmembrane transporter activity	GO:0016021 integral component of membrane
CGLO_15990	40.3558	16.8047	-1.26391	Down	0.0320638	1323	EQB45182	gi|530462233|gb|EQB45182.1|	hypothetical protein CGLO_15990 [Colletotrichum gloeosporioides Cg-14]	--	--	--	--	--
CGLO_15827	17.3035	49.3357	1.51157	Up	0.00368902	2265	EQB45312	gi|530462406|gb|EQB45312.1|	hypothetical protein CGLO_15827 [Colletotrichum gloeosporioides Cg-14]	--	--	--	--	--
CGLO_15771	97.9584	27.2108	-1.84799	Down	0.0077227	4329	EQB45370	gi|530462477|gb|EQB45370.1|	hypothetical protein CGLO_15771 [Colletotrichum gloeosporioides Cg-14]	--	--	--	--	--
CGLO_15625	536.775	245.132	-1.13076	Down	0.0035524	885	EQB45506	gi|530462652|gb|EQB45506.1|	hypothetical protein CGLO_15625 [Colletotrichum gloeosporioides Cg-14]	--	--	GO:0006508 proteolysis	GO:0008237 metallopeptidase activity	GO:0000324 fungal-type vacuole | GO:0009277 fungal-type cell wall
CGLO_15583	56.11	210.874	1.91005	Up	4.74933e-08	2274	EQB45532	gi|530462684|gb|EQB45532.1|	hypothetical protein CGLO_15583 [Colletotrichum gloeosporioides Cg-14]	mbe:MBM_04883	phospho-2-dehydro-3-deoxyheptonate aldolase; K01626 3-deoxy-7-phosphoheptulonate synthase [EC:2.5.1.54]	--	--	GO:0016021 integral component of membrane
CGLO_15553	75.4955	28.2996	-1.41561	Down	0.0393352	1035	EQB45557	gi|530462713|gb|EQB45557.1|	hypothetical protein CGLO_15553 [Colletotrichum gloeosporioides Cg-14]	val:VDBG_06142	2-isopropylmalate synthase; K01649 2-isopropylmalate synthase [EC:2.3.3.13]	GO:0009098 leucine biosynthetic process	GO:0003852 2-isopropylmalate synthase activity	--
CGLO_15347	34.787	12.1665	-1.51564	Down	0.0219697	1104	EQB45739	gi|530462935|gb|EQB45739.1|	hypothetical protein CGLO_15347 [Colletotrichum gloeosporioides Cg-14]	aor:AOR_1_60154	AO090003000032; hypothetical protein; K00108 choline dehydrogenase [EC:1.1.99.1]	--	--	GO:0016021 integral component of membrane
CGLO_15346	110.393	34.4435	-1.68034	Down	0.00123322	1248	EQB45742	gi|530462939|gb|EQB45742.1|	hypothetical protein CGLO_15346 [Colletotrichum gloeosporioides Cg-14]	mrr:Moror_12493	endoglucanase ii; K19356 cellulase [EC:3.2.1.4]	--	--	--
CGLO_15335	79.6806	201.501	1.33849	Up	0.00554767	621	EQB45752	gi|530462952|gb|EQB45752.1|	hypothetical protein CGLO_15335 [Colletotrichum gloeosporioides Cg-14]	maw:MAC_06014	methionyl-tRNA synthetase; K01874 methionyl-tRNA synthetase [EC:6.1.1.10]	--	--	GO:0016021 integral component of membrane
CGLO_15233	74.7581	165.177	1.14371	Up	0.0176841	1770	EQB45837	gi|530463063|gb|EQB45837.1|	hypothetical protein CGLO_15233 [Colletotrichum gloeosporioides Cg-14]	kla:KLLA0B07579g	hypothetical protein; K03114 mitosis inhibitor protein kinase SWE1 [EC:2.7.11.1]	GO:0006468 protein phosphorylation	GO:0004672 protein kinase activity | GO:0005524 ATP binding	--
CGLO_15173	14.9089	46.5217	1.64173	Up	0.00304213	2595	EQB45880	gi|530463123|gb|EQB45880.1|	hypothetical protein CGLO_15173 [Colletotrichum gloeosporioides Cg-14]	--	--	--	--	--
CGLO_14824	36.8187	5.85443	-2.65284	Down	0.000241005	372	EQB46157	gi|530463491|gb|EQB46157.1|	hypothetical protein CGLO_14824 [Colletotrichum gloeosporioides Cg-14]	--	--	--	--	GO:0016021 integral component of membrane
CGLO_14549	5.25709	19.1243	1.86307	Up	0.0181158	720	EQB46402	gi|530463848|gb|EQB46402.1|	hypothetical protein CGLO_14549 [Colletotrichum gloeosporioides Cg-14]	--	--	GO:0008152 metabolic process	GO:0016740 transferase activity	--
CGLO_14429	106.895	41.942	-1.34973	Down	0.0201246	1182	EQB46517	gi|530464012|gb|EQB46517.1|	hypothetical protein CGLO_14429 [Colletotrichum gloeosporioides Cg-14]	afm:AFUA_5G03770	lipase; K01046 triacylglycerol lipase [EC:3.1.1.3]	GO:0008152 metabolic process	GO:0016787 hydrolase activity	--
CGLO_14393	82.3244	208.003	1.33721	Up	0.00105354	714	EQB46564	gi|530464075|gb|EQB46564.1|	hypothetical protein CGLO_14393 [Colletotrichum gloeosporioides Cg-14]	--	--	GO:0006351 transcription, DNA-templated	GO:0008080 N-acetyltransferase activity | GO:0003677 DNA binding | GO:0008270 zinc ion binding	GO:0005634 nucleus
CGLO_14384	12.237	74.6044	2.60801	Up	0.000419644	465	EQB46555	gi|530464066|gb|EQB46555.1|	hypothetical protein CGLO_14384 [Colletotrichum gloeosporioides Cg-14]	--	--	--	--	--
CGLO_14380	11823.1	3655.64	-1.69341	Down	1.06856e-06	873	EQB46551	gi|530464062|gb|EQB46551.1|	hypothetical protein CGLO_14380 [Colletotrichum gloeosporioides Cg-14]	--	--	--	--	--
CGLO_14349	393.697	145.653	-1.43455	Down	1.06846e-06	2151	EQB46590	gi|530464112|gb|EQB46590.1|	hypothetical protein CGLO_14349 [Colletotrichum gloeosporioides Cg-14]	cgr:CAGL0L09691g	hypothetical protein; K09248 proline utilization trans-activator	GO:0000972 transcription-dependent tethering of RNA polymerase II gene DNA at nuclear periphery | GO:2001158 positive regulation of proline catabolic process to glutamate | GO:0045944 positive regulation of transcription from RNA polymerase II promoter	GO:0008270 zinc ion binding | GO:0001077 transcriptional activator activity, RNA polymerase II core promoter proximal region sequence-specific binding | GO:0000978 RNA polymerase II core promoter proximal region sequence-specific DNA binding	GO:0005634 nucleus
CGLO_14309	10.1803	29.3282	1.5265	Up	0.0342991	1119	EQB46620	gi|530464161|gb|EQB46620.1|	hypothetical protein CGLO_14309 [Colletotrichum gloeosporioides Cg-14]	--	--	--	--	--
CGLO_14260	280.745	129.911	-1.11174	Down	0.000328694	1248	EQB46677	gi|530464231|gb|EQB46677.1|	hypothetical protein CGLO_14260 [Colletotrichum gloeosporioides Cg-14]	--	--	--	--	GO:0016021 integral component of membrane
CGLO_04122	23.1941	123.065	2.40759	Up	9.17986e-05	1425	EQB55903	gi|530475920|gb|EQB55903.1|	hypothetical protein CGLO_04122 [Colletotrichum gloeosporioides Cg-14]	aje:HCAG_01147	cysteine desulfurase, mitochondrial precursor; K04487 cysteine desulfurase [EC:2.8.1.7]	GO:0055114 oxidation-reduction process	GO:0050660 flavin adenine dinucleotide binding | GO:0016614 oxidoreductase activity, acting on CH-OH group of donors	--
CGLO_14130	7.96332	43.5176	2.45016	Up	3.40847e-05	783	EQB46788	gi|530464382|gb|EQB46788.1|	hypothetical protein CGLO_14130 [Colletotrichum gloeosporioides Cg-14]	--	--	--	--	GO:0016021 integral component of membrane
CGLO_14107	1399.43	681.369	-1.03833	Down	3.43275e-06	1563	EQB46817	gi|530464419|gb|EQB46817.1|	hypothetical protein CGLO_14107 [Colletotrichum gloeosporioides Cg-14]	tmn:UCRPA7_2223	putative autophagy protein atg15 protein; K17900 lipase ATG15 [EC:3.1.1.3]	GO:0006629 lipid metabolic process | GO:0034496 multivesicular body membrane disassembly | GO:0006624 vacuolar protein processing | GO:0034727 piecemeal microautophagy of nucleus	GO:0016787 hydrolase activity	GO:0005775 vacuolar lumen | GO:0016021 integral component of membrane
CGLO_14080	103.222	218.607	1.08259	Up	0.00295361	3027	EQB46845	gi|530464465|gb|EQB46845.1|	hypothetical protein CGLO_14080 [Colletotrichum gloeosporioides Cg-14]	--	--	--	--	--
CGLO_13989	39.1488	101.061	1.36819	Up	0.0117198	1428	EQB46930	gi|530464588|gb|EQB46930.1|	hypothetical protein CGLO_13989 [Colletotrichum gloeosporioides Cg-14]	--	--	--	--	GO:0016021 integral component of membrane
CGLO_13988	16.7181	59.0379	1.82023	Up	0.00110263	1899	EQB46929	gi|530464587|gb|EQB46929.1|	hypothetical protein CGLO_13988 [Colletotrichum gloeosporioides Cg-14]	npa:UCRNP2_890	putative leucyl-trna synthetase protein; K01869 leucyl-tRNA synthetase [EC:6.1.1.4]	--	--	--
CGLO_13983	7086.32	3487.3	-1.02293	Down	0.000193536	1125	EQB46924	gi|530464582|gb|EQB46924.1|	hypothetical protein CGLO_13983 [Colletotrichum gloeosporioides Cg-14]	vda:VDAG_02411	hypothetical protein; K04450 cyclic AMP-dependent transcription factor ATF-2	GO:0006355 regulation of transcription, DNA-templated	GO:0043565 sequence-specific DNA binding | GO:0003700 transcription factor activity, sequence-specific DNA binding	--
CGLO_13981	525.866	52.5388	-3.32324	Down	5.3637e-19	3048	EQB46922	gi|530464580|gb|EQB46922.1|	hypothetical protein CGLO_13981 [Colletotrichum gloeosporioides Cg-14]	--	--	--	GO:0046872 metal ion binding	--
CGLO_13969	1114.43	406.726	-1.45417	Down	0.0158851	471	EQB46942	gi|530464606|gb|EQB46942.1|	hypothetical protein CGLO_13969 [Colletotrichum gloeosporioides Cg-14]	--	--	--	--	GO:0016021 integral component of membrane
CGLO_13959	229.257	521.107	1.18461	Up	0.0458834	930	EQB46951	gi|530464617|gb|EQB46951.1|	hypothetical protein CGLO_13959 [Colletotrichum gloeosporioides Cg-14]	--	--	--	--	--
CGLO_04006	4.69179	18.9439	2.01352	Up	0.00666196	798	EQB56015	gi|530476057|gb|EQB56015.1|	hypothetical protein CGLO_04006 [Colletotrichum gloeosporioides Cg-14]	--	--	GO:0055114 oxidation-reduction process	GO:0071949 FAD binding | GO:0016491 oxidoreductase activity | GO:0016740 transferase activity	--
CGLO_13852	2248.25	572.886	-1.97248	Down	4.30731e-05	1065	EQB47058	gi|530464786|gb|EQB47058.1|	hypothetical protein CGLO_13852 [Colletotrichum gloeosporioides Cg-14]	nhe:NECHADRAFT_74848	hypothetical protein; K13993 HSP20 family protein	--	--	--
CGLO_13820	243.01	637.228	1.39079	Up	0.00554767	2055	EQB47077	gi|530464817|gb|EQB47077.1|	hypothetical protein CGLO_13820 [Colletotrichum gloeosporioides Cg-14]	vda:VDAG_02764	urea active transporter; K20989 urea-proton symporter	GO:0071918 urea transmembrane transport	GO:0015204 urea transmembrane transporter activity	GO:0016021 integral component of membrane
CGLO_13816	31.6715	87.897	1.47263	Up	0.00365077	3789	EQB47073	gi|530464813|gb|EQB47073.1|	hypothetical protein CGLO_13816 [Colletotrichum gloeosporioides Cg-14]	--	--	--	--	--
CGLO_13567	24.0712	258.209	3.42316	Up	8.43831e-22	639	EQB47306	gi|530465147|gb|EQB47306.1|	hypothetical protein CGLO_13567 [Colletotrichum gloeosporioides Cg-14]	--	--	--	--	--
CGLO_13436	1022.54	462.461	-1.14476	Down	0.0109106	1107	EQB47426	gi|530465305|gb|EQB47426.1|	hypothetical protein CGLO_13436 [Colletotrichum gloeosporioides Cg-14]	--	--	GO:0016226 iron-sulfur cluster assembly | GO:0010421 hydrogen peroxide-mediated programmed cell death | GO:0043066 negative regulation of apoptotic process	GO:0051537 2 iron, 2 sulfur cluster binding | GO:0046872 metal ion binding | GO:0009055 electron carrier activity	GO:0005758 mitochondrial intermembrane space
CGLO_13381	109.276	265.862	1.28271	Up	5.84982e-05	1095	EQB47469	gi|530465374|gb|EQB47469.1|	hypothetical protein CGLO_13381 [Colletotrichum gloeosporioides Cg-14]	tml:GSTUM_00009270001	hypothetical protein; K20929 glyoxal/methylglyoxal oxidase [EC:1.2.3.15]	--	GO:0008061 chitin binding	--
CGLO_13354	94.1671	679.679	2.85156	Up	2.16228e-13	471	EQB47490	gi|530465406|gb|EQB47490.1|	hypothetical protein CGLO_13354 [Colletotrichum gloeosporioides Cg-14]	--	--	--	--	--
CGLO_13341	4.88071	18.6412	1.93334	Up	0.0124854	399	EQB47502	gi|530465424|gb|EQB47502.1|	hypothetical protein CGLO_13341 [Colletotrichum gloeosporioides Cg-14]	--	--	--	--	--
CGLO_13184	12.0557	3.00607	-2.00376	Down	0.0227567	204	EQB47636	gi|530465617|gb|EQB47636.1|	hypothetical protein CGLO_13184 [Colletotrichum gloeosporioides Cg-14]	--	--	--	--	--
CGLO_01831	6.53337	38.754	2.56845	Up	7.47517e-05	1140	EQB57975	gi|530478645|gb|EQB57975.1|	hypothetical protein CGLO_01831 [Colletotrichum gloeosporioides Cg-14]	--	--	GO:0055114 oxidation-reduction process	GO:0016491 oxidoreductase activity | GO:0005507 copper ion binding	--
CGLO_13160	1021.58	347.097	-1.55739	Down	0.0425837	567	EQB47667	gi|530465655|gb|EQB47667.1|	hypothetical protein CGLO_13160 [Colletotrichum gloeosporioides Cg-14]	--	--	--	--	--
CGLO_13037	306.508	128.96	-1.24901	Down	0.0049394	1653	EQB47783	gi|530465810|gb|EQB47783.1|	hypothetical protein CGLO_13037 [Colletotrichum gloeosporioides Cg-14]	--	--	--	--	--
CGLO_00907	308.793	848.954	1.45905	Up	0.00023782	690	EQB58793	gi|530479645|gb|EQB58793.1|	hypothetical protein CGLO_00907 [Colletotrichum gloeosporioides Cg-14]	--	--	GO:0055114 oxidation-reduction process	GO:0016491 oxidoreductase activity	--
CGLO_00245	104.468	584.635	2.48448	Up	0.000130068	1437	EQB59376	gi|530480364|gb|EQB59376.1|	hypothetical protein CGLO_00245 [Colletotrichum gloeosporioides Cg-14]	ang:ANI_1_1278034	An03g03460; D-arabinono-1,4-lactone oxidase; K00107 D-arabinono-1,4-lactone oxidase [EC:1.1.3.37]	GO:0055114 oxidation-reduction process	GO:0050660 flavin adenine dinucleotide binding | GO:0016614 oxidoreductase activity, acting on CH-OH group of donors	--
CGLO_12905	235.118	71.7281	-1.71277	Down	0.000958125	489	EQB47906	gi|530465967|gb|EQB47906.1|	hypothetical protein CGLO_12905 [Colletotrichum gloeosporioides Cg-14]	--	--	--	--	--
CGLO_12760	1.76219	7.39302	2.0688	Up	0.0179132	1305	EQB48064	gi|530466178|gb|EQB48064.1|	hypothetical protein CGLO_12760 [Colletotrichum gloeosporioides Cg-14]	--	--	--	--	GO:0016020 membrane
CGLO_12643	38.015	128.921	1.76185	Up	2.34388e-05	1422	EQB48152	gi|530466296|gb|EQB48152.1|	hypothetical protein CGLO_12643 [Colletotrichum gloeosporioides Cg-14]	--	--	--	--	--
CGLO_12616	7162.85	3257.13	-1.13693	Down	1.84813e-05	711	EQB48168	gi|530466318|gb|EQB48168.1|	hypothetical protein CGLO_12616 [Colletotrichum gloeosporioides Cg-14]	nhe:NECHADRAFT_106477	hypothetical protein; K18576 xyloglucan-specific endo-beta-1,4-glucanase [EC:3.2.1.151]	GO:0000272 polysaccharide catabolic process	GO:0008810 cellulase activity	--
CGLO_12599	579.812	1252.13	1.11073	Up	0.0178479	1500	EQB48189	gi|530466343|gb|EQB48189.1|	hypothetical protein CGLO_12599 [Colletotrichum gloeosporioides Cg-14]	ani:AN3929.2	hypothetical protein; K11369 retrograde regulation protein 2	GO:0055085 transmembrane transport	--	GO:0016021 integral component of membrane
CGLO_12568	130.35	461.728	1.82465	Up	4.23432e-08	1773	EQB48218	gi|530466385|gb|EQB48218.1|	hypothetical protein CGLO_12568 [Colletotrichum gloeosporioides Cg-14]	maw:MAC_01253	DNA replication complex GINS protein psf2; K10733 GINS complex subunit 2	GO:0006357 regulation of transcription from RNA polymerase II promoter	GO:0000981 RNA polymerase II transcription factor activity, sequence-specific DNA binding | GO:0008270 zinc ion binding	GO:0005634 nucleus
CGLO_12532	2997.98	1480.46	-1.01794	Down	0.0402971	2286	EQB48252	gi|530466437|gb|EQB48252.1|	hypothetical protein CGLO_12532 [Colletotrichum gloeosporioides Cg-14]	--	--	--	GO:0008270 zinc ion binding | GO:0003676 nucleic acid binding	--
CGLO_12461	1232.59	2671.41	1.11591	Up	4.87548e-05	996	EQB48310	gi|530466513|gb|EQB48310.1|	hypothetical protein CGLO_12461 [Colletotrichum gloeosporioides Cg-14]	--	--	--	--	--
CGLO_12376	54.1198	12.298	-2.13773	Down	0.00525759	624	EQB48406	gi|530466626|gb|EQB48406.1|	hypothetical protein CGLO_12376 [Colletotrichum gloeosporioides Cg-14]	kla:KLLA0F22242g	hypothetical protein; K01440 nicotinamidase [EC:3.5.1.19]	GO:0008152 metabolic process	GO:0016787 hydrolase activity	--
CGLO_12284	437.891	160.377	-1.4491	Down	0.044622	1776	EQB48479	gi|530466725|gb|EQB48479.1|	hypothetical protein CGLO_12284 [Colletotrichum gloeosporioides Cg-14]	wic:J056_000856	TELO2-interacting protein 1-like protein; K20403 TELO2-interacting protein 1	GO:0008152 metabolic process	GO:0016787 hydrolase activity	--
CGLO_12135	1511.99	537.637	-1.49174	Down	5.6755e-12	957	EQB48615	gi|530466899|gb|EQB48615.1|	hypothetical protein CGLO_12135 [Colletotrichum gloeosporioides Cg-14]	--	--	GO:0008152 metabolic process	GO:0004659 prenyltransferase activity	GO:0016021 integral component of membrane
CGLO_12124	43.3051	16.9687	-1.35166	Down	0.0396626	696	EQB48624	gi|530466911|gb|EQB48624.1|	hypothetical protein CGLO_12124 [Colletotrichum gloeosporioides Cg-14]	--	--	GO:0098869 cellular oxidant detoxification	GO:0004601 peroxidase activity	--
CGLO_12112	44.0766	94.4848	1.10007	Up	0.0361862	633	EQB48632	gi|530466920|gb|EQB48632.1|	hypothetical protein CGLO_12112 [Colletotrichum gloeosporioides Cg-14]	pno:SNOG_02954	hypothetical protein; K17900 lipase ATG15 [EC:3.1.1.3]	GO:0008152 metabolic process	GO:0008080 N-acetyltransferase activity	--
CGLO_11964	31.6574	101.464	1.68036	Up	0.000923687	1635	EQB48773	gi|530467087|gb|EQB48773.1|	hypothetical protein CGLO_11964 [Colletotrichum gloeosporioides Cg-14]	--	--	--	--	--
CGLO_11851	4.10423	17.3246	2.07764	Up	0.00782997	1773	EQB48870	gi|530467225|gb|EQB48870.1|	hypothetical protein CGLO_11851 [Colletotrichum gloeosporioides Cg-14]	ela:UCREL1_7820	putative inositol oxygenase 1 protein; K00469 inositol oxygenase [EC:1.13.99.1]	--	GO:0005524 ATP binding	--
CGLO_11835	2982.34	1366.48	-1.12599	Down	0.00668825	444	EQB48886	gi|530467248|gb|EQB48886.1|	hypothetical protein CGLO_11835 [Colletotrichum gloeosporioides Cg-14]	--	--	--	--	--
CGLO_11431	131.466	62.3412	-1.07643	Down	0.0435891	2910	EQB49248	gi|530467727|gb|EQB49248.1|	hypothetical protein CGLO_11431 [Colletotrichum gloeosporioides Cg-14]	--	--	--	--	GO:0016021 integral component of membrane
CGLO_11350	753.427	358.998	-1.06949	Down	0.0181573	708	EQB49317	gi|530467807|gb|EQB49317.1|	hypothetical protein CGLO_11350 [Colletotrichum gloeosporioides Cg-14]	ani:AN2409.2	hypothetical protein; K00831 phosphoserine aminotransferase [EC:2.6.1.52]	--	--	--
CGLO_11166	2.08465	9.11557	2.12853	Up	0.0136306	1386	EQB49494	gi|530468040|gb|EQB49494.1|	flavin containing amine oxidoreductase [Colletotrichum gloeosporioides Cg-14]	pcs:Pc16g03430	Pc16g03430; K00274 monoamine oxidase [EC:1.4.3.4]	GO:0055114 oxidation-reduction process	GO:0016491 oxidoreductase activity	--
CGLO_11152	51.453	15.206	-1.75862	Down	0.00139445	390	EQB49508	gi|530468057|gb|EQB49508.1|	hypothetical protein CGLO_11152 [Colletotrichum gloeosporioides Cg-14]	--	--	--	--	--
CGLO_11124	90.0194	460.479	2.35483	Up	3.29982e-08	891	EQB49532	gi|530468087|gb|EQB49532.1|	hypothetical protein CGLO_11124 [Colletotrichum gloeosporioides Cg-14]	--	--	--	--	GO:0016021 integral component of membrane
CGLO_11116	3808.91	104.323	-5.19025	Down	1.89491e-29	2277	EQB49524	gi|530468079|gb|EQB49524.1|	hypothetical protein CGLO_11116 [Colletotrichum gloeosporioides Cg-14]	--	--	--	--	--
CGLO_11087	1427.82	3500.54	1.29376	Up	0.0210917	2253	EQB49579	gi|530468137|gb|EQB49579.1|	hypothetical protein CGLO_11087 [Colletotrichum gloeosporioides Cg-14]	--	--	GO:0055085 transmembrane transport	--	GO:0016021 integral component of membrane
CGLO_11073	115.42	19.1515	-2.59136	Down	0.000419862	603	EQB49565	gi|530468123|gb|EQB49565.1|	hypothetical protein CGLO_11073 [Colletotrichum gloeosporioides Cg-14]	pno:SNOG_02947	hypothetical protein; K02021 putative ABC transport system ATP-binding protein	--	--	--
CGLO_11008	279.865	596.165	1.09098	Up	0.00492751	999	EQB49640	gi|530468211|gb|EQB49640.1|	hypothetical protein CGLO_11008 [Colletotrichum gloeosporioides Cg-14]	--	--	--	--	GO:0016021 integral component of membrane
CGLO_10825	3.43833	15.0294	2.128	Up	0.0114797	549	EQB49806	gi|530468427|gb|EQB49806.1|	hypothetical protein CGLO_10825 [Colletotrichum gloeosporioides Cg-14]	--	--	--	--	--
CGLO_10824	2.72749	98.5393	5.17505	Up	3.27045e-19	1065	EQB49805	gi|530468426|gb|EQB49805.1|	hypothetical protein CGLO_10824 [Colletotrichum gloeosporioides Cg-14]	--	--	--	--	GO:0016021 integral component of membrane
CGLO_10726	22.7627	61.779	1.44044	Up	0.0367791	960	EQB49905	gi|530468558|gb|EQB49905.1|	hypothetical protein CGLO_10726 [Colletotrichum gloeosporioides Cg-14]	--	--	--	--	--
CGLO_10409	16.0135	47.0428	1.55469	Up	0.0260174	2334	EQB50168	gi|530468908|gb|EQB50168.1|	hypothetical protein CGLO_10409 [Colletotrichum gloeosporioides Cg-14]	--	--	--	--	--
CGLO_10338	16.3005	52.8412	1.69674	Up	0.00857532	2442	EQB50219	gi|530468971|gb|EQB50219.1|	hypothetical protein CGLO_10338 [Colletotrichum gloeosporioides Cg-14]	yli:YALI0B02838g	YALI0B02838p; K01282 dipeptidyl aminopeptidase [EC:3.4.14.-]	GO:0006508 proteolysis	GO:0008236 serine-type peptidase activity	--
CGLO_10332	50.5115	138.356	1.4537	Up	0.0130529	1581	EQB50213	gi|530468965|gb|EQB50213.1|	hypothetical protein CGLO_10332 [Colletotrichum gloeosporioides Cg-14]	val:VDBG_09878	choline transport protein; K19564 choline transport protein	GO:0003333 amino acid transmembrane transport	GO:0015171 amino acid transmembrane transporter activity	GO:0016021 integral component of membrane
CGLO_10302	100.207	248.767	1.31182	Up	0.0168605	510	EQB50280	gi|530469042|gb|EQB50280.1|	hypothetical protein CGLO_10302 [Colletotrichum gloeosporioides Cg-14]	--	--	--	--	--
CGLO_10111	17.2474	92.1161	2.41708	Up	3.90185e-06	693	EQB50455	gi|530469264|gb|EQB50455.1|	hypothetical protein CGLO_10111 [Colletotrichum gloeosporioides Cg-14]	ztr:MYCGRDRAFT_109073	hypothetical protein; K15165 mediator of RNA polymerase II transcription subunit 13, fungi type	--	--	--
CGLO_09894	70.6702	187.02	1.40402	Up	0.000622744	1947	EQB50638	gi|530469496|gb|EQB50638.1|	hypothetical protein CGLO_09894 [Colletotrichum gloeosporioides Cg-14]	--	--	--	--	GO:0016021 integral component of membrane
CGLO_09893	6516.68	1695.8	-1.94217	Down	2.15139e-07	1830	EQB50637	gi|530469495|gb|EQB50637.1|	hypothetical protein CGLO_09893 [Colletotrichum gloeosporioides Cg-14]	--	--	--	--	GO:0016021 integral component of membrane
CGLO_06778	11.8218	46.751	1.98355	Up	0.00988438	1827	EQB53488	gi|530472987|gb|EQB53488.1|	flavin containing amine oxidoreductase [Colletotrichum gloeosporioides Cg-14]	nhe:NECHADRAFT_88150	hypothetical protein; K00274 monoamine oxidase [EC:1.4.3.4]	GO:0055114 oxidation-reduction process	GO:0016491 oxidoreductase activity	--
CGLO_09775	2138.62	7691.67	1.84662	Up	0.00091652	744	EQB50761	gi|530469649|gb|EQB50761.1|	hypothetical protein CGLO_09775 [Colletotrichum gloeosporioides Cg-14]	--	--	--	--	--
CGLO_09774	35.6314	92.7054	1.37951	Up	0.029461	1539	EQB50760	gi|530469648|gb|EQB50760.1|	hypothetical protein CGLO_09774 [Colletotrichum gloeosporioides Cg-14]	mbe:MBM_08721	transcription initiation protein spt5; K15172 transcription elongation factor SPT5	GO:0008152 metabolic process	GO:0016787 hydrolase activity	GO:0016021 integral component of membrane
CGLO_09768	143.303	533.722	1.89702	Up	0.0087331	720	EQB50754	gi|530469642|gb|EQB50754.1|	hypothetical protein CGLO_09768 [Colletotrichum gloeosporioides Cg-14]	--	--	--	--	--
CGLO_09724	104.038	462.815	2.15333	Up	0.000726305	1578	EQB50803	gi|530469699|gb|EQB50803.1|	hypothetical protein CGLO_09724 [Colletotrichum gloeosporioides Cg-14]	nhe:NECHADRAFT_55882	hypothetical protein; K01179 endoglucanase [EC:3.2.1.4]	GO:0005975 carbohydrate metabolic process	GO:0004553 hydrolase activity, hydrolyzing O-glycosyl compounds	--
CGLO_09723	96.6386	419.549	2.11817	Up	0.000462047	1794	EQB50802	gi|530469698|gb|EQB50802.1|	hypothetical protein CGLO_09723 [Colletotrichum gloeosporioides Cg-14]	ela:UCREL1_8805	putative general substrate transporter protein; K01487 guanine deaminase [EC:3.5.4.3]	GO:0055085 transmembrane transport	GO:0022891 substrate-specific transmembrane transporter activity	GO:0016021 integral component of membrane
CGLO_09686	14.4211	92.3168	2.67842	Up	3.55863e-06	843	EQB50835	gi|530469737|gb|EQB50835.1|	hypothetical protein CGLO_09686 [Colletotrichum gloeosporioides Cg-14]	ztr:MYCGRDRAFT_109073	hypothetical protein; K15165 mediator of RNA polymerase II transcription subunit 13, fungi type	--	--	GO:0016021 integral component of membrane
CGLO_09657	90.9434	35.7161	-1.34839	Down	0.00525759	849	EQB50852	gi|530469760|gb|EQB50852.1|	hypothetical protein CGLO_09657 [Colletotrichum gloeosporioides Cg-14]	--	--	--	--	GO:0016021 integral component of membrane
CGLO_09656	35548	14441.1	-1.29959	Down	1.65551e-05	1737	EQB50866	gi|530469775|gb|EQB50866.1|	hypothetical protein CGLO_09656 [Colletotrichum gloeosporioides Cg-14]	--	--	--	--	GO:0016021 integral component of membrane
CGLO_09628	4743.49	1396.96	-1.76366	Down	0.00400962	1209	EQB50889	gi|530469807|gb|EQB50889.1|	hypothetical protein CGLO_09628 [Colletotrichum gloeosporioides Cg-14]	--	--	--	GO:0003676 nucleic acid binding | GO:0000166 nucleotide binding	--
CGLO_09559	33.2957	108.27	1.70123	Up	0.00105092	1176	EQB50956	gi|530469884|gb|EQB50956.1|	hypothetical protein CGLO_09559 [Colletotrichum gloeosporioides Cg-14]	psq:PUNSTDRAFT_53871	tyrosine aminotransferas-like protein; K00815 tyrosine aminotransferase [EC:2.6.1.5]	GO:0009058 biosynthetic process	GO:0030170 pyridoxal phosphate binding | GO:0008483 transaminase activity	--
CGLO_09546	323.901	153.375	-1.07849	Down	0.012568	1479	EQB50943	gi|530469871|gb|EQB50943.1|	hypothetical protein CGLO_09546 [Colletotrichum gloeosporioides Cg-14]	--	--	--	--	--
CGLO_09514	143.181	337.76	1.23815	Up	0.00707612	2661	EQB50993	gi|530469928|gb|EQB50993.1|	hypothetical protein CGLO_09514 [Colletotrichum gloeosporioides Cg-14]	npa:UCRNP2_890	putative leucyl-trna synthetase protein; K01869 leucyl-tRNA synthetase [EC:6.1.1.4]	--	--	--
CGLO_09470	678.834	2833.28	2.06134	Up	0.0146737	486	EQB51032	gi|530469979|gb|EQB51032.1|	hypothetical protein CGLO_09470 [Colletotrichum gloeosporioides Cg-14]	--	--	--	--	--
CGLO_09469	48.9562	221.416	2.17719	Up	0.000204143	960	EQB51031	gi|530469978|gb|EQB51031.1|	hypothetical protein CGLO_09469 [Colletotrichum gloeosporioides Cg-14]	--	--	--	--	GO:0016021 integral component of membrane
CGLO_09446	98.6492	272.856	1.46776	Up	0.000771249	522	EQB51061	gi|530470011|gb|EQB51061.1|	hypothetical protein CGLO_09446 [Colletotrichum gloeosporioides Cg-14]	--	--	--	--	GO:0016021 integral component of membrane
CGLO_09331	102.637	38.6839	-1.40775	Down	0.0104699	1383	EQB51151	gi|530470126|gb|EQB51151.1|	hypothetical protein CGLO_09331 [Colletotrichum gloeosporioides Cg-14]	nhe:NECHADRAFT_16877	hypothetical protein; K01732 pectin lyase [EC:4.2.2.10]	GO:0000272 polysaccharide catabolic process	GO:0004553 hydrolase activity, hydrolyzing O-glycosyl compounds | GO:0030248 cellulose binding | GO:0016829 lyase activity	GO:0005576 extracellular region
CGLO_06199	12.0761	56.2518	2.21974	Up	1.75029e-05	1110	EQB54018	gi|530473625|gb|EQB54018.1|	FAD dependent oxidoreductase [Colletotrichum gloeosporioides Cg-14]	afv:AFLA_004220	FAD dependent oxidoreductase, putative; K00306 sarcosine oxidase / L-pipecolate oxidase [EC:1.5.3.1 1.5.3.7]	GO:0055114 oxidation-reduction process	GO:0016491 oxidoreductase activity	--
CGLO_09297	47.677	17.1143	-1.47809	Down	0.0136226	1341	EQB51174	gi|530470156|gb|EQB51174.1|	hypothetical protein CGLO_09297 [Colletotrichum gloeosporioides Cg-14]	mgr:MGG_08614	hypothetical protein; K07117 uncharacterized protein	GO:0032259 methylation	GO:0008168 methyltransferase activity	--
CGLO_09279	19.4563	128.644	2.72507	Up	2.50478e-11	549	EQB51213	gi|530470197|gb|EQB51213.1|	hypothetical protein CGLO_09279 [Colletotrichum gloeosporioides Cg-14]	--	--	--	--	--
CGLO_09167	30.8407	91.8715	1.57478	Up	8.32638e-05	948	EQB51296	gi|530470295|gb|EQB51296.1|	hypothetical protein CGLO_09167 [Colletotrichum gloeosporioides Cg-14]	--	--	--	--	--
CGLO_09146	188.376	712.223	1.91872	Up	4.06289e-11	1557	EQB51316	gi|530470318|gb|EQB51316.1|	hypothetical protein CGLO_09146 [Colletotrichum gloeosporioides Cg-14]	fpu:FPSE_07314	hypothetical protein; K20465 oxysterol-binding protein-related protein 9/10/11	GO:0008152 metabolic process	GO:0016758 transferase activity, transferring hexosyl groups	GO:0016021 integral component of membrane
CGLO_09129	11.6657	31.1244	1.41577	Up	0.0424872	879	EQB51333	gi|530470339|gb|EQB51333.1|	hypothetical protein CGLO_09129 [Colletotrichum gloeosporioides Cg-14]	--	--	--	--	GO:0016021 integral component of membrane
CGLO_09078	2665.34	696.001	-1.93716	Down	1.79925e-08	2556	EQB51396	gi|530470411|gb|EQB51396.1|	hypothetical protein CGLO_09078 [Colletotrichum gloeosporioides Cg-14]	--	--	--	--	--
CGLO_09041	1532.15	669.987	-1.19335	Down	0.000341699	1902	EQB51426	gi|530470451|gb|EQB51426.1|	hypothetical protein CGLO_09041 [Colletotrichum gloeosporioides Cg-14]	ani:AN0496.2	hypothetical protein; K03320 ammonium transporter, Amt family	GO:0006357 regulation of transcription from RNA polymerase II promoter	GO:0000981 RNA polymerase II transcription factor activity, sequence-specific DNA binding | GO:0008270 zinc ion binding	GO:0005634 nucleus
CGLO_09012	40.4192	5.2395	-2.94754	Down	1.35601e-05	1104	EQB51448	gi|530470476|gb|EQB51448.1|	hypothetical protein CGLO_09012 [Colletotrichum gloeosporioides Cg-14]	--	--	--	--	--
CGLO_09010	80.2638	27.5885	-1.54068	Down	0.0189415	1122	EQB51446	gi|530470474|gb|EQB51446.1|	hypothetical protein CGLO_09010 [Colletotrichum gloeosporioides Cg-14]	--	--	--	--	--
CGLO_08949	6.56187	62.2302	3.24544	Up	4.9549e-09	1422	EQB51503	gi|530470547|gb|EQB51503.1|	FAD binding domain-containing protein [Colletotrichum gloeosporioides Cg-14]	aje:HCAG_01147	cysteine desulfurase, mitochondrial precursor; K04487 cysteine desulfurase [EC:2.8.1.7]	GO:0055114 oxidation-reduction process	GO:0050660 flavin adenine dinucleotide binding | GO:0016614 oxidoreductase activity, acting on CH-OH group of donors	--
CGLO_08852	338.629	113.35	-1.57893	Down	5.14009e-05	1044	EQB51578	gi|530470642|gb|EQB51578.1|	hypothetical protein CGLO_08852 [Colletotrichum gloeosporioides Cg-14]	afm:AFUA_3G03870	endo-1,4-beta-glucanase; K01179 endoglucanase [EC:3.2.1.4]	--	--	--
CGLO_08851	241.105	86.452	-1.47969	Down	0.0113365	1977	EQB51600	gi|530470665|gb|EQB51600.1|	hypothetical protein CGLO_08851 [Colletotrichum gloeosporioides Cg-14]	fpu:FPSE_08102	hypothetical protein; K01930 folylpolyglutamate synthase [EC:6.3.2.17]	--	--	--
CGLO_08765	4405.26	2142.57	-1.03988	Down	0.0327432	7371	EQB51673	gi|530470762|gb|EQB51673.1|	hypothetical protein CGLO_08765 [Colletotrichum gloeosporioides Cg-14]	--	--	--	--	--
CGLO_08714	2.63216	17.8554	2.76204	Up	0.000274864	894	EQB51730	gi|530470826|gb|EQB51730.1|	hypothetical protein CGLO_08714 [Colletotrichum gloeosporioides Cg-14]	tmn:UCRPA7_523	putative alpha beta protein; K13535 cardiolipin-specific phospholipase [EC:3.1.1.-]	--	--	--
CGLO_08685	1316.24	558.365	-1.23714	Down	0.000357598	1980	EQB51752	gi|530470853|gb|EQB51752.1|	hypothetical protein CGLO_08685 [Colletotrichum gloeosporioides Cg-14]	--	--	--	GO:0046872 metal ion binding | GO:0005524 ATP binding	--
CGLO_11065	1092.67	4515.08	2.0469	Up	4.78141e-09	1539	EQB49592	gi|530468152|gb|EQB49592.1|	FAD binding domain-containing protein [Colletotrichum gloeosporioides Cg-14]	ani:AN8410.2	hypothetical protein; K15387 FAD-dependent monooxygenase	GO:0055114 oxidation-reduction process	GO:0071949 FAD binding | GO:0004497 monooxygenase activity	--
CGLO_08653	3.92373	67.6263	4.10729	Up	7.54247e-14	312	EQB51767	gi|530470873|gb|EQB51767.1|	hypothetical protein CGLO_08653 [Colletotrichum gloeosporioides Cg-14]	--	--	--	--	--
CGLO_08595	61.7753	21.1705	-1.54498	Down	0.00988438	1374	EQB51835	gi|530470954|gb|EQB51835.1|	hypothetical protein CGLO_08595 [Colletotrichum gloeosporioides Cg-14]	vda:VDAG_07139	hypothetical protein; K19787 carnosine N-methyltransferase [EC:2.1.1.22]	--	--	--
CGLO_08592	27.2499	75.6505	1.4731	Up	0.0316612	1542	EQB51832	gi|530470951|gb|EQB51832.1|	hypothetical protein CGLO_08592 [Colletotrichum gloeosporioides Cg-14]	tre:TRIREDRAFT_65191	hypothetical protein; K08141 MFS transporter, SP family, general alpha glucoside:H+ symporter	GO:0055085 transmembrane transport	GO:0022891 substrate-specific transmembrane transporter activity	GO:0016021 integral component of membrane
CGLO_03985	6.04282	40.564	2.74691	Up	4.23084e-06	1605	EQB56023	gi|530476070|gb|EQB56023.1|	dimethylaniline monooxygenase 2 [Colletotrichum gloeosporioides Cg-14]	tmn:UCRPA7_5257	putative flavin containing monooxygenase 9 protein; K00485 dimethylaniline monooxygenase (N-oxide forming) [EC:1.14.13.8]	GO:0055114 oxidation-reduction process	GO:0050660 flavin adenine dinucleotide binding | GO:0004499 N,N-dimethylaniline monooxygenase activity | GO:0050661 NADP binding	--
CGLO_08518	10.3076	32.302	1.64791	Up	0.0461615	1611	EQB51895	gi|530471029|gb|EQB51895.1|	hypothetical protein CGLO_08518 [Colletotrichum gloeosporioides Cg-14]	ela:UCREL1_8805	putative general substrate transporter protein; K01487 guanine deaminase [EC:3.5.4.3]	GO:0055085 transmembrane transport	GO:0022891 substrate-specific transmembrane transporter activity	GO:0016021 integral component of membrane
CGLO_05927	129.435	493.048	1.9295	Up	0.0035323	1698	EQB54257	gi|530473929|gb|EQB54257.1|	cytochrome P450 52A11 [Colletotrichum gloeosporioides Cg-14]	pno:SNOG_00663	hypothetical protein; K01078 acid phosphatase [EC:3.1.3.2]	GO:0055114 oxidation-reduction process	GO:0020037 heme binding | GO:0016705 oxidoreductase activity, acting on paired donors, with incorporation or reduction of molecular oxygen | GO:0004497 monooxygenase activity | GO:0005506 iron ion binding	GO:0016021 integral component of membrane
CGLO_08302	17.0009	52.201	1.61847	Up	0.0015625	867	EQB52097	gi|530471282|gb|EQB52097.1|	hypothetical protein CGLO_08302 [Colletotrichum gloeosporioides Cg-14]	--	--	--	--	--
CGLO_08286	24.3243	6.18201	-1.97625	Down	0.00613534	198	EQB52115	gi|530471306|gb|EQB52115.1|	hypothetical protein CGLO_08286 [Colletotrichum gloeosporioides Cg-14]	--	--	--	--	GO:0016021 integral component of membrane
CGLO_08221	4.75607	18.9457	1.99403	Up	0.00764645	1185	EQB52179	gi|530471388|gb|EQB52179.1|	hypothetical protein CGLO_08221 [Colletotrichum gloeosporioides Cg-14]	--	--	--	--	GO:0016020 membrane
CGLO_12506	53.0339	204.888	1.94985	Up	0.0035323	1551	EQB48277	gi|530466469|gb|EQB48277.1|	cytochrome P450 [Colletotrichum gloeosporioides Cg-14]	cthr:CTHT_0020850	putative extracellular protein; K06113 arabinan endo-1,5-alpha-L-arabinosidase [EC:3.2.1.99]	GO:0055114 oxidation-reduction process	GO:0020037 heme binding | GO:0016705 oxidoreductase activity, acting on paired donors, with incorporation or reduction of molecular oxygen | GO:0004497 monooxygenase activity | GO:0005506 iron ion binding	GO:0016021 integral component of membrane
CGLO_08186	26.8598	96.0067	1.83768	Up	1.22607e-05	2214	EQB52216	gi|530471432|gb|EQB52216.1|	hypothetical protein CGLO_08186 [Colletotrichum gloeosporioides Cg-14]	mbe:MBM_04883	phospho-2-dehydro-3-deoxyheptonate aldolase; K01626 3-deoxy-7-phosphoheptulonate synthase [EC:2.5.1.54]	--	--	GO:0016021 integral component of membrane
CGLO_08164	13.1558	217.241	4.04553	Up	1.30836e-22	1596	EQB52240	gi|530471459|gb|EQB52240.1|	hypothetical protein CGLO_08164 [Colletotrichum gloeosporioides Cg-14]	tre:TRIREDRAFT_68371	hypothetical protein; K08869 aarF domain-containing kinase	--	--	--
CGLO_08127	117.156	25.7785	-2.18418	Down	0.00631334	498	EQB52259	gi|530471482|gb|EQB52259.1|	hypothetical protein CGLO_08127 [Colletotrichum gloeosporioides Cg-14]	tms:TREMEDRAFT_63337	hypothetical protein; K11982 E3 ubiquitin-protein ligase RNF115/126 [EC:2.3.2.27]	--	GO:0008270 zinc ion binding	GO:0016021 integral component of membrane
CGLO_15123	70.9804	175.815	1.30856	Up	0.024891	1761	EQB45923	gi|530463181|gb|EQB45923.1|	cytochrome P450 [Colletotrichum gloeosporioides Cg-14]	pco:PHACADRAFT_183109	hypothetical protein; K07824 benzoate 4-monooxygenase [EC:1.14.13.12]	GO:0055114 oxidation-reduction process	GO:0020037 heme binding | GO:0016705 oxidoreductase activity, acting on paired donors, with incorporation or reduction of molecular oxygen | GO:0004497 monooxygenase activity | GO:0005506 iron ion binding	GO:0016021 integral component of membrane
CGLO_07921	9.3826	29.6084	1.65795	Up	0.0193923	1641	EQB52455	gi|530471713|gb|EQB52455.1|	hypothetical protein CGLO_07921 [Colletotrichum gloeosporioides Cg-14]	smp:SMAC_06339	hypothetical protein; K08900 mitochondrial chaperone BCS1	--	GO:0005524 ATP binding	GO:0016021 integral component of membrane
CGLO_07905	14.6054	48.5998	1.73445	Up	0.001909	816	EQB52468	gi|530471729|gb|EQB52468.1|	hypothetical protein CGLO_07905 [Colletotrichum gloeosporioides Cg-14]	maj:MAA_09086	Molybdopterin biosynthesis MoaE; K03635 molybdopterin synthase catalytic subunit [EC:2.8.1.12]	GO:0006777 Mo-molybdopterin cofactor biosynthetic process	GO:0030366 molybdopterin synthase activity	GO:0016021 integral component of membrane | GO:0005829 cytosol | GO:0019008 molybdopterin synthase complex
CGLO_07844	24.1254	97.5423	2.01547	Up	3.04702e-05	2280	EQB52528	gi|530471798|gb|EQB52528.1|	hypothetical protein CGLO_07844 [Colletotrichum gloeosporioides Cg-14]	--	--	--	--	--
CGLO_07843	12.4502	46.6695	1.90631	Up	0.00153909	939	EQB52527	gi|530471797|gb|EQB52527.1|	hypothetical protein CGLO_07843 [Colletotrichum gloeosporioides Cg-14]	ela:UCREL1_7820	putative inositol oxygenase 1 protein; K00469 inositol oxygenase [EC:1.13.99.1]	--	GO:0005524 ATP binding	--
CGLO_07770	116.848	31.1481	-1.90742	Down	0.00746853	1206	EQB52589	gi|530471877|gb|EQB52589.1|	hypothetical protein CGLO_07770 [Colletotrichum gloeosporioides Cg-14]	--	--	--	--	--
CGLO_07765	97.3532	39.0745	-1.317	Down	0.0136306	453	EQB52597	gi|530471886|gb|EQB52597.1|	hypothetical protein CGLO_07765 [Colletotrichum gloeosporioides Cg-14]	val:VDBG_08508	catabolic 3-dehydroquinase; K03786 3-dehydroquinate dehydratase II [EC:4.2.1.10]	GO:0019630 quinate metabolic process | GO:0046279 3,4-dihydroxybenzoate biosynthetic process	GO:0003855 3-dehydroquinate dehydratase activity	--
CGLO_07764	78.5133	21.5769	-1.86345	Down	0.00287593	231	EQB52596	gi|530471885|gb|EQB52596.1|	hypothetical protein CGLO_07764 [Colletotrichum gloeosporioides Cg-14]	val:VDBG_08507	QA-X; K01092 myo-inositol-1(or 4)-monophosphatase [EC:3.1.3.25]	GO:0046854 phosphatidylinositol phosphorylation	--	--
CGLO_07752	2615.1	836.035	-1.64523	Down	0.00361848	1119	EQB52611	gi|530471904|gb|EQB52611.1|	hypothetical protein CGLO_07752 [Colletotrichum gloeosporioides Cg-14]	--	--	--	--	--
CGLO_07713	96.0951	667.418	2.79605	Up	2.00292e-10	1122	EQB52648	gi|530471954|gb|EQB52648.1|	hypothetical protein CGLO_07713 [Colletotrichum gloeosporioides Cg-14]	--	--	--	--	GO:0016021 integral component of membrane
CGLO_07709	40.7891	13.748	-1.56896	Down	0.031327	1212	EQB52644	gi|530471950|gb|EQB52644.1|	hypothetical protein CGLO_07709 [Colletotrichum gloeosporioides Cg-14]	npa:UCRNP2_8284	putative alpha-galactosidase alpha-n-acetylgalactosaminidase protein; K07407 alpha-galactosidase [EC:3.2.1.22]	GO:0008152 metabolic process	GO:0016829 lyase activity	GO:0042597 periplasmic space
CGLO_07570	76.2599	265.407	1.79921	Up	4.98126e-05	918	EQB52778	gi|530472116|gb|EQB52778.1|	hypothetical protein CGLO_07570 [Colletotrichum gloeosporioides Cg-14]	--	--	--	--	GO:0016021 integral component of membrane
CGLO_07479	5.78412	77.7205	3.74813	Up	2.14102e-08	840	EQB52875	gi|530472229|gb|EQB52875.1|	hypothetical protein CGLO_07479 [Colletotrichum gloeosporioides Cg-14]	--	--	--	--	GO:0016021 integral component of membrane
CGLO_07478	17.4343	143.178	3.03781	Up	1.65551e-05	411	EQB52874	gi|530472228|gb|EQB52874.1|	hypothetical protein CGLO_07478 [Colletotrichum gloeosporioides Cg-14]	--	--	--	--	--
CGLO_06231	23.5248	88.9642	1.91904	Up	0.000953707	2085	EQB53993	gi|530473591|gb|EQB53993.1|	copper amine oxidase [Colletotrichum gloeosporioides Cg-14]	val:VDBG_08713	peroxisomal copper amine oxidase; K00276 primary-amine oxidase [EC:1.4.3.21]	GO:0055114 oxidation-reduction process | GO:0009308 amine metabolic process	GO:0005507 copper ion binding | GO:0048038 quinone binding | GO:0008131 primary amine oxidase activity	--
CGLO_07384	21.3486	47.1739	1.14385	Up	0.0448605	1734	EQB52948	gi|530472316|gb|EQB52948.1|	hypothetical protein CGLO_07384 [Colletotrichum gloeosporioides Cg-14]	pan:PODANSg327	hypothetical protein; K01198 xylan 1,4-beta-xylosidase [EC:3.2.1.37]	GO:0005975 carbohydrate metabolic process	GO:0004553 hydrolase activity, hydrolyzing O-glycosyl compounds	--
CGLO_08735	494.255	1088.38	1.13885	Up	0.0268195	2040	EQB51701	gi|530470794|gb|EQB51701.1|	copper amine oxidase [Colletotrichum gloeosporioides Cg-14]	val:VDBG_09214	peroxisomal copper amine oxidase; K00276 primary-amine oxidase [EC:1.4.3.21]	GO:0055114 oxidation-reduction process | GO:0009308 amine metabolic process	GO:0005507 copper ion binding | GO:0048038 quinone binding | GO:0008131 primary amine oxidase activity	--
CGLO_07304	1.9764	7.11204	1.84739	Up	0.0443198	1086	EQB53020	gi|530472400|gb|EQB53020.1|	hypothetical protein CGLO_07304 [Colletotrichum gloeosporioides Cg-14]	--	--	--	--	--
CGLO_07286	2.02225	9.21599	2.18818	Up	0.0102943	660	EQB53030	gi|530472413|gb|EQB53030.1|	hypothetical protein CGLO_07286 [Colletotrichum gloeosporioides Cg-14]	--	--	--	--	--
CGLO_07166	1161.93	570.633	-1.02588	Down	0.0420891	588	EQB53145	gi|530472560|gb|EQB53145.1|	hypothetical protein CGLO_07166 [Colletotrichum gloeosporioides Cg-14]	--	--	--	--	GO:0016021 integral component of membrane
CGLO_07155	27.5445	125.739	2.19059	Up	1.94351e-08	1755	EQB53150	gi|530472568|gb|EQB53150.1|	hypothetical protein CGLO_07155 [Colletotrichum gloeosporioides Cg-14]	gtr:GLOTRDRAFT_121064	MFS general substrate transporter; K08197 MFS transporter, SIT family, siderophore-iron:H+ symporter	GO:0055085 transmembrane transport	--	GO:0016021 integral component of membrane
CGLO_07139	1168.52	502.743	-1.21679	Down	0.00969548	1896	EQB53179	gi|530472603|gb|EQB53179.1|	hypothetical protein CGLO_07139 [Colletotrichum gloeosporioides Cg-14]	maw:MAC_06171	glutamyl-tRNA(Gln) amidotransferase subunit A; K01426 amidase [EC:3.5.1.4]	GO:0008152 metabolic process	GO:0016884 carbon-nitrogen ligase activity, with glutamine as amido-N-donor | GO:0016740 transferase activity	--
CGLO_07138	1132.93	494.019	-1.19742	Down	0.0201123	2592	EQB53178	gi|530472602|gb|EQB53178.1|	hypothetical protein CGLO_07138 [Colletotrichum gloeosporioides Cg-14]	--	--	--	--	GO:0016021 integral component of membrane
CGLO_07095	18.9551	66.9529	1.82056	Up	0.00360683	1803	EQB53215	gi|530472646|gb|EQB53215.1|	hypothetical protein CGLO_07095 [Colletotrichum gloeosporioides Cg-14]	--	--	--	--	GO:0016021 integral component of membrane
CGLO_07093	2275.48	1114.25	-1.0301	Down	0.0303428	837	EQB53213	gi|530472644|gb|EQB53213.1|	hypothetical protein CGLO_07093 [Colletotrichum gloeosporioides Cg-14]	--	--	--	--	--
CGLO_07081	118033	52496	-1.16891	Down	7.12794e-08	1614	EQB53224	gi|530472657|gb|EQB53224.1|	hypothetical protein CGLO_07081 [Colletotrichum gloeosporioides Cg-14]	nhe:NECHADRAFT_102056	hypothetical protein; K08139 MFS transporter, SP family, sugar:H+ symporter	GO:0055085 transmembrane transport	GO:0022891 substrate-specific transmembrane transporter activity	GO:0016021 integral component of membrane
CGLO_07053	68.1453	165.349	1.27882	Up	0.000175533	834	EQB53245	gi|530472686|gb|EQB53245.1|	hypothetical protein CGLO_07053 [Colletotrichum gloeosporioides Cg-14]	--	--	--	--	--
CGLO_06848	143.211	534.183	1.89919	Up	0.0109739	705	EQB53411	gi|530472893|gb|EQB53411.1|	hypothetical protein CGLO_06848 [Colletotrichum gloeosporioides Cg-14]	--	--	--	--	--
CGLO_06807	399.399	115.637	-1.78823	Down	0.00728478	2250	EQB53466	gi|530472957|gb|EQB53466.1|	hypothetical protein CGLO_06807 [Colletotrichum gloeosporioides Cg-14]	--	--	--	--	--
CGLO_14713	622.86	1286.53	1.04651	Up	0.00306486	867	EQB46250	gi|530463619|gb|EQB46250.1|	aldo/keto reductase [Colletotrichum gloeosporioides Cg-14]	tbl:TBLA_0A06510	TBLA0A06510; hypothetical protein; K18097 glycerol 2-dehydrogenase (NADP+) [EC:1.1.1.156]	GO:0055114 oxidation-reduction process	GO:0016491 oxidoreductase activity	GO:0005829 cytosol | GO:0005634 nucleus
CGLO_04263	13.8462	203.909	3.88037	Up	1.04117e-16	1446	EQB55776	gi|530475762|gb|EQB55776.1|	aldehyde dehydrogenase [Colletotrichum gloeosporioides Cg-14]	dha:DEHA2F00792g	DEHA2F00792p; K00128 aldehyde dehydrogenase (NAD+) [EC:1.2.1.3]	GO:0055114 oxidation-reduction process	GO:0016620 oxidoreductase activity, acting on the aldehyde or oxo group of donors, NAD or NADP as acceptor	--
CGLO_17265	29.6288	80.9614	1.45024	Up	0.000923687	1503	EQB44025	gi|530460759|gb|EQB44025.1|	aldehyde dehydrogenase [Colletotrichum gloeosporioides Cg-14]	fgr:FGSG_02273	aldehyde dehydrogenase; K00129 aldehyde dehydrogenase (NAD(P)+) [EC:1.2.1.5]	GO:0055114 oxidation-reduction process	GO:0016620 oxidoreductase activity, acting on the aldehyde or oxo group of donors, NAD or NADP as acceptor	--
CGLO_06622	2618.67	8233.64	1.6527	Up	2.99971e-05	495	EQB53633	gi|530473152|gb|EQB53633.1|	hypothetical protein CGLO_06622 [Colletotrichum gloeosporioides Cg-14]	--	--	--	--	GO:0016021 integral component of membrane
CGLO_06621	2.98572	13.4124	2.16742	Up	0.0101173	1116	EQB53632	gi|530473151|gb|EQB53632.1|	hypothetical protein CGLO_06621 [Colletotrichum gloeosporioides Cg-14]	--	--	GO:0032259 methylation	GO:0008168 methyltransferase activity	--
CGLO_06603	77.2955	16.686	-2.21174	Down	3.40957e-06	1137	EQB53644	gi|530473167|gb|EQB53644.1|	hypothetical protein CGLO_06603 [Colletotrichum gloeosporioides Cg-14]	--	--	--	--	GO:0016021 integral component of membrane
CGLO_06586	3.91474	14.1319	1.85196	Up	0.0361161	2154	EQB53671	gi|530473196|gb|EQB53671.1|	hypothetical protein CGLO_06586 [Colletotrichum gloeosporioides Cg-14]	--	--	--	--	--
CGLO_06155	406.559	842.868	1.05184	Up	0.049504	1509	EQB54066	gi|530473683|gb|EQB54066.1|	aldehyde dehydrogenase [Colletotrichum gloeosporioides Cg-14]	ela:UCREL1_1700	putative aldehyde dehydrogenase aldh protein; K00129 aldehyde dehydrogenase (NAD(P)+) [EC:1.2.1.5]	GO:0055114 oxidation-reduction process	GO:0016620 oxidoreductase activity, acting on the aldehyde or oxo group of donors, NAD or NADP as acceptor	--
CGLO_06525	138.536	509.015	1.87745	Up	0.00375861	603	EQB53734	gi|530473269|gb|EQB53734.1|	hypothetical protein CGLO_06525 [Colletotrichum gloeosporioides Cg-14]	--	--	--	--	--
CGLO_06431	6989.2	3421.88	-1.03034	Down	0.00474585	2730	EQB53812	gi|530473362|gb|EQB53812.1|	hypothetical protein CGLO_06431 [Colletotrichum gloeosporioides Cg-14]	--	--	--	--	--
CGLO_06348	313.152	942.533	1.58968	Up	0.00656206	1953	EQB53885	gi|530473454|gb|EQB53885.1|	hypothetical protein CGLO_06348 [Colletotrichum gloeosporioides Cg-14]	ela:UCREL1_7820	putative inositol oxygenase 1 protein; K00469 inositol oxygenase [EC:1.13.99.1]	--	GO:0005524 ATP binding	--
CGLO_06312	16.0071	4.88232	-1.71308	Down	0.0398382	765	EQB53918	gi|530473494|gb|EQB53918.1|	hypothetical protein CGLO_06312 [Colletotrichum gloeosporioides Cg-14]	tve:TRV_01116	hypothetical protein; K01873 valyl-tRNA synthetase [EC:6.1.1.9]	--	--	--
CGLO_06220	69.9147	8.48106	-3.04328	Down	1.3477e-05	1071	EQB53998	gi|530473598|gb|EQB53998.1|	hypothetical protein CGLO_06220 [Colletotrichum gloeosporioides Cg-14]	mgr:MGG_05011	initiation-specific alpha-1,6-mannosyltransferase; K05528 alpha 1,6-mannosyltransferase [EC:2.4.1.232]	GO:0008152 metabolic process	GO:0016757 transferase activity, transferring glycosyl groups	GO:0016021 integral component of membrane
CGLO_02509	7.99929	80.7803	3.33606	Up	6.70256e-13	1104	EQB57375	gi|530477921|gb|EQB57375.1|	alcohol dehydrogenase GroES-like domain-containing protein [Colletotrichum gloeosporioides Cg-14]	mbe:MBM_02416	alcohol dehydrogenase GroES-like domain-containing protein; K13953 alcohol dehydrogenase, propanol-preferring [EC:1.1.1.1]	GO:0055114 oxidation-reduction process	GO:0008270 zinc ion binding | GO:0016491 oxidoreductase activity	--
CGLO_06099	97.3329	307.058	1.65751	Up	5.69579e-10	1416	EQB54109	gi|530473736|gb|EQB54109.1|	hypothetical protein CGLO_06099 [Colletotrichum gloeosporioides Cg-14]	ani:AN0496.2	hypothetical protein; K03320 ammonium transporter, Amt family	GO:0006357 regulation of transcription from RNA polymerase II promoter	GO:0008270 zinc ion binding | GO:0000981 RNA polymerase II transcription factor activity, sequence-specific DNA binding	GO:0005634 nucleus
CGLO_06067	501.226	231.662	-1.11344	Down	1.97309e-05	1356	EQB54136	gi|530473770|gb|EQB54136.1|	hypothetical protein CGLO_06067 [Colletotrichum gloeosporioides Cg-14]	--	--	--	--	--
CGLO_06051	66.9806	183.149	1.4512	Up	0.000923687	642	EQB54144	gi|530473780|gb|EQB54144.1|	hypothetical protein CGLO_06051 [Colletotrichum gloeosporioides Cg-14]	--	--	--	--	--
CGLO_05981	8957.13	3226.09	-1.47325	Down	0.000380635	495	EQB54209	gi|530473865|gb|EQB54209.1|	hypothetical protein CGLO_05981 [Colletotrichum gloeosporioides Cg-14]	--	--	--	--	GO:0016021 integral component of membrane
CGLO_05960	10313.5	4941.07	-1.06164	Down	0.000715749	1800	EQB54235	gi|530473901|gb|EQB54235.1|	hypothetical protein CGLO_05960 [Colletotrichum gloeosporioides Cg-14]	--	--	GO:0008361 regulation of cell size	--	GO:0016021 integral component of membrane | GO:0005737 cytoplasm
CGLO_05928	57.9858	130.672	1.17218	Up	0.0193526	363	EQB54258	gi|530473930|gb|EQB54258.1|	hypothetical protein CGLO_05928 [Colletotrichum gloeosporioides Cg-14]	--	--	--	--	--
CGLO_05916	608.954	254.463	-1.25888	Down	3.82134e-08	2310	EQB54278	gi|530473953|gb|EQB54278.1|	hypothetical protein CGLO_05916 [Colletotrichum gloeosporioides Cg-14]	--	--	--	GO:0046872 metal ion binding	--
CGLO_05857	334.602	32.5513	-3.36166	Down	1.1142e-14	891	EQB54319	gi|530474003|gb|EQB54319.1|	hypothetical protein CGLO_05857 [Colletotrichum gloeosporioides Cg-14]	--	--	--	--	--
CGLO_18117	4.1769	16.8157	2.0093	Up	0.0224791	738	EQB43248	gi|530459729|gb|EQB43248.1|	aflatoxin biosynthesis ketoreductase nor-1 [Colletotrichum gloeosporioides Cg-14]	ttt:THITE_2147584	hypothetical protein; K17644 norsolorinic acid ketoreductase [EC:1.1.1.349]	GO:0055114 oxidation-reduction process	GO:0016491 oxidoreductase activity	--
CGLO_11290	114.615	1227.51	3.42087	Up	5.3637e-19	1071	EQB49373	gi|530467877|gb|EQB49373.1|	3-beta hydroxysteroid dehydrogenase/isomerase [Colletotrichum gloeosporioides Cg-14]	tmn:UCRPA7_5729	putative sterol-4-alpha-carboxylate 3-dehydrogenase protein; K07748 sterol-4alpha-carboxylate 3-dehydrogenase (decarboxylating) [EC:1.1.1.170]	GO:0006696 ergosterol biosynthetic process | GO:0055114 oxidation-reduction process	GO:0003854 3-beta-hydroxy-delta5-steroid dehydrogenase activity | GO:0000252 C-3 sterol dehydrogenase (C-4 sterol decarboxylase) activity | GO:0016853 isomerase activity	GO:0005789 endoplasmic reticulum membrane
CGLO_05786	72.8008	804.765	3.46654	Up	3.754e-09	888	EQB54373	gi|530474072|gb|EQB54373.1|	hypothetical protein CGLO_05786 [Colletotrichum gloeosporioides Cg-14]	--	--	--	--	GO:0016021 integral component of membrane
CGLO_05778	52.2397	15.9147	-1.71479	Down	0.0344124	1359	EQB54401	gi|530474101|gb|EQB54401.1|	hypothetical protein CGLO_05778 [Colletotrichum gloeosporioides Cg-14]	vda:VDAG_09392	vacuolar calcium ion transporter; K07300 Ca2+:H+ antiporter	GO:0055085 transmembrane transport	--	GO:0016021 integral component of membrane
CGLO_05768	83.5536	169.417	1.01981	Up	0.0221393	1770	EQB54407	gi|530474109|gb|EQB54407.1|	hypothetical protein CGLO_05768 [Colletotrichum gloeosporioides Cg-14]	tre:TRIREDRAFT_121284	hypothetical protein; K14663 protein N-terminal amidase [EC:3.5.1.-]	GO:0006807 nitrogen compound metabolic process	GO:0016810 hydrolase activity, acting on carbon-nitrogen (but not peptide) bonds	--
CGLO_05654	15.9104	106.62	2.74443	Up	3.60012e-08	1407	EQB54508	gi|530474238|gb|EQB54508.1|	hypothetical protein CGLO_05654 [Colletotrichum gloeosporioides Cg-14]	maw:MAC_01085	transthyretin domain protein; K07127 5-hydroxyisourate hydrolase [EC:3.5.2.17]	GO:0008152 metabolic process	GO:0016758 transferase activity, transferring hexosyl groups	--
CGLO_05634	58.0025	15.7482	-1.88093	Down	0.000179592	354	EQB54529	gi|530474263|gb|EQB54529.1|	hypothetical protein CGLO_05634 [Colletotrichum gloeosporioides Cg-14]	--	--	--	--	--
CGLO_05633	724.327	148.503	-2.28615	Down	6.68548e-06	414	EQB54528	gi|530474262|gb|EQB54528.1|	hypothetical protein CGLO_05633 [Colletotrichum gloeosporioides Cg-14]	--	--	--	--	--
CGLO_05545	25.7892	70.2284	1.44529	Up	0.0206996	1953	EQB54595	gi|530474351|gb|EQB54595.1|	hypothetical protein CGLO_05545 [Colletotrichum gloeosporioides Cg-14]	val:VDBG_04049	mitochondrial chaperone BCS1; K08900 mitochondrial chaperone BCS1	--	GO:0005524 ATP binding	--
CGLO_05511	16.171	87.4958	2.43581	Up	1.54783e-07	1611	EQB54629	gi|530474390|gb|EQB54629.1|	hypothetical protein CGLO_05511 [Colletotrichum gloeosporioides Cg-14]	dha:DEHA2C11374g	DEHA2C11374p; K08139 MFS transporter, SP family, sugar:H+ symporter	GO:0055085 transmembrane transport	GO:0022891 substrate-specific transmembrane transporter activity	GO:0016021 integral component of membrane
CGLO_05480	158.842	78.0254	-1.02558	Down	0.012568	960	EQB54660	gi|530474432|gb|EQB54660.1|	hypothetical protein CGLO_05480 [Colletotrichum gloeosporioides Cg-14]	cthr:CTHT_0050570	AP-1 complex subunit mu-1-like protein; K11826 AP-2 complex subunit mu-1	--	--	GO:0016021 integral component of membrane
CGLO_00461	10.9247	39.0546	1.8379	Up	0.0309494	978	EQB59183	gi|530480120|gb|EQB59183.1|	2-dehydropantoate 2-reductase [Colletotrichum gloeosporioides Cg-14]	pfj:MYCFIDRAFT_173622	hypothetical protein; K08955 ATP-dependent metalloprotease [EC:3.4.24.-]	GO:0015940 pantothenate biosynthetic process | GO:0055114 oxidation-reduction process	GO:0050661 NADP binding | GO:0008677 2-dehydropantoate 2-reductase activity	GO:0005737 cytoplasm | GO:0016021 integral component of membrane
CGLO_05452	38.5742	92.7935	1.26639	Up	0.0237559	1071	EQB54675	gi|530474453|gb|EQB54675.1|	hypothetical protein CGLO_05452 [Colletotrichum gloeosporioides Cg-14]	pfj:MYCFIDRAFT_49459	hypothetical protein; K17648 versiconal hemiacetal acetate esterase [EC:3.1.1.94]	GO:0008152 metabolic process	GO:0016787 hydrolase activity	--
CGLO_05360	306.452	754.916	1.30065	Up	0.00120284	1026	EQB54755	gi|530474554|gb|EQB54755.1|	hypothetical protein CGLO_05360 [Colletotrichum gloeosporioides Cg-14]	--	--	--	--	--
CGLO_05303	94.7545	38.5236	-1.29845	Down	0.0427374	561	EQB54811	gi|530474616|gb|EQB54811.1|	hypothetical protein CGLO_05303 [Colletotrichum gloeosporioides Cg-14]	--	--	--	--	--
CGLO_05223	7436.03	15157.8	1.02745	Up	0.026628	693	EQB54892	gi|530474703|gb|EQB54892.1|	hypothetical protein CGLO_05223 [Colletotrichum gloeosporioides Cg-14]	pte:PTT_12812	hypothetical protein; K01527 nascent polypeptide-associated complex subunit beta	--	--	--
CGLO_05211	16.7955	72.7451	2.11478	Up	7.57909e-05	1977	EQB54898	gi|530474710|gb|EQB54898.1|	hypothetical protein CGLO_05211 [Colletotrichum gloeosporioides Cg-14]	maj:MAA_07124	Peptidase S33 tripeptidyl aminopeptidase-like protein; K08329 autophagy-related protein 17	--	--	GO:0016021 integral component of membrane
CGLO_05210	9.97792	32.8674	1.71985	Up	0.00775437	1062	EQB54897	gi|530474709|gb|EQB54897.1|	hypothetical protein CGLO_05210 [Colletotrichum gloeosporioides Cg-14]	--	--	--	--	GO:0016021 integral component of membrane
CGLO_05184	334.074	68.4029	-2.28804	Down	0.000377255	489	EQB54933	gi|530474750|gb|EQB54933.1|	hypothetical protein CGLO_05184 [Colletotrichum gloeosporioides Cg-14]	--	--	--	--	--
CGLO_05183	5.27551	22.1744	2.07151	Up	0.010728	1380	EQB54932	gi|530474749|gb|EQB54932.1|	hypothetical protein CGLO_05183 [Colletotrichum gloeosporioides Cg-14]	maw:MAC_01085	transthyretin domain protein; K07127 5-hydroxyisourate hydrolase [EC:3.5.2.17]	GO:0008152 metabolic process	GO:0016758 transferase activity, transferring hexosyl groups	--
CGLO_05161	41.5741	143.58	1.7881	Up	4.00572e-06	942	EQB54947	gi|530474768|gb|EQB54947.1|	hypothetical protein CGLO_05161 [Colletotrichum gloeosporioides Cg-14]	--	--	--	--	--
CGLO_05119	28.2453	90.53	1.68039	Up	0.00171773	927	EQB54989	gi|530474816|gb|EQB54989.1|	hypothetical protein CGLO_05119 [Colletotrichum gloeosporioides Cg-14]	ela:UCREL1_8069	putative nmral1 protein; K00140 malonate-semialdehyde dehydrogenase (acetylating) / methylmalonate-semialdehyde dehydrogenase [EC:1.2.1.18 1.2.1.27]	--	--	--
CGLO_05106	83.8604	238.166	1.50591	Up	0.00287593	1488	EQB55000	gi|530474829|gb|EQB55000.1|	hypothetical protein CGLO_05106 [Colletotrichum gloeosporioides Cg-14]	bor:COCMIDRAFT_105365	hypothetical protein; K01939 adenylosuccinate synthase [EC:6.3.4.4]	GO:0055085 transmembrane transport	--	GO:0016021 integral component of membrane
CGLO_17541	507.007	223.815	-1.1797	Down	2.96185e-06	1041	EQB43760	gi|530460437|gb|EQB43760.1|	zinc-binding dehydrogenase [Colletotrichum gloeosporioides Cg-14]	nhe:NECHADRAFT_61516	hypothetical protein; K07119 uncharacterized protein	GO:0055114 oxidation-reduction process	GO:0008270 zinc ion binding | GO:0016491 oxidoreductase activity	--
CGLO_05085	1031.12	236.694	-2.12312	Down	0.0120909	846	EQB55012	gi|530474845|gb|EQB55012.1|	hypothetical protein CGLO_05085 [Colletotrichum gloeosporioides Cg-14]	--	--	--	--	--
CGLO_05056	7.554	32.8279	2.11961	Up	0.00134246	3231	EQB55052	gi|530474889|gb|EQB55052.1|	hypothetical protein CGLO_05056 [Colletotrichum gloeosporioides Cg-14]	pno:SNOG_04691	hypothetical protein; K16261 yeast amino acid transporter	--	--	--
CGLO_05018	1109.37	3880.37	1.80646	Up	1.06846e-06	537	EQB55078	gi|530474924|gb|EQB55078.1|	hypothetical protein CGLO_05018 [Colletotrichum gloeosporioides Cg-14]	--	--	--	--	--
CGLO_05017	2664.19	489.288	-2.44494	Down	1.75029e-05	795	EQB55087	gi|530474934|gb|EQB55087.1|	hypothetical protein CGLO_05017 [Colletotrichum gloeosporioides Cg-14]	--	--	--	--	--
CGLO_05005	386.635	803.518	1.05536	Up	0.00149265	1659	EQB55096	gi|530474945|gb|EQB55096.1|	hypothetical protein CGLO_05005 [Colletotrichum gloeosporioides Cg-14]	bze:COCCADRAFT_84900	hypothetical protein; K00866 choline kinase [EC:2.7.1.32]	GO:0055085 transmembrane transport	--	GO:0016021 integral component of membrane
CGLO_04957	152.831	51.5978	-1.56655	Down	0.040831	1101	EQB55141	gi|530474997|gb|EQB55141.1|	hypothetical protein CGLO_04957 [Colletotrichum gloeosporioides Cg-14]	--	--	--	--	GO:0016021 integral component of membrane
CGLO_04951	51.1397	116.17	1.18372	Up	0.00557242	306	EQB55151	gi|530475008|gb|EQB55151.1|	hypothetical protein CGLO_04951 [Colletotrichum gloeosporioides Cg-14]	ncr:NCU04850	exo-beta-1,3-glucanase; K01210 glucan 1,3-beta-glucosidase [EC:3.2.1.58]	--	--	--
CGLO_04934	43.1654	14.4951	-1.57431	Down	0.00953549	549	EQB55157	gi|530475017|gb|EQB55157.1|	hypothetical protein CGLO_04934 [Colletotrichum gloeosporioides Cg-14]	--	--	--	--	--
CGLO_04899	603.798	1516.67	1.32877	Up	0.00361073	1335	EQB55203	gi|530475072|gb|EQB55203.1|	hypothetical protein CGLO_04899 [Colletotrichum gloeosporioides Cg-14]	vda:VDAG_07428	chalcone and stilbene synthase domain-containing protein; K16231 fungal type III polyketide synthase	GO:0009058 biosynthetic process	GO:0016747 transferase activity, transferring acyl groups other than amino-acyl groups	--
CGLO_04828	5959.77	2968.87	-1.00534	Down	0.000497046	1056	EQB55265	gi|530475145|gb|EQB55265.1|	hypothetical protein CGLO_04828 [Colletotrichum gloeosporioides Cg-14]	ncr:NCU02924	epoxide hydrolase; K08726 soluble epoxide hydrolase / lipid-phosphate phosphatase [EC:3.3.2.10 3.1.3.76]	GO:0008152 metabolic process	GO:0016787 hydrolase activity	--
CGLO_04775	9.09911	34.7891	1.93484	Up	0.0218126	798	EQB55311	gi|530475202|gb|EQB55311.1|	hypothetical protein CGLO_04775 [Colletotrichum gloeosporioides Cg-14]	--	--	--	--	--
CGLO_04755	257.032	113.377	-1.18082	Down	0.0150219	870	EQB55336	gi|530475231|gb|EQB55336.1|	hypothetical protein CGLO_04755 [Colletotrichum gloeosporioides Cg-14]	tms:TREMEDRAFT_72775	hypothetical protein; K17887 sorting nexin-25	--	--	GO:0016021 integral component of membrane
CGLO_05482	417.93	97.7324	-2.09635	Down	0.00023782	1077	EQB54653	gi|530474424|gb|EQB54653.1|	zinc-binding dehydrogenase [Colletotrichum gloeosporioides Cg-14]	ang:ANI_1_358144	An16g02510; quinone oxidoreductase; K00002 alcohol dehydrogenase (NADP+) [EC:1.1.1.2]	GO:0055114 oxidation-reduction process	GO:0008270 zinc ion binding | GO:0016491 oxidoreductase activity	--
CGLO_04687	5.17553	21.2496	2.03766	Up	0.0126858	2088	EQB55388	gi|530475296|gb|EQB55388.1|	hypothetical protein CGLO_04687 [Colletotrichum gloeosporioides Cg-14]	afv:AFLA_005310	vacuolar ATP synthase proteolipid subunit, putative; K02155 V-type H+-transporting ATPase 16kDa proteolipid subunit	GO:0009116 nucleoside metabolic process	GO:0003824 catalytic activity	--
CGLO_04664	234.376	614.671	1.39099	Up	1.94152e-07	576	EQB55412	gi|530475325|gb|EQB55412.1|	hypothetical protein CGLO_04664 [Colletotrichum gloeosporioides Cg-14]	--	--	--	--	--
CGLO_04572	319.738	103.891	-1.62182	Down	1.23351e-06	1653	EQB55497	gi|530475427|gb|EQB55497.1|	hypothetical protein CGLO_04572 [Colletotrichum gloeosporioides Cg-14]	maw:MAC_06383	aspartate carbamoyltransferase catalytic subunit; K11541 carbamoyl-phosphate synthase / aspartate carbamoyltransferase [EC:6.3.5.5 2.1.3.2]	--	--	--
CGLO_04549	322.877	156	-1.04944	Down	0.0142108	714	EQB55506	gi|530475440|gb|EQB55506.1|	hypothetical protein CGLO_04549 [Colletotrichum gloeosporioides Cg-14]	vda:VDAG_09387	hypothetical protein; K00799 glutathione S-transferase [EC:2.5.1.18]	GO:0008152 metabolic process	GO:0016740 transferase activity	--
CGLO_04537	233.285	25.1828	-3.21158	Down	7.23331e-09	219	EQB55531	gi|530475469|gb|EQB55531.1|	hypothetical protein CGLO_04537 [Colletotrichum gloeosporioides Cg-14]	--	--	--	--	--
CGLO_04509	368.824	36.4509	-3.33891	Down	6.9102e-08	741	EQB55550	gi|530475494|gb|EQB55550.1|	hypothetical protein CGLO_04509 [Colletotrichum gloeosporioides Cg-14]	--	--	--	--	--
CGLO_16798	76.4563	15.4683	-2.30532	Down	0.00049638	1050	EQB44459	gi|530461319|gb|EQB44459.1|	zinc-binding dehydrogenase [Colletotrichum gloeosporioides Cg-14]	vda:VDAG_02863	NADP-dependent leukotriene B4 12-hydroxydehydrogenase; K07119 uncharacterized protein	GO:0055114 oxidation-reduction process	GO:0008270 zinc ion binding | GO:0016491 oxidoreductase activity	--
CGLO_04450	46.2723	141.064	1.60813	Up	0.00342031	1308	EQB55618	gi|530475577|gb|EQB55618.1|	hypothetical protein CGLO_04450 [Colletotrichum gloeosporioides Cg-14]	--	--	--	--	GO:0016021 integral component of membrane
CGLO_04439	11.1496	63.386	2.50718	Up	0.00136299	1506	EQB55607	gi|530475566|gb|EQB55607.1|	hypothetical protein CGLO_04439 [Colletotrichum gloeosporioides Cg-14]	ela:UCREL1_8805	putative general substrate transporter protein; K01487 guanine deaminase [EC:3.5.4.3]	GO:0055085 transmembrane transport | GO:0008643 carbohydrate transport	GO:0022891 substrate-specific transmembrane transporter activity	GO:0016021 integral component of membrane
CGLO_04392	34799.4	15757.3	-1.14304	Down	0.00139445	1491	EQB55646	gi|530475611|gb|EQB55646.1|	hypothetical protein CGLO_04392 [Colletotrichum gloeosporioides Cg-14]	--	--	--	--	GO:0016021 integral component of membrane
CGLO_04302	2.04581	10.5918	2.37221	Up	0.00408227	2523	EQB55739	gi|530475716|gb|EQB55739.1|	hypothetical protein CGLO_04302 [Colletotrichum gloeosporioides Cg-14]	aor:AOR_1_1366054	AO090011000816; hypothetical protein; K10981 DNA polymerase IV [EC:2.7.7.7]	--	--	GO:0016021 integral component of membrane
CGLO_00329	12328.9	5131	-1.26474	Down	0.000326447	4605	EQB59313	gi|530480278|gb|EQB59313.1|	sulfite reductase hemoprotein [Colletotrichum gloeosporioides Cg-14]	vda:VDAG_10158	sulfite reductase subunit beta; K00381 sulfite reductase (NADPH) hemoprotein beta-component [EC:1.8.1.2]	GO:0000097 sulfur amino acid biosynthetic process | GO:0055114 oxidation-reduction process | GO:0000103 sulfate assimilation | GO:0031505 fungal-type cell wall organization | GO:0070814 hydrogen sulfide biosynthetic process	GO:0004783 sulfite reductase (NADPH) activity | GO:0051539 4 iron, 4 sulfur cluster binding | GO:0020037 heme binding | GO:0050661 NADP binding | GO:0010181 FMN binding | GO:0005506 iron ion binding	GO:0005829 cytosol | GO:0009337 sulfite reductase complex (NADPH)
CGLO_04203	36.2777	397.029	3.45209	Up	8.70236e-22	732	EQB55832	gi|530475828|gb|EQB55832.1|	hypothetical protein CGLO_04203 [Colletotrichum gloeosporioides Cg-14]	--	--	GO:0008152 metabolic process	GO:0016740 transferase activity	--
CGLO_07751	88.8473	34.5708	-1.36177	Down	0.0113365	1008	EQB52610	gi|530471903|gb|EQB52610.1|	short-chain dehydrogenase [Colletotrichum gloeosporioides Cg-14]	dha:DEHA2C15202g	DEHA2C15202p; K00218 protochlorophyllide reductase [EC:1.3.1.33]	GO:0055114 oxidation-reduction process	GO:0016491 oxidoreductase activity	--
CGLO_04080	4.22354	31.0703	2.87901	Up	3.40847e-05	1350	EQB55939	gi|530475962|gb|EQB55939.1|	hypothetical protein CGLO_04080 [Colletotrichum gloeosporioides Cg-14]	--	--	--	--	--
CGLO_04053	2.87429	12.335	2.10148	Up	0.0144527	1689	EQB55962	gi|530475990|gb|EQB55962.1|	hypothetical protein CGLO_04053 [Colletotrichum gloeosporioides Cg-14]	--	--	--	--	--
CGLO_04016	137.637	50.6143	-1.44325	Down	7.47517e-05	1266	EQB55996	gi|530476035|gb|EQB55996.1|	hypothetical protein CGLO_04016 [Colletotrichum gloeosporioides Cg-14]	afv:AFLA_066970	hypothetical protein; K19619 tyrosyl-DNA phosphodiesterase 2 [EC:3.1.4.-]	--	--	GO:0016021 integral component of membrane
CGLO_04015	1524.07	600.683	-1.34326	Down	5.40884e-05	786	EQB55995	gi|530476034|gb|EQB55995.1|	hypothetical protein CGLO_04015 [Colletotrichum gloeosporioides Cg-14]	mbe:MBM_06792	protein-tyrosine phosphatase; K01104 protein-tyrosine phosphatase [EC:3.1.3.48]	--	--	--
CGLO_15770	148.038	63.6229	-1.21834	Down	0.0158735	5304	EQB45369	gi|530462476|gb|EQB45369.1|	RNA-directed RNA polymerase [Colletotrichum gloeosporioides Cg-14]	ela:UCREL1_438	putative monooxygenase fad-binding protein; K00480 salicylate hydroxylase [EC:1.14.13.1]	GO:0001172 transcription, RNA-templated | GO:0055114 oxidation-reduction process	GO:0016491 oxidoreductase activity | GO:0003968 RNA-directed RNA polymerase activity | GO:0071949 FAD binding	--
CGLO_03992	8.33059	36.6553	2.13753	Up	0.00678973	1389	EQB56020	gi|530476065|gb|EQB56020.1|	hypothetical protein CGLO_03992 [Colletotrichum gloeosporioides Cg-14]	tmn:UCRPA7_7715	putative kama family protein; K01843 lysine 2,3-aminomutase [EC:5.4.3.2]	GO:0008152 metabolic process	GO:0003824 catalytic activity	--
CGLO_03982	33982.1	16473.7	-1.04461	Down	0.00542614	1269	EQB56032	gi|530476081|gb|EQB56032.1|	hypothetical protein CGLO_03982 [Colletotrichum gloeosporioides Cg-14]	cmt:CCM_09237	GPI-anchored cell wall beta-1,3-endoglucanase; K01199 glucan endo-1,3-beta-D-glucosidase [EC:3.2.1.39]	GO:0005975 carbohydrate metabolic process	--	--
CGLO_03969	43.5982	115.549	1.40617	Up	0.0040219	876	EQB56041	gi|530476094|gb|EQB56041.1|	hypothetical protein CGLO_03969 [Colletotrichum gloeosporioides Cg-14]	--	--	--	--	--
CGLO_03842	232.639	116.049	-1.00336	Down	0.0275924	1395	EQB56160	gi|530476230|gb|EQB56160.1|	hypothetical protein CGLO_03842 [Colletotrichum gloeosporioides Cg-14]	--	--	--	--	GO:0016021 integral component of membrane
CGLO_03775	5.01849	19.891	1.98679	Up	0.0158851	768	EQB56238	gi|530476318|gb|EQB56238.1|	hypothetical protein CGLO_03775 [Colletotrichum gloeosporioides Cg-14]	abe:ARB_05732	hypothetical protein; K04487 cysteine desulfurase [EC:2.8.1.7]	--	GO:0009055 electron carrier activity	--
CGLO_03692	43.9445	142.206	1.69423	Up	0.0136638	2412	EQB56299	gi|530476395|gb|EQB56299.1|	hypothetical protein CGLO_03692 [Colletotrichum gloeosporioides Cg-14]	--	--	--	--	--
CGLO_03609	636.46	298.814	-1.09082	Down	0.0107612	1779	EQB56383	gi|530476496|gb|EQB56383.1|	hypothetical protein CGLO_03609 [Colletotrichum gloeosporioides Cg-14]	--	--	--	--	GO:0016021 integral component of membrane
CGLO_03546	2057.22	893.197	-1.20364	Down	0.0397639	2175	EQB56445	gi|530476568|gb|EQB56445.1|	hypothetical protein CGLO_03546 [Colletotrichum gloeosporioides Cg-14]	tmn:UCRPA7_1502	putative glycogenin protein; K00750 glycogenin [EC:2.4.1.186]	GO:0008152 metabolic process	GO:0016757 transferase activity, transferring glycosyl groups	--
CGLO_03542	298.986	727.29	1.28245	Up	2.33993e-06	1002	EQB56468	gi|530476592|gb|EQB56468.1|	hypothetical protein CGLO_03542 [Colletotrichum gloeosporioides Cg-14]	--	--	--	--	GO:0016021 integral component of membrane
CGLO_03478	142.246	14.0005	-3.34484	Down	1.89763e-07	342	EQB56497	gi|530476628|gb|EQB56497.1|	hypothetical protein CGLO_03478 [Colletotrichum gloeosporioides Cg-14]	--	--	--	--	--
CGLO_03477	240.943	15.4113	-3.96663	Down	4.27807e-17	705	EQB56496	gi|530476627|gb|EQB56496.1|	hypothetical protein CGLO_03477 [Colletotrichum gloeosporioides Cg-14]	--	--	--	--	--
CGLO_03472	117.277	31.3265	-1.90446	Down	0.00595689	990	EQB56491	gi|530476622|gb|EQB56491.1|	hypothetical protein CGLO_03472 [Colletotrichum gloeosporioides Cg-14]	cpw:CPC735_038600	pirin domain containing protein; K06911 uncharacterized protein	GO:0008152 metabolic process	GO:0003824 catalytic activity	--
CGLO_03389	389.235	1538.82	1.98311	Up	4.37779e-08	816	EQB56591	gi|530476739|gb|EQB56591.1|	hypothetical protein CGLO_03389 [Colletotrichum gloeosporioides Cg-14]	--	--	GO:0006355 regulation of transcription, DNA-templated	GO:0043565 sequence-specific DNA binding | GO:0003700 transcription factor activity, sequence-specific DNA binding	--
CGLO_03378	3.31955	12.4513	1.90724	Up	0.0275341	1386	EQB56604	gi|530476758|gb|EQB56604.1|	hypothetical protein CGLO_03378 [Colletotrichum gloeosporioides Cg-14]	--	--	--	--	--
CGLO_03274	31.3489	5.17734	-2.59813	Down	0.000522914	2808	EQB56697	gi|530477075|gb|EQB56697.1|	hypothetical protein CGLO_03274 [Colletotrichum gloeosporioides Cg-14]	ela:UCREL1_2248	putative beta-glucosidase d protein; K05349 beta-glucosidase [EC:3.2.1.21]	GO:0005975 carbohydrate metabolic process	GO:0004553 hydrolase activity, hydrolyzing O-glycosyl compounds	--
CGLO_00678	2310.7	460.502	-2.32705	Down	8.56652e-11	2100	EQB58992	gi|530479885|gb|EQB58992.1|	phenol hydroxylase [Colletotrichum gloeosporioides Cg-14]	fpu:FPSE_05978	hypothetical protein; K03380 phenol 2-monooxygenase [EC:1.14.13.7]	GO:0055114 oxidation-reduction process	GO:0071949 FAD binding | GO:0004497 monooxygenase activity	--
CGLO_03176	59.5706	12.9368	-2.20312	Down	0.00355404	357	EQB56792	gi|530477185|gb|EQB56792.1|	hypothetical protein CGLO_03176 [Colletotrichum gloeosporioides Cg-14]	--	--	--	--	--
CGLO_03173	28.6201	248.68	3.11919	Up	1.05282e-11	915	EQB56789	gi|530477182|gb|EQB56789.1|	hypothetical protein CGLO_03173 [Colletotrichum gloeosporioides Cg-14]	--	--	GO:0008152 metabolic process	GO:0016787 hydrolase activity	--
CGLO_03101	97.1139	194.291	1.00047	Up	0.0459005	798	EQB56853	gi|530477262|gb|EQB56853.1|	hypothetical protein CGLO_03101 [Colletotrichum gloeosporioides Cg-14]	--	--	--	--	--
CGLO_03099	57.2276	196.684	1.78109	Up	8.62513e-09	1491	EQB56863	gi|530477273|gb|EQB56863.1|	hypothetical protein CGLO_03099 [Colletotrichum gloeosporioides Cg-14]	tpf:TPHA_0A06090	TPHA0A06090; hypothetical protein; K09246 arginine metabolism regulation protein II	GO:0006357 regulation of transcription from RNA polymerase II promoter	GO:0000981 RNA polymerase II transcription factor activity, sequence-specific DNA binding | GO:0008270 zinc ion binding	GO:0005634 nucleus
CGLO_03022	167.282	512.383	1.61494	Up	1.40715e-06	759	EQB56929	gi|530477353|gb|EQB56929.1|	hypothetical protein CGLO_03022 [Colletotrichum gloeosporioides Cg-14]	mbe:MBM_06792	protein-tyrosine phosphatase; K01104 protein-tyrosine phosphatase [EC:3.1.3.48]	--	--	--
CGLO_02965	232.098	86.1062	-1.43055	Down	0.049504	1083	EQB56974	gi|530477412|gb|EQB56974.1|	hypothetical protein CGLO_02965 [Colletotrichum gloeosporioides Cg-14]	npa:UCRNP2_9073	putative cyanide hydratase protein; K10675 cyanide hydratase [EC:4.2.1.66]	GO:0006807 nitrogen compound metabolic process	GO:0016810 hydrolase activity, acting on carbon-nitrogen (but not peptide) bonds	--
CGLO_02950	209.137	59.1746	-1.8214	Down	2.63572e-07	786	EQB56985	gi|530477426|gb|EQB56985.1|	hypothetical protein CGLO_02950 [Colletotrichum gloeosporioides Cg-14]	--	--	--	--	GO:0019028 viral capsid
CGLO_02932	24.9513	70.4592	1.49767	Up	0.00182482	813	EQB57005	gi|530477452|gb|EQB57005.1|	hypothetical protein CGLO_02932 [Colletotrichum gloeosporioides Cg-14]	--	--	--	--	--
CGLO_02897	8.66195	65.9483	2.92857	Up	1.27487e-07	330	EQB57029	gi|530477488|gb|EQB57029.1|	hypothetical protein CGLO_02897 [Colletotrichum gloeosporioides Cg-14]	--	--	--	--	--
CGLO_02864	69.2732	152.646	1.13982	Up	0.012309	912	EQB57059	gi|530477527|gb|EQB57059.1|	hypothetical protein CGLO_02864 [Colletotrichum gloeosporioides Cg-14]	ure:UREG_03101	similar to TPA: TPA_exp: CaaX protease; K08658 prenyl protein peptidase [EC:3.4.22.-]	--	--	--
CGLO_02842	68.554	157.318	1.19837	Up	0.0439421	1095	EQB57076	gi|530477549|gb|EQB57076.1|	hypothetical protein CGLO_02842 [Colletotrichum gloeosporioides Cg-14]	val:VDBG_01398	mitochondrial chaperone BCS1; K08900 mitochondrial chaperone BCS1	--	--	--
CGLO_02766	51.8747	14.8234	-1.80716	Down	0.0116399	933	EQB57129	gi|530477615|gb|EQB57129.1|	hypothetical protein CGLO_02766 [Colletotrichum gloeosporioides Cg-14]	--	--	--	--	--
CGLO_02751	279212	129141	-1.11242	Down	0.0179132	1116	EQB57155	gi|530477646|gb|EQB57155.1|	hypothetical protein CGLO_02751 [Colletotrichum gloeosporioides Cg-14]	nhe:NECHADRAFT_85261	hypothetical protein; K10675 cyanide hydratase [EC:4.2.1.66]	GO:0006807 nitrogen compound metabolic process	GO:0016810 hydrolase activity, acting on carbon-nitrogen (but not peptide) bonds	--
CGLO_02733	6.874	22.0087	1.67885	Up	0.0257318	1818	EQB57171	gi|530477666|gb|EQB57171.1|	hypothetical protein CGLO_02733 [Colletotrichum gloeosporioides Cg-14]	--	--	--	--	--
CGLO_02689	3.87566	24.8719	2.682	Up	6.80162e-05	294	EQB57220	gi|530477726|gb|EQB57220.1|	hypothetical protein CGLO_02689 [Colletotrichum gloeosporioides Cg-14]	--	--	--	--	--
CGLO_02684	528.155	238.163	-1.14901	Down	0.00317657	1128	EQB57215	gi|530477721|gb|EQB57215.1|	hypothetical protein CGLO_02684 [Colletotrichum gloeosporioides Cg-14]	--	--	--	--	--
CGLO_02627	666.111	1640.98	1.30072	Up	0.0161284	780	EQB57268	gi|530477784|gb|EQB57268.1|	hypothetical protein CGLO_02627 [Colletotrichum gloeosporioides Cg-14]	--	--	--	--	--
CGLO_02599	12568.5	6068.16	-1.05049	Down	0.00578403	4149	EQB57294	gi|530477817|gb|EQB57294.1|	hypothetical protein CGLO_02599 [Colletotrichum gloeosporioides Cg-14]	--	--	--	--	--
CGLO_02436	128.15	259.058	1.01544	Up	0.048339	2091	EQB57433	gi|530477990|gb|EQB57433.1|	hypothetical protein CGLO_02436 [Colletotrichum gloeosporioides Cg-14]	vda:VDAG_10092	mitochondrial chaperone BCS1; K08900 mitochondrial chaperone BCS1	--	GO:0005524 ATP binding	GO:0016021 integral component of membrane
CGLO_02333	226.957	522.454	1.20289	Up	0.044622	1491	EQB57525	gi|530478102|gb|EQB57525.1|	hypothetical protein CGLO_02333 [Colletotrichum gloeosporioides Cg-14]	cmt:CCM_02391	UV excision repair protein (RadW), putative; K10839 UV excision repair protein RAD23	--	--	GO:0016021 integral component of membrane
CGLO_02304	21.6627	70.3993	1.70035	Up	0.00323404	1503	EQB57547	gi|530478130|gb|EQB57547.1|	hypothetical protein CGLO_02304 [Colletotrichum gloeosporioides Cg-14]	afv:AFLA_048740	MFS transporter, putative; K13336 peroxin-3	GO:0055085 transmembrane transport	--	GO:0016021 integral component of membrane
CGLO_02213	10.0245	131.493	3.71339	Up	7.12759e-18	1632	EQB57641	gi|530478248|gb|EQB57641.1|	hypothetical protein CGLO_02213 [Colletotrichum gloeosporioides Cg-14]	scm:SCHCODRAFT_255991	hypothetical protein; K14859 ribosome biogenesis protein SSF1/2	GO:0008152 metabolic process	GO:0016874 ligase activity	--
CGLO_02180	16.5371	47.6247	1.52601	Up	0.0330506	1431	EQB57665	gi|530478280|gb|EQB57665.1|	hypothetical protein CGLO_02180 [Colletotrichum gloeosporioides Cg-14]	hir:HETIRDRAFT_445800	hypothetical protein; K10590 E3 ubiquitin-protein ligase TRIP12 [EC:2.3.2.26]	GO:0008152 metabolic process	GO:0030170 pyridoxal phosphate binding | GO:0008483 transaminase activity	--
CGLO_02019	12.6605	2.04162	-2.63255	Down	0.00090824	2376	EQB57811	gi|530478449|gb|EQB57811.1|	hypothetical protein CGLO_02019 [Colletotrichum gloeosporioides Cg-14]	fme:FOMMEDRAFT_116865	glycoside hydrolase family 95 protein; K15923 alpha-L-fucosidase 2 [EC:3.2.1.51]	GO:0008152 metabolic process	GO:0004560 alpha-L-fucosidase activity	--
CGLO_01991	149.177	61.9157	-1.26865	Down	0.0254517	1053	EQB57840	gi|530478483|gb|EQB57840.1|	hypothetical protein CGLO_01991 [Colletotrichum gloeosporioides Cg-14]	--	--	--	--	--
CGLO_01975	205.594	59.9519	-1.77792	Down	0.000326447	1542	EQB57854	gi|530478501|gb|EQB57854.1|	hypothetical protein CGLO_01975 [Colletotrichum gloeosporioides Cg-14]	--	--	GO:0006357 regulation of transcription from RNA polymerase II promoter	GO:0000981 RNA polymerase II transcription factor activity, sequence-specific DNA binding | GO:0008270 zinc ion binding	GO:0005634 nucleus
CGLO_01873	6.68739	21.2405	1.6673	Up	0.0204454	1068	EQB57940	gi|530478605|gb|EQB57940.1|	hypothetical protein CGLO_01873 [Colletotrichum gloeosporioides Cg-14]	--	--	--	--	--
CGLO_02542	232.393	75.9905	-1.61268	Down	0.0388462	1140	EQB57351	gi|530477892|gb|EQB57351.1|	oxidoreductase family protein [Colletotrichum gloeosporioides Cg-14]	wse:WALSEDRAFT_59406	NAD(P)-binding protein; K00010 myo-inositol 2-dehydrogenase / D-chiro-inositol 1-dehydrogenase [EC:1.1.1.18 1.1.1.369]	GO:0055114 oxidation-reduction process	GO:0016491 oxidoreductase activity	--
CGLO_01774	119.593	41.466	-1.52813	Down	0.0292957	1956	EQB58034	gi|530478716|gb|EQB58034.1|	hypothetical protein CGLO_01774 [Colletotrichum gloeosporioides Cg-14]	--	--	--	--	--
CGLO_01744	118.157	26.8509	-2.13767	Down	4.38472e-06	2610	EQB58054	gi|530478738|gb|EQB58054.1|	hypothetical protein CGLO_01744 [Colletotrichum gloeosporioides Cg-14]	npa:UCRNP2_8713	putative peptidase s8 s53 subtilisin kexin sedolisin protein; K01336 cerevisin [EC:3.4.21.48]	GO:0006508 proteolysis	GO:0004252 serine-type endopeptidase activity	--
CGLO_01684	8.23649	26.9929	1.71248	Up	0.0300704	2373	EQB58111	gi|530478807|gb|EQB58111.1|	hypothetical protein CGLO_01684 [Colletotrichum gloeosporioides Cg-14]	act:ACLA_004520	hypothetical protein; K01279 tripeptidyl-peptidase I [EC:3.4.14.9]	--	--	--
CGLO_01644	119.375	360.073	1.59279	Up	0.000408739	1365	EQB58139	gi|530478844|gb|EQB58139.1|	hypothetical protein CGLO_01644 [Colletotrichum gloeosporioides Cg-14]	--	--	--	--	GO:0016021 integral component of membrane
CGLO_01639	22.5264	79.7944	1.82467	Up	0.00702896	744	EQB58146	gi|530478853|gb|EQB58146.1|	hypothetical protein CGLO_01639 [Colletotrichum gloeosporioides Cg-14]	afm:AFUA_4G03700	GMP synthase; K01951 GMP synthase (glutamine-hydrolysing) [EC:6.3.5.2]	GO:0006541 glutamine metabolic process	GO:0016740 transferase activity	--
CGLO_01393	15.3936	47.3882	1.62219	Up	0.00520875	1926	EQB58364	gi|530479112|gb|EQB58364.1|	hypothetical protein CGLO_01393 [Colletotrichum gloeosporioides Cg-14]	fpu:FPSE_08102	hypothetical protein; K01930 folylpolyglutamate synthase [EC:6.3.2.17]	--	--	--
CGLO_01369	265.303	586.291	1.14398	Up	0.00170157	1335	EQB58394	gi|530479145|gb|EQB58394.1|	hypothetical protein CGLO_01369 [Colletotrichum gloeosporioides Cg-14]	--	--	--	--	--
CGLO_01349	321.104	792.19	1.30281	Up	0.00164339	1089	EQB58409	gi|530479164|gb|EQB58409.1|	hypothetical protein CGLO_01349 [Colletotrichum gloeosporioides Cg-14]	--	--	--	--	--
CGLO_01316	3.34529	30.0268	3.16605	Up	1.50706e-06	1887	EQB58441	gi|530479200|gb|EQB58441.1|	hypothetical protein CGLO_01316 [Colletotrichum gloeosporioides Cg-14]	maj:MAA_07124	Peptidase S33 tripeptidyl aminopeptidase-like protein; K08329 autophagy-related protein 17	--	--	GO:0016021 integral component of membrane
CGLO_01257	20.5657	1315.86	5.99962	Up	2.71435e-37	669	EQB58492	gi|530479262|gb|EQB58492.1|	hypothetical protein CGLO_01257 [Colletotrichum gloeosporioides Cg-14]	--	--	GO:0032259 methylation	GO:0008171 O-methyltransferase activity	--
CGLO_01153	185.118	530.38	1.51858	Up	4.18293e-07	747	EQB58577	gi|530479370|gb|EQB58577.1|	hypothetical protein CGLO_01153 [Colletotrichum gloeosporioides Cg-14]	--	--	--	--	--
CGLO_01133	1975.02	843.313	-1.22773	Down	3.5549e-06	1119	EQB58602	gi|530479402|gb|EQB58602.1|	hypothetical protein CGLO_01133 [Colletotrichum gloeosporioides Cg-14]	ani:AN9039.2	hypothetical protein; K01613 phosphatidylserine decarboxylase [EC:4.1.1.65]	--	--	GO:0016021 integral component of membrane
CGLO_01049	4.83834	23.3284	2.2695	Up	0.00206776	1023	EQB58681	gi|530479504|gb|EQB58681.1|	hypothetical protein CGLO_01049 [Colletotrichum gloeosporioides Cg-14]	--	--	--	GO:0046983 protein dimerization activity	--
CGLO_01010	8.45877	109.062	3.68855	Up	1.03768e-15	498	EQB58712	gi|530479539|gb|EQB58712.1|	hypothetical protein CGLO_01010 [Colletotrichum gloeosporioides Cg-14]	--	--	--	--	--
CGLO_00961	34.553	94.5594	1.45241	Up	0.00525759	1533	EQB58748	gi|530479587|gb|EQB58748.1|	hypothetical protein CGLO_00961 [Colletotrichum gloeosporioides Cg-14]	--	--	--	GO:0046872 metal ion binding	--
CGLO_00929	24.7061	68.4269	1.4697	Up	0.00910696	876	EQB58781	gi|530479630|gb|EQB58781.1|	hypothetical protein CGLO_00929 [Colletotrichum gloeosporioides Cg-14]	--	--	--	--	--
CGLO_00919	3.53697	28.5606	3.01344	Up	2.48987e-05	2364	EQB58771	gi|530479620|gb|EQB58771.1|	hypothetical protein CGLO_00919 [Colletotrichum gloeosporioides Cg-14]	aor:AOR_1_1366054	AO090011000816; hypothetical protein; K10981 DNA polymerase IV [EC:2.7.7.7]	--	--	GO:0016021 integral component of membrane
CGLO_13323	745.079	56.9103	-3.71063	Down	1.71519e-23	612	EQB47515	gi|530465448|gb|EQB47515.1|	nitroreductase [Colletotrichum gloeosporioides Cg-14]	smp:SMAC_02558	hypothetical protein; K07078 uncharacterized protein	GO:0055114 oxidation-reduction process	GO:0016491 oxidoreductase activity	--
CGLO_00905	4.94943	20.9656	2.08269	Up	0.00525759	801	EQB58791	gi|530479643|gb|EQB58791.1|	hypothetical protein CGLO_00905 [Colletotrichum gloeosporioides Cg-14]	nhe:NECHADRAFT_94329	hypothetical protein; K06130 lysophospholipase II [EC:3.1.1.5]	GO:0008152 metabolic process	GO:0016787 hydrolase activity	--
CGLO_00786	30.8626	81.7381	1.40515	Up	0.00154018	2325	EQB58902	gi|530479774|gb|EQB58902.1|	hypothetical protein CGLO_00786 [Colletotrichum gloeosporioides Cg-14]	--	--	--	--	--
CGLO_00785	34.974	131.425	1.90988	Up	0.000949952	888	EQB58901	gi|530479773|gb|EQB58901.1|	hypothetical protein CGLO_00785 [Colletotrichum gloeosporioides Cg-14]	--	--	GO:0032259 methylation	GO:0008168 methyltransferase activity	GO:0016021 integral component of membrane
CGLO_00677	214.855	23.4928	-3.19307	Down	1.99294e-11	1248	EQB58991	gi|530479884|gb|EQB58991.1|	hypothetical protein CGLO_00677 [Colletotrichum gloeosporioides Cg-14]	smp:SMAC_07153	hypothetical protein; K03380 phenol 2-monooxygenase [EC:1.14.13.7]	--	--	GO:0016021 integral component of membrane
CGLO_00676	66.74	12.4491	-2.42251	Down	1.32665e-05	2757	EQB58990	gi|530479883|gb|EQB58990.1|	hypothetical protein CGLO_00676 [Colletotrichum gloeosporioides Cg-14]	pgr:PGTG_12109	hypothetical protein; K01336 cerevisin [EC:3.4.21.48]	GO:0006508 proteolysis	GO:0004252 serine-type endopeptidase activity	GO:0016020 membrane | GO:0005618 cell wall
CGLO_00613	12.4256	37.8734	1.60787	Up	0.0217331	375	EQB59053	gi|530479960|gb|EQB59053.1|	hypothetical protein CGLO_00613 [Colletotrichum gloeosporioides Cg-14]	--	--	--	--	GO:0016021 integral component of membrane
CGLO_07636	150.502	55.5057	-1.43907	Down	0.000326447	1110	EQB52718	gi|530472036|gb|EQB52718.1|	NADH:flavin oxidoreductase/NADH oxidase [Colletotrichum gloeosporioides Cg-14]	aor:AOR_1_1170174	AO090005000673; NADH:flavin oxidoreductase/NADH oxidase family protein; K00354 NADPH2 dehydrogenase [EC:1.6.99.1]	GO:0055114 oxidation-reduction process	GO:0016491 oxidoreductase activity | GO:0010181 FMN binding	--
CGLO_00416	44.4077	248.596	2.48492	Up	2.42116e-14	1005	EQB59226	gi|530480172|gb|EQB59226.1|	hypothetical protein CGLO_00416 [Colletotrichum gloeosporioides Cg-14]	--	--	--	--	GO:0016021 integral component of membrane
CGLO_00393	12.4702	78.3577	2.65159	Up	0.000440387	1638	EQB59255	gi|530480206|gb|EQB59255.1|	hypothetical protein CGLO_00393 [Colletotrichum gloeosporioides Cg-14]	ela:UCREL1_8805	putative general substrate transporter protein; K01487 guanine deaminase [EC:3.5.4.3]	GO:0055085 transmembrane transport | GO:0008643 carbohydrate transport	GO:0022857 transmembrane transporter activity	GO:0016021 integral component of membrane
CGLO_11527	9267.9	2842.53	-1.70507	Down	0.0130529	1236	EQB49134	gi|530467584|gb|EQB49134.1|	NADH:flavin oxidoreductase/NADH oxidase [Colletotrichum gloeosporioides Cg-14]	bze:COCCADRAFT_102377	hypothetical protein; K00354 NADPH2 dehydrogenase [EC:1.6.99.1]	GO:0055114 oxidation-reduction process	GO:0016491 oxidoreductase activity | GO:0010181 FMN binding	--
CGLO_00166	6.11601	25.2965	2.04827	Up	0.0186499	1209	EQB59442	gi|530480450|gb|EQB59442.1|	hypothetical protein CGLO_00166 [Colletotrichum gloeosporioides Cg-14]	vda:VDAG_07477	mannan endo-1,4-beta-mannosidase; K19355 mannan endo-1,4-beta-mannosidase [EC:3.2.1.78]	GO:0005975 carbohydrate metabolic process	GO:0004553 hydrolase activity, hydrolyzing O-glycosyl compounds	--
CGLO_00165	55.7531	187.182	1.74732	Up	0.0205583	1158	EQB59441	gi|530480449|gb|EQB59441.1|	hypothetical protein CGLO_00165 [Colletotrichum gloeosporioides Cg-14]	--	--	--	--	GO:0016021 integral component of membrane
CGLO_00164	9.63253	41.649	2.11229	Up	0.000331291	1218	EQB59440	gi|530480448|gb|EQB59440.1|	hypothetical protein CGLO_00164 [Colletotrichum gloeosporioides Cg-14]	--	--	GO:0006357 regulation of transcription from RNA polymerase II promoter	GO:0000981 RNA polymerase II transcription factor activity, sequence-specific DNA binding | GO:0008270 zinc ion binding	GO:0005634 nucleus
CGLO_00134	76.0604	711.822	3.2263	Up	2.20371e-12	2436	EQB59467	gi|530480484|gb|EQB59467.1|	hypothetical protein CGLO_00134 [Colletotrichum gloeosporioides Cg-14]	bze:COCCADRAFT_9409	glycoside hydrolase family 16 protein; K00767 nicotinate-nucleotide pyrophosphorylase (carboxylating) [EC:2.4.2.19]	GO:0005975 carbohydrate metabolic process	GO:0042973 glucan endo-1,3-beta-D-glucosidase activity	--
CGLO_01434	8755.77	3356.11	-1.38345	Down	0.000814492	909	EQB58320	gi|596661403|ref|XP_007275175.1|	hypothetical protein CGGC5_4642 [Colletotrichum gloeosporioides Nara gc5] >gi|429861056|gb|ELA35767.1| hypothetical protein CGGC5_4642 [Colletotrichum gloeosporioides Nara gc5] >gi|530479062|gb|EQB58320.1| hypothetical protein CGLO_01434 [Colletotrichum gloeosporioides Cg-14]	--	--	--	--	--
CGLO_03931	3.02127	29.1622	3.27087	Up	1.03287e-06	381	EQB56092	gi|530476148|gb|EQB56092.1|	HypE protein [Colletotrichum gloeosporioides Cg-14]	--	--	--	--	GO:0016020 membrane
CGLO_13661	99.8686	46.8175	-1.09298	Down	0.0464005	3855	EQB47218	gi|530465021|gb|EQB47218.1|	hydantoinase B/oxoprolinase [Colletotrichum gloeosporioides Cg-14]	nhe:NECHADRAFT_54297	hypothetical protein; K01469 5-oxoprolinase (ATP-hydrolysing) [EC:3.5.2.9]	GO:0008152 metabolic process	GO:0016787 hydrolase activity	--
CGLO_14348	2705.62	582.974	-2.21446	Down	2.41725e-09	3849	EQB46589	gi|530464111|gb|EQB46589.1|	hydantoinase B/oxoprolinase [Colletotrichum gloeosporioides Cg-14]	maj:MAA_04606	5-oxo-L-prolinase; K01469 5-oxoprolinase (ATP-hydrolysing) [EC:3.5.2.9]	GO:0008152 metabolic process	GO:0016787 hydrolase activity	--
CGLO_16073	75.9739	154.472	1.02377	Up	0.0169892	3825	EQB45118	gi|530462156|gb|EQB45118.1|	hsp90-like protein [Colletotrichum gloeosporioides Cg-14]	ssl:SS1G_09016	hypothetical protein; K20168 TBC1 domain family member 15	GO:0000160 phosphorelay signal transduction system | GO:0023014 signal transduction by protein phosphorylation	GO:0000155 phosphorelay sensor kinase activity	GO:0005622 intracellular
CGLO_16031	61.6395	15.5542	-1.98655	Down	0.00209497	867	EQB45132	gi|530462178|gb|EQB45132.1|	HPP family protein [Colletotrichum gloeosporioides Cg-14]	wic:J056_002527	putative actin-related protein 8; K11673 actin-related protein 8	--	--	GO:0016021 integral component of membrane
CGLO_07909	114.868	2650.41	4.52817	Up	1.01983e-39	975	EQB52464	gi|530471724|gb|EQB52464.1|	HpcH/HpaI aldolase/citrate lyase family protein [Colletotrichum gloeosporioides Cg-14]	tre:TRIREDRAFT_112125	hypothetical protein; K02510 4-hydroxy-2-oxoheptanedioate aldolase [EC:4.1.2.52]	GO:0008152 metabolic process	GO:0016829 lyase activity	--
CGLO_00436	10.0683	2.71542	-1.89058	Down	0.038872	1041	EQB59219	gi|530480163|gb|EQB59219.1|	NAD dependent epimerase/dehydratase [Colletotrichum gloeosporioides Cg-14]	spaa:SPAPADRAFT_60483	hypothetical protein; K17741 NADPH-dependent methylglyoxal reductase [EC:1.1.1.283]	GO:0006694 steroid biosynthetic process | GO:0055114 oxidation-reduction process	GO:0050662 coenzyme binding | GO:0003854 3-beta-hydroxy-delta5-steroid dehydrogenase activity	--
CGLO_04975	131.514	59.5547	-1.14293	Down	0.0337742	1137	EQB55134	gi|530474989|gb|EQB55134.1|	HhH-GPD superfamily base excision DNA repair protein [Colletotrichum gloeosporioides Cg-14]	maj:MAA_02902	hypothetical protein; K10773 endonuclease III [EC:4.2.99.18]	GO:0006285 base-excision repair, AP site formation	GO:0000703 oxidized pyrimidine nucleobase lesion DNA N-glycosylase activity | GO:0046872 metal ion binding | GO:0003677 DNA binding | GO:0051539 4 iron, 4 sulfur cluster binding	GO:0005634 nucleus | GO:0005739 mitochondrion
CGLO_16669	17.3619	43.3736	1.3209	Up	0.0313165	2640	EQB44570	gi|530461464|gb|EQB44570.1|	heterokaryon incompatibility protein [Colletotrichum gloeosporioides Cg-14]	npa:UCRNP2_890	putative leucyl-trna synthetase protein; K01869 leucyl-tRNA synthetase [EC:6.1.1.4]	--	--	--
CGLO_04319	32.0459	78.484	1.29226	Up	0.00871115	1824	EQB55729	gi|530475703|gb|EQB55729.1|	HET domain-containing protein [Colletotrichum gloeosporioides Cg-14]	fpu:FPSE_08102	hypothetical protein; K01930 folylpolyglutamate synthase [EC:6.3.2.17]	--	--	--
CGLO_16144	699.241	1853.81	1.40663	Up	0.000377255	738	EQB45035	gi|530462055|gb|EQB45035.1|	haloacid dehalogenase-like hydrolase [Colletotrichum gloeosporioides Cg-14]	pno:SNOG_14964	hypothetical protein; K17623 pseudouridine 5'-phosphatase [EC:3.1.3.96]	GO:0008152 metabolic process	GO:0016787 hydrolase activity	--
CGLO_12829	47.867	170.342	1.83133	Up	6.89257e-05	678	EQB47985	gi|530466069|gb|EQB47985.1|	haloacid dehalogenase [Colletotrichum gloeosporioides Cg-14]	mgr:MGG_01809	haloacid dehalogenase; K01560 2-haloacid dehalogenase [EC:3.8.1.2]	GO:0008152 metabolic process	GO:0016787 hydrolase activity	--
CGLO_06370	199.375	71.4461	-1.48056	Down	0.00578403	1473	EQB53870	gi|530473432|gb|EQB53870.1|	monooxygenase [Colletotrichum gloeosporioides Cg-14]	nfi:NFIA_041810	monooxygenase; K03379 cyclohexanone monooxygenase [EC:1.14.13.22]	GO:0055114 oxidation-reduction process	GO:0004497 monooxygenase activity	--
CGLO_18018	10.0842	2.66622	-1.91923	Down	0.0329419	1158	EQB43339	gi|530459861|gb|EQB43339.1|	hypothetical protein CGLO_18018 [Colletotrichum gloeosporioides Cg-14]	--	--	GO:0055114 oxidation-reduction process	GO:0051213 dioxygenase activity	--
CGLO_16504	83.1836	5.91051	-3.81494	Down	1.2987e-12	1812	EQB44725	gi|530461660|gb|EQB44725.1|	hypothetical protein CGLO_16504 [Colletotrichum gloeosporioides Cg-14]	--	--	GO:0055114 oxidation-reduction process	GO:0016491 oxidoreductase activity	--
CGLO_16356	53.7226	19.8251	-1.4382	Down	0.00281023	1755	EQB44860	gi|530461835|gb|EQB44860.1|	hypothetical protein CGLO_16356 [Colletotrichum gloeosporioides Cg-14]	abp:AGABI1DRAFT116551	AGABI1DRAFT_116551; hypothetical protein; K19791 iron transport multicopper oxidase	GO:0055114 oxidation-reduction process	GO:0016491 oxidoreductase activity | GO:0005507 copper ion binding	--
CGLO_03137	438.996	216.941	-1.0169	Down	0.0391167	1065	EQB56820	gi|530477219|gb|EQB56820.1|	glycylpeptide N-tetradecanoyltransferase [Colletotrichum gloeosporioides Cg-14]	nte:NEUTE1DRAFT123655	NEUTE1DRAFT_123655; glycylpeptide N-tetradecanoyltransferase; K00671 glycylpeptide N-tetradecanoyltransferase [EC:2.3.1.97]	GO:0008152 metabolic process	GO:0016787 hydrolase activity | GO:0016740 transferase activity	--
CGLO_11408	40.8335	167.208	2.03382	Up	0.000387685	1236	EQB49275	gi|530467758|gb|EQB49275.1|	glycosyltransferase family 25 [Colletotrichum gloeosporioides Cg-14]	--	--	GO:0008152 metabolic process	GO:0016740 transferase activity	GO:0016021 integral component of membrane
CGLO_04723	250.548	66.141	-1.92147	Down	3.65155e-06	1113	EQB55366	gi|530475267|gb|EQB55366.1|	glycosyltransferase family 17 [Colletotrichum gloeosporioides Cg-14]	tmn:UCRPA7_6913	putative glycosyl transferase family 17 protein; K00737 beta-1,4-mannosyl-glycoprotein beta-1,4-N-acetylglucosaminyltransferase [EC:2.4.1.144]	GO:0006487 protein N-linked glycosylation	GO:0003830 beta-1,4-mannosylglycoprotein 4-beta-N-acetylglucosaminyltransferase activity	GO:0016021 integral component of membrane
CGLO_02120	54.0095	15.6324	-1.78867	Down	0.00099145	2454	EQB57720	gi|530478346|gb|EQB57720.1|	glycosyl hydrolase family 92 [Colletotrichum gloeosporioides Cg-14]	--	--	GO:0005975 carbohydrate metabolic process	GO:0016787 hydrolase activity | GO:0030246 carbohydrate binding	--
CGLO_11933	265.142	44.1635	-2.58584	Down	1.86018e-07	1371	EQB48817	gi|530467141|gb|EQB48817.1|	glycosyl hydrolase family 76 [Colletotrichum gloeosporioides Cg-14]	nhe:NECHADRAFT_123408	hypothetical protein; K08257 mannan endo-1,6-alpha-mannosidase [EC:3.2.1.101]	GO:0006357 regulation of transcription from RNA polymerase II promoter | GO:0016052 carbohydrate catabolic process	GO:0008270 zinc ion binding | GO:0000981 RNA polymerase II transcription factor activity, sequence-specific DNA binding | GO:0003677 DNA binding | GO:0008496 mannan endo-1,6-alpha-mannosidase activity	GO:0005634 nucleus
CGLO_08516	122.429	309.838	1.33957	Up	8.46361e-05	999	EQB51904	gi|530471039|gb|EQB51904.1|	glycosyl hydrolase family 61 [Colletotrichum gloeosporioides Cg-14]	mrr:Moror_12809	glycoside hydrolase family 61 protein; K19356 cellulase [EC:3.2.1.4]	GO:0008152 metabolic process	GO:0016787 hydrolase activity	--
CGLO_16401	24.1522	80.4404	1.73577	Up	0.00569753	1614	EQB44802	gi|530461767|gb|EQB44802.1|	glycosyl hydrolase family 43 [Colletotrichum gloeosporioides Cg-14]	val:VDBG_07581	beta-xylosidase; K01198 xylan 1,4-beta-xylosidase [EC:3.2.1.37]	GO:0005975 carbohydrate metabolic process	GO:0004553 hydrolase activity, hydrolyzing O-glycosyl compounds	--
CGLO_16446	4663.13	2150.53	-1.11661	Down	0.0354011	2565	EQB44761	gi|530461717|gb|EQB44761.1|	glycosyl hydrolase family 2 [Colletotrichum gloeosporioides Cg-14]	tmn:UCRPA7_8484	putative glycoside hydrolase family 2 protein; K01192 beta-mannosidase [EC:3.2.1.25]	GO:0005975 carbohydrate metabolic process	GO:0004553 hydrolase activity, hydrolyzing O-glycosyl compounds	--
CGLO_06679	17909.3	7971.13	-1.16785	Down	0.00525759	1320	EQB53595	gi|530473107|gb|EQB53595.1|	glycosyl hydrolase family 18 [Colletotrichum gloeosporioides Cg-14]	afm:AFUA_3G07160	class V chitinase; K01183 chitinase [EC:3.2.1.14]	GO:0005975 carbohydrate metabolic process | GO:0006032 chitin catabolic process	GO:0004568 chitinase activity | GO:0008061 chitin binding	--
CGLO_13789	5457.15	2176.87	-1.32589	Down	5.43505e-07	1245	EQB47104	gi|530464851|gb|EQB47104.1|	glycosyl hydrolase family 18 [Colletotrichum gloeosporioides Cg-14]	nhe:NECHADRAFT_46346	hypothetical protein; K01183 chitinase [EC:3.2.1.14]	GO:0005975 carbohydrate metabolic process | GO:0006032 chitin catabolic process	GO:0004568 chitinase activity	--
CGLO_01052	1960.67	4908.51	1.32394	Up	0.00134246	540	EQB58684	gi|530479507|gb|EQB58684.1|	glycosyl hydrolase family 10 [Colletotrichum gloeosporioides Cg-14]	val:VDBG_09510	endo-1,4-beta-xylanase; K01181 endo-1,4-beta-xylanase [EC:3.2.1.8]	GO:0045493 xylan catabolic process	GO:0031176 endo-1,4-beta-xylanase activity	--
CGLO_07896	20.5965	218.224	3.40534	Up	1.16431e-15	3888	EQB52469	gi|530471731|gb|EQB52469.1|	glycoprotein X [Colletotrichum gloeosporioides Cg-14]	--	--	--	--	--
CGLO_15700	53868.8	26856	-1.00421	Down	0.00277602	1362	EQB45424	gi|530462552|gb|EQB45424.1|	glycolipid anchored surface protein [Colletotrichum gloeosporioides Cg-14]	--	--	GO:0006074 (1->3)-beta-D-glucan metabolic process	GO:0042124 1,3-beta-glucanosyltransferase activity	GO:0031225 anchored component of membrane | GO:0009277 fungal-type cell wall | GO:0005886 plasma membrane
CGLO_16084	5488.04	2663.34	-1.04305	Down	0.00626873	3477	EQB45096	gi|530462132|gb|EQB45096.1|	glycerophosphoryl diester phosphodiesterase [Colletotrichum gloeosporioides Cg-14]	vda:VDAG_02025	glycerophosphodiester phosphodiesterase GDE1; K18696 glycerophosphodiester phosphodiesterase [EC:3.1.4.46]	GO:0046475 glycerophospholipid catabolic process	GO:0047389 glycerophosphocholine phosphodiesterase activity	GO:0005840 ribosome
CGLO_05635	1644.46	369.031	-2.1558	Down	4.17024e-06	1422	EQB54530	gi|530474264|gb|EQB54530.1|	glutathionylspermidine synthase [Colletotrichum gloeosporioides Cg-14]	--	--	--	--	--
CGLO_18084	105.264	51.2243	-1.03911	Down	0.0170411	369	EQB43273	gi|596670912|ref|XP_007276951.1|	glutathione-dependent formaldehyde- gfa [Colletotrichum gloeosporioides Nara gc5] >gi|429859196|gb|ELA33985.1| glutathione-dependent formaldehyde- gfa [Colletotrichum gloeosporioides Nara gc5] >gi|530459761|gb|EQB43273.1| glutathione-dependent formaldehyde-activating enzyme [Colletotrichum gloeosporioides Cg-14]	--	--	GO:0008152 metabolic process	GO:0016846 carbon-sulfur lyase activity	--
CGLO_16355	124.806	40.2625	-1.63218	Down	0.00164339	1959	EQB44859	gi|530461834|gb|EQB44859.1|	hypothetical protein CGLO_16355 [Colletotrichum gloeosporioides Cg-14]	abv:AGABI2DRAFT239441	lcc11, AGABI2DRAFT_239441; laccase-11; K19791 iron transport multicopper oxidase	GO:0055114 oxidation-reduction process	GO:0005507 copper ion binding | GO:0016491 oxidoreductase activity	GO:0016021 integral component of membrane
CGLO_08597	808.799	388.113	-1.0593	Down	0.0300434	1140	EQB51837	gi|530470956|gb|EQB51837.1|	glucose N-acetyltransferase [Colletotrichum gloeosporioides Cg-14]	pte:PTT_13388	hypothetical protein; K11095 U1 small nuclear ribonucleoprotein C	GO:0006487 protein N-linked glycosylation	GO:0008375 acetylglucosaminyltransferase activity	GO:0005794 Golgi apparatus | GO:0016021 integral component of membrane
CGLO_15407	102.698	33.0657	-1.63499	Down	6.34237e-05	789	EQB45690	gi|530462875|gb|EQB45690.1|	glucan 1,3-beta-glucosidase [Colletotrichum gloeosporioides Cg-14]	afm:AFUA_1G14450	exo-beta-1,3-glucanase Exg0; K01210 glucan 1,3-beta-glucosidase [EC:3.2.1.58]	--	--	--
CGLO_04848	4.38558	17.8388	2.02418	Up	0.0129997	1827	EQB55245	gi|530475122|gb|EQB55245.1|	fungal specific transcription factor domain-containing protein [Colletotrichum gloeosporioides Cg-14]	aor:AOR_1_226154	AO090003000130; hypothetical protein; K01426 amidase [EC:3.5.1.4]	GO:0006351 transcription, DNA-templated	GO:0003677 DNA binding | GO:0008270 zinc ion binding	GO:0016021 integral component of membrane | GO:0005634 nucleus
CGLO_11273	196.256	56.9116	-1.78594	Down	0.000236593	2190	EQB49402	gi|530467912|gb|EQB49402.1|	fungal cellulose binding domain-containing protein [Colletotrichum gloeosporioides Cg-14]	nhe:NECHADRAFT_53608	hypothetical protein; K18578 xyloglucan-specific exo-beta-1,4-glucanase [EC:3.2.1.155]	GO:0008152 metabolic process	GO:0016787 hydrolase activity	--
CGLO_11115	104.712	5.185	-4.33594	Down	4.84428e-11	756	EQB49523	gi|530468078|gb|EQB49523.1|	fungal cellulose binding domain-containing protein [Colletotrichum gloeosporioides Cg-14]	ncr:NCU08760	gh61-5; glycosylhydrolase family 61-5; K19356 cellulase [EC:3.2.1.4]	--	--	--
CGLO_13438	347.109	155.712	-1.15651	Down	8.46361e-05	663	EQB47428	gi|530465307|gb|EQB47428.1|	flavoprotein [Colletotrichum gloeosporioides Cg-14]	aor:AOR_1_2346154	AO090003001332; flavoprotein; K01598 phosphopantothenoylcysteine decarboxylase [EC:4.1.1.36]	GO:0008152 metabolic process	GO:0003824 catalytic activity	--
CGLO_14150	602.285	168.949	-1.83386	Down	0.000377255	5553	EQB46771	gi|530464357|gb|EQB46771.1|	hypothetical protein CGLO_14150 [Colletotrichum gloeosporioides Cg-14]	ani:AN2547.2	hypothetical protein; K15419 emericellamide biosynthesis, highly reducing iterative type I polyketide synthase	GO:0055114 oxidation-reduction process	GO:0016740 transferase activity | GO:0016491 oxidoreductase activity	--
CGLO_13882	54.1652	22.6296	-1.25916	Down	0.0444683	1899	EQB47031	gi|530464747|gb|EQB47031.1|	hypothetical protein CGLO_13882 [Colletotrichum gloeosporioides Cg-14]	pfj:MYCFIDRAFT_26387	hypothetical protein; K03379 cyclohexanone monooxygenase [EC:1.14.13.22]	GO:0055114 oxidation-reduction process	GO:0004497 monooxygenase activity	--
CGLO_08686	4267.95	1894.19	-1.17196	Down	1.02723e-06	2334	EQB51753	gi|530470854|gb|EQB51753.1|	ferric reductase transmembrane component 4 [Colletotrichum gloeosporioides Cg-14]	afm:AFUA_1G17270	FRE family ferric-chelate reductase; K00521 ferric-chelate reductase [EC:1.16.1.7]	--	--	GO:0016021 integral component of membrane
CGLO_08680	4577.81	822.405	-2.47674	Down	2.17311e-14	2076	EQB51747	gi|530470848|gb|EQB51747.1|	hypothetical protein CGLO_08680 [Colletotrichum gloeosporioides Cg-14]	pic:PICST_57042	OPR1; 12-oxophytodienoate reductase 1 (12-oxophytodienoate-10,11-reductase 1) (OPDA-reductase 1) (AtOPR1) (FS-AT-I) (OYE); K00354 NADPH2 dehydrogenase [EC:1.6.99.1]	GO:0055114 oxidation-reduction process	GO:0016491 oxidoreductase activity | GO:0010181 FMN binding	--
CGLO_15221	2.17717	10.5667	2.27899	Up	0.0060727	1554	EQB45854	gi|530463081|gb|EQB45854.1|	fatty acid desaturase [Colletotrichum gloeosporioides Cg-14]	ela:UCREL1_9584	putative fatty acid desaturase protein; K13076 Delta8-fatty-acid desaturase [EC:1.14.19.4]	GO:0006468 protein phosphorylation	GO:0004672 protein kinase activity | GO:0005524 ATP binding	GO:0016021 integral component of membrane
CGLO_00646	3682.7	1696.8	-1.11795	Down	4.71319e-05	1299	EQB59032	gi|530479933|gb|EQB59032.1|	fasciclin domain-containing protein [Colletotrichum gloeosporioides Cg-14]	mrr:Moror_457	carnitine acyl carnitine carrier; K15109 solute carrier family 25 (mitochondrial carnitine/acylcarnitine transporter), member 20/29	--	--	--
CGLO_08564	1558.01	721.394	-1.11085	Down	0.0001529	801	EQB51853	gi|530470977|gb|EQB51853.1|	hypothetical protein CGLO_08564 [Colletotrichum gloeosporioides Cg-14]	val:VDBG_02657	L-xylulose reductase; K17742 sorbose reductase [EC:1.1.1.289]	GO:0055114 oxidation-reduction process	GO:0016491 oxidoreductase activity	--
CGLO_08008	7746.43	2223.62	-1.80062	Down	0.00169173	1140	EQB52370	gi|530471613|gb|EQB52370.1|	hypothetical protein CGLO_08008 [Colletotrichum gloeosporioides Cg-14]	aor:AOR_1_822054	AO090011000486; dihydrolipoyl dehydrogenase; K00382 dihydrolipoamide dehydrogenase [EC:1.8.1.4]	GO:0055114 oxidation-reduction process	GO:0016491 oxidoreductase activity	--
CGLO_07476	176.721	78.1779	-1.17664	Down	0.00149215	900	EQB52872	gi|530472226|gb|EQB52872.1|	hypothetical protein CGLO_07476 [Colletotrichum gloeosporioides Cg-14]	val:VDBG_06427	NADPH-dependent 1-acyldihydroxyacetone phosphate reductase; K06123 1-acylglycerone phosphate reductase [EC:1.1.1.101]	GO:0055114 oxidation-reduction process	GO:0016491 oxidoreductase activity	--
CGLO_07308	123.505	42.7381	-1.53098	Down	2.54865e-05	798	EQB53024	gi|530472404|gb|EQB53024.1|	hypothetical protein CGLO_07308 [Colletotrichum gloeosporioides Cg-14]	tmn:UCRPA7_5977	putative gentisate -dioxygenase protein; K00450 gentisate 1,2-dioxygenase [EC:1.13.11.4]	GO:0055114 oxidation-reduction process	GO:0071949 FAD binding | GO:0016491 oxidoreductase activity	GO:0016021 integral component of membrane
CGLO_06150	66.0116	14.3963	-2.19702	Down	8.61619e-06	1503	EQB54061	gi|530473678|gb|EQB54061.1|	hypothetical protein CGLO_06150 [Colletotrichum gloeosporioides Cg-14]	ani:AN7355.2	hypothetical protein; K15454 tRNA pseudouridine synthase 9 [EC:5.4.99.-]	GO:0055114 oxidation-reduction process	GO:0050660 flavin adenine dinucleotide binding | GO:0016614 oxidoreductase activity, acting on CH-OH group of donors	--
CGLO_05805	62.9879	11.9577	-2.39714	Down	0.00360683	1041	EQB54392	gi|530474091|gb|EQB54392.1|	hypothetical protein CGLO_05805 [Colletotrichum gloeosporioides Cg-14]	maw:MAC_05152	quinone oxidoreductase, putative; K00344 NADPH2:quinone reductase [EC:1.6.5.5]	GO:0055114 oxidation-reduction process	GO:0008270 zinc ion binding | GO:0016491 oxidoreductase activity	--
CGLO_05086	2488.92	713.166	-1.80321	Down	0.000857853	879	EQB55013	gi|530474846|gb|EQB55013.1|	hypothetical protein CGLO_05086 [Colletotrichum gloeosporioides Cg-14]	ncr:NCU08044	oxidoreductase; K16066 3-hydroxy acid dehydrogenase / malonic semialdehyde reductase [EC:1.1.1.381 1.1.1.-]	GO:0055114 oxidation-reduction process	GO:0016491 oxidoreductase activity	--
CGLO_04695	857.337	319.791	-1.42273	Down	0.00139445	1524	EQB55381	gi|530475288|gb|EQB55381.1|	hypothetical protein CGLO_04695 [Colletotrichum gloeosporioides Cg-14]	maw:MAC_08104	3-octaprenyl-4-hydroxybenzoate carboxy-lyase, putative; K20039 phenacrylate decarboxylase [EC:4.1.1.102]	GO:0046281 cinnamic acid catabolic process | GO:0055114 oxidation-reduction process | GO:0033494 ferulate metabolic process	GO:0046872 metal ion binding | GO:0016491 oxidoreductase activity | GO:0016831 carboxy-lyase activity | GO:0010181 FMN binding	GO:0005737 cytoplasm
CGLO_03252	2525.44	956.833	-1.40019	Down	0.000135829	1773	EQB56726	gi|530477108|gb|EQB56726.1|	hypothetical protein CGLO_03252 [Colletotrichum gloeosporioides Cg-14]	tms:TREMEDRAFT_24464	hypothetical protein; K00022 3-hydroxyacyl-CoA dehydrogenase [EC:1.1.1.35]	GO:0006631 fatty acid metabolic process | GO:0055114 oxidation-reduction process	GO:0003857 3-hydroxyacyl-CoA dehydrogenase activity	--
CGLO_12490	10.201	76.7611	2.91166	Up	2.85772e-10	3930	EQB48291	gi|530466488|gb|EQB48291.1|	exo-1,3-beta-D-glucanase [Colletotrichum gloeosporioides Cg-14]	cpw:CPC735_009860	beta-1,3-glucanase, putative; K01210 glucan 1,3-beta-glucosidase [EC:3.2.1.58]	--	--	--
CGLO_13382	2668.32	7358.66	1.46351	Up	5.64377e-05	5274	EQB47470	gi|530465375|gb|EQB47470.1|	exo-1,3-beta-D-glucanase [Colletotrichum gloeosporioides Cg-14]	ssl:SS1G_09858	hypothetical protein; K01210 glucan 1,3-beta-glucosidase [EC:3.2.1.58]	--	--	--
CGLO_00179	12.9353	3.61521	-1.83916	Down	0.0429388	1218	EQB59432	gi|530480438|gb|EQB59432.1|	epoxide hydrolase [Colletotrichum gloeosporioides Cg-14]	ang:ANI_1_312144	An16g02170; epoxide hydrolase; K01253 microsomal epoxide hydrolase [EC:3.3.2.9]	GO:0008152 metabolic process	GO:0033961 cis-stilbene-oxide hydrolase activity	--
CGLO_00460	264.132	87.2303	-1.59836	Down	0.0113035	1380	EQB59185	gi|530480123|gb|EQB59185.1|	hypothetical protein CGLO_00460 [Colletotrichum gloeosporioides Cg-14]	tmn:UCRPA7_3289	putative bifunctional p-450:nadph-p450 reductase protein; K14338 cytochrome P450 / NADPH-cytochrome P450 reductase [EC:1.14.14.1 1.6.2.4]	GO:0055114 oxidation-reduction process	GO:0046872 metal ion binding | GO:0016705 oxidoreductase activity, acting on paired donors, with incorporation or reduction of molecular oxygen | GO:0097159 organic cyclic compound binding | GO:1901363 heterocyclic compound binding	--
CGLO_13772	4420.39	1041.52	-2.08548	Down	0.000477931	1395	EQB47118	gi|530464870|gb|EQB47118.1|	homogentisate 1,2-dioxygenase [Colletotrichum gloeosporioides Cg-14]	val:VDBG_09257	homogentisate 1,2-dioxygenase; K00451 homogentisate 1,2-dioxygenase [EC:1.13.11.5]	GO:0006559 L-phenylalanine catabolic process | GO:0055114 oxidation-reduction process | GO:0006570 tyrosine metabolic process	GO:0004411 homogentisate 1,2-dioxygenase activity	--
CGLO_15153	910.192	368.494	-1.30453	Down	0.0072132	1815	EQB45894	gi|530463142|gb|EQB45894.1|	GMC oxidoreductase [Colletotrichum gloeosporioides Cg-14]	mpr:MPER_12409	hypothetical protein ; K00108 choline dehydrogenase [EC:1.1.99.1]	GO:0055114 oxidation-reduction process	GO:0050660 flavin adenine dinucleotide binding | GO:0016614 oxidoreductase activity, acting on CH-OH group of donors	--
CGLO_08582	279.876	89.857	-1.63908	Down	0.000172107	1749	EQB51839	gi|530470959|gb|EQB51839.1|	GMC oxidoreductase [Colletotrichum gloeosporioides Cg-14]	bcom:BAUCODRAFT_24578	hypothetical protein; K01908 propionyl-CoA synthetase [EC:6.2.1.17]	GO:0055114 oxidation-reduction process	GO:0050660 flavin adenine dinucleotide binding | GO:0016614 oxidoreductase activity, acting on CH-OH group of donors	--
CGLO_06405	69.0782	17.4633	-1.98391	Down	0.000857853	2244	EQB53832	gi|530473386|gb|EQB53832.1|	GMC oxidoreductase [Colletotrichum gloeosporioides Cg-14]	fgr:FGSG_04872	hypothetical protein; K19069 cellobiose dehydrogenase (acceptor) [EC:1.1.99.18]	GO:0055114 oxidation-reduction process	GO:0050660 flavin adenine dinucleotide binding | GO:0016614 oxidoreductase activity, acting on CH-OH group of donors	--
CGLO_16502	23.2499	3.2885	-2.82172	Down	0.000274864	1653	EQB44723	gi|530461658|gb|EQB44723.1|	cysteine synthase K/M:Cysteine synthase B [Colletotrichum gloeosporioides Cg-14]	afm:AFUA_4G03930	cysteine synthase B; K01738 cysteine synthase A [EC:2.5.1.47]	--	--	--
CGLO_15412	87.2574	17.6748	-2.30359	Down	1.70602e-06	2427	EQB45673	gi|530462856|gb|EQB45673.1|	GMC oxidoreductase [Colletotrichum gloeosporioides Cg-14]	nhe:NECHADRAFT_37056	hypothetical protein; K19069 cellobiose dehydrogenase (acceptor) [EC:1.1.99.18]	GO:0098869 cellular oxidant detoxification | GO:0006979 response to oxidative stress | GO:0055114 oxidation-reduction process	GO:0050660 flavin adenine dinucleotide binding | GO:0005506 iron ion binding | GO:0020037 heme binding | GO:0016705 oxidoreductase activity, acting on paired donors, with incorporation or reduction of molecular oxygen | GO:0004601 peroxidase activity | GO:0016614 oxidoreductase activity, acting on CH-OH group of donors	--
CGLO_01030	1153.8	318.642	-1.85638	Down	9.15194e-10	321	EQB58700	gi|596683534|ref|XP_007279307.1|	glutaredoxin [Colletotrichum gloeosporioides Nara gc5] >gi|429856678|gb|ELA31575.1| glutaredoxin [Colletotrichum gloeosporioides Nara gc5] >gi|530479525|gb|EQB58700.1| glutaredoxin [Colletotrichum gloeosporioides Cg-14]	nhe:NECHADRAFT_73925	hypothetical protein; K03676 glutaredoxin 3	GO:0019430 removal of superoxide radicals | GO:0045454 cell redox homeostasis | GO:0055114 oxidation-reduction process	GO:0009055 electron carrier activity | GO:0015038 glutathione disulfide oxidoreductase activity | GO:0015035 protein disulfide oxidoreductase activity	GO:0005634 nucleus | GO:0005829 cytosol
CGLO_00871	1659.63	25.4681	-6.02603	Down	1.7904e-74	1758	EQB58825	gi|530479679|gb|EQB58825.1|	CobW/HypB/UreG [Colletotrichum gloeosporioides Cg-14]	ani:AN2812.2	hypothetical protein; K14640 solute carrier family 20 (sodium-dependent phosphate transporter)	--	--	--
CGLO_05580	19.2564	49.852	1.37231	Up	0.0234462	921	EQB54567	gi|530474314|gb|EQB54567.1|	coagulation factor 5/8 type domain-containing protein [Colletotrichum gloeosporioides Cg-14]	mtm:MYCTH_2109123	hypothetical protein; K15634 probable phosphoglycerate mutase [EC:5.4.2.12]	--	--	--
CGLO_07573	50.229	437.293	3.12201	Up	3.72367e-17	1578	EQB52767	gi|530472103|gb|EQB52767.1|	ceramide glucosyltransferase [Colletotrichum gloeosporioides Cg-14]	vda:VDAG_09365	ceramide glucosyltransferase; K00720 ceramide glucosyltransferase [EC:2.4.1.80]	GO:0008152 metabolic process	GO:0016740 transferase activity	GO:0016021 integral component of membrane
CGLO_04552	4944.24	1995.11	-1.30928	Down	0.00485501	600	EQB55509	gi|530475443|gb|EQB55509.1|	cell wall protein PhiA [Colletotrichum gloeosporioides Cg-14]	--	--	--	--	--
CGLO_01678	929.623	2314.22	1.31581	Up	0.0035524	2583	EQB58116	gi|596708245|ref|XP_007283903.1|	carnitine acetyl transferase [Colletotrichum gloeosporioides Nara gc5] >gi|429851909|gb|ELA27068.1| carnitine acetyl transferase [Colletotrichum gloeosporioides Nara gc5] >gi|530478813|gb|EQB58116.1| choline/Carnitine O-acyltransferase [Colletotrichum gloeosporioides Cg-14]	tmn:UCRPA7_897	putative carnitine acetyl transferase protein; K00624 carnitine O-acetyltransferase [EC:2.3.1.7]	GO:0006066 alcohol metabolic process | GO:0009437 carnitine metabolic process	GO:0016746 transferase activity, transferring acyl groups	GO:0005739 mitochondrion
CGLO_17445	105.154	10.0647	-3.38514	Down	1.12104e-07	537	EQB43859	gi|530460558|gb|EQB43859.1|	carboxymuconolactone decarboxylase [Colletotrichum gloeosporioides Cg-14]	--	--	--	--	--
CGLO_17847	239.807	65.759	-1.86661	Down	0.000115767	1719	EQB43494	gi|530460080|gb|EQB43494.1|	carboxylesterase [Colletotrichum gloeosporioides Cg-14]	afm:AFUA_8G04210	triacylglycerol lipase; K01050 cholinesterase [EC:3.1.1.8]	GO:0008152 metabolic process	GO:0016787 hydrolase activity	--
CGLO_05002	158.597	423.908	1.41839	Up	0.0187618	2754	EQB55099	gi|530474949|gb|EQB55099.1|	calpain family cysteine protease [Colletotrichum gloeosporioides Cg-14]	--	--	GO:0006508 proteolysis	GO:0004198 calcium-dependent cysteine-type endopeptidase activity	GO:0005622 intracellular
CGLO_11364	60.5196	158.732	1.39112	Up	0.00189552	1875	EQB49331	gi|530467821|gb|EQB49331.1|	C6 zinc finger protein [Colletotrichum gloeosporioides Cg-14]	nhe:NECHADRAFT_68940	hypothetical protein; K01824 cholestenol Delta-isomerase [EC:5.3.3.5]	GO:0006357 regulation of transcription from RNA polymerase II promoter	GO:0000981 RNA polymerase II transcription factor activity, sequence-specific DNA binding | GO:0008270 zinc ion binding	GO:0005634 nucleus
CGLO_04222	11.0486	2.05868	-2.42407	Down	0.00283762	1008	EQB55815	gi|530475807|gb|EQB55815.1|	C6 zinc finger protein [Colletotrichum gloeosporioides Cg-14]	--	--	GO:0006357 regulation of transcription from RNA polymerase II promoter	GO:0000981 RNA polymerase II transcription factor activity, sequence-specific DNA binding | GO:0008270 zinc ion binding	GO:0005634 nucleus
CGLO_10244	664.041	305.428	-1.12044	Down	0.0067813	1752	EQB50330	gi|530469099|gb|EQB50330.1|	ferric reductase like transmembrane component [Colletotrichum gloeosporioides Cg-14]	afm:AFUA_7G04970	metalloreductase; K00521 ferric-chelate reductase [EC:1.16.1.7]	GO:0055114 oxidation-reduction process	GO:0016491 oxidoreductase activity	GO:0016021 integral component of membrane
CGLO_13990	10.4227	39.159	1.90962	Up	0.000923687	1188	EQB46931	gi|530464589|gb|EQB46931.1|	beta-lactamase [Colletotrichum gloeosporioides Cg-14]	ela:UCREL1_3838	putative myo-inositol transporter protein; K08150 MFS transporter, SP family, solute carrier family 2 (myo-inositol transporter), member 13	--	--	GO:0016020 membrane
CGLO_08210	215.984	54.6318	-1.98311	Down	0.00228043	1164	EQB52190	gi|530471402|gb|EQB52190.1|	beta-lactamase [Colletotrichum gloeosporioides Cg-14]	--	--	--	--	--
CGLO_03998	77.0013	21.5844	-1.83489	Down	0.00175184	2046	EQB56007	gi|530476049|gb|EQB56007.1|	beta-ketoacyl synthase domain-containing protein [Colletotrichum gloeosporioides Cg-14]	pcs:Pc21g12440	Pc21g12440; K15418 zearalenone synthase, highly reducing iterative type I polyketide synthase	GO:0008152 metabolic process	GO:0016740 transferase activity	--
CGLO_16530	333.719	113.707	-1.55332	Down	0.00255418	1446	EQB44686	gi|530461615|gb|EQB44686.1|	FAD dependent oxidoreductase [Colletotrichum gloeosporioides Cg-14]	nhe:NECHADRAFT_79853	hypothetical protein; K00306 sarcosine oxidase / L-pipecolate oxidase [EC:1.5.3.1 1.5.3.7]	GO:0055114 oxidation-reduction process	GO:0016491 oxidoreductase activity	--
CGLO_09515	16.032	47.5942	1.56984	Up	0.00462515	2112	EQB50994	gi|530469929|gb|EQB50994.1|	ATPase [Colletotrichum gloeosporioides Cg-14]	ela:UCREL1_7820	putative inositol oxygenase 1 protein; K00469 inositol oxygenase [EC:1.13.99.1]	--	GO:0005524 ATP binding	--
CGLO_02924	83.0923	34.6289	-1.26274	Down	0.0077227	1086	EQB57008	gi|530477457|gb|EQB57008.1|	ATP synthase F0 [Colletotrichum gloeosporioides Cg-14]	cmt:CCM_02900	short-chain dehydrogenase, putative; K06123 1-acylglycerone phosphate reductase [EC:1.1.1.101]	--	--	GO:0016021 integral component of membrane
CGLO_04556	1876.9	664.922	-1.4971	Down	1.83466e-08	1506	EQB55513	gi|530475447|gb|EQB55513.1|	aromatic amino acid aminotransferase [Colletotrichum gloeosporioides Cg-14]	cmt:CCM_05868	aromatic aminotransferase Aro8, putative; K00838 aromatic amino acid aminotransferase I [EC:2.6.1.57 2.6.1.27 2.6.1.5]	GO:0009058 biosynthetic process	GO:0030170 pyridoxal phosphate binding | GO:0008483 transaminase activity	--
CGLO_04385	254.486	754.696	1.56831	Up	0.0210917	1266	EQB55681	gi|530475647|gb|EQB55681.1|	aph phosphorylate [Colletotrichum gloeosporioides Cg-14]	--	--	GO:0008152 metabolic process	GO:0016740 transferase activity	--
CGLO_05295	11.5581	36.9341	1.67605	Up	0.0333802	1731	EQB54835	gi|530474641|gb|EQB54835.1|	AMP-binding enzyme [Colletotrichum gloeosporioides Cg-14]	afm:AFUA_1G13110	4-coumarate-CoA ligase; K01904 4-coumarate--CoA ligase [EC:6.2.1.12]	GO:0008152 metabolic process	GO:0016874 ligase activity	GO:0016020 membrane
CGLO_09939	26.7514	84.7977	1.66441	Up	0.031835	1395	EQB50613	gi|530469464|gb|EQB50613.1|	AMP-binding enzyme [Colletotrichum gloeosporioides Cg-14]	afm:AFUA_1G13110	4-coumarate-CoA ligase; K01904 4-coumarate--CoA ligase [EC:6.2.1.12]	GO:0008152 metabolic process	GO:0003824 catalytic activity	--
CGLO_07623	42.384	93.4956	1.14138	Up	0.0442771	1914	EQB52728	gi|530472049|gb|EQB52728.1|	AMP-binding enzyme [Colletotrichum gloeosporioides Cg-14]	pte:PTT_07901	hypothetical protein; K19951 TBC1 domain family member 8/9	GO:0008152 metabolic process	GO:0003824 catalytic activity	GO:0016021 integral component of membrane
CGLO_14862	111.275	222.582	1.00022	Up	0.0439421	2100	EQB46132	gi|530463460|gb|EQB46132.1|	AMP-binding enzyme [Colletotrichum gloeosporioides Cg-14]	tre:TRIREDRAFT_54870	propionyl-CoA synthase; K01908 propionyl-CoA synthetase [EC:6.2.1.17]	GO:0008152 metabolic process	GO:0003824 catalytic activity	--
CGLO_01573	2893.89	1292.85	-1.16245	Down	0.00342031	1893	EQB58206	gi|530478925|gb|EQB58206.1|	AMP-binding enzyme [Colletotrichum gloeosporioides Cg-14]	tdl:TDEL_0H04360	TDEL0H04360; acetate--CoA ligase; K01895 acetyl-CoA synthetase [EC:6.2.1.1]	GO:0000038 very long-chain fatty acid metabolic process | GO:0006633 fatty acid biosynthetic process | GO:0001676 long-chain fatty acid metabolic process | GO:0015909 long-chain fatty acid transport	GO:0005324 long-chain fatty acid transporter activity | GO:0004467 long-chain fatty acid-CoA ligase activity | GO:0031957 very long-chain fatty acid-CoA ligase activity	GO:0005777 peroxisome | GO:0005811 lipid particle | GO:0031235 intrinsic component of the cytoplasmic side of the plasma membrane | GO:0005783 endoplasmic reticulum
CGLO_04109	2102.18	532.097	-1.98213	Down	1.59034e-09	1443	EQB55909	gi|530475930|gb|EQB55909.1|	FAD dependent oxidoreductase [Colletotrichum gloeosporioides Cg-14]	--	--	GO:0055114 oxidation-reduction process	GO:0016491 oxidoreductase activity	--
CGLO_09903	102.773	46.5766	-1.14178	Down	0.00374718	1428	EQB50647	gi|374463136|gb|AEZ53114.1|	ammonium transporter [Colletotrichum gloeosporioides] >gi|530469505|gb|EQB50647.1| ammonium transporter [Colletotrichum gloeosporioides Cg-14]	pan:PODANSg2249	hypothetical protein; K03320 ammonium transporter, Amt family	GO:0072488 ammonium transmembrane transport	GO:0008519 ammonium transmembrane transporter activity	GO:0016021 integral component of membrane
CGLO_06070	28.8306	117.981	2.03288	Up	0.000220145	1584	EQB54120	gi|530473753|gb|EQB54120.1|	amino acid permease [Colletotrichum gloeosporioides Cg-14]	mgr:MGG_08670	choline transporter; K19564 choline transport protein	GO:0003333 amino acid transmembrane transport	GO:0015171 amino acid transmembrane transporter activity	GO:0016021 integral component of membrane
CGLO_17961	17.1077	51.4514	1.58857	Up	0.00246596	1665	EQB43384	gi|530459937|gb|EQB43384.1|	amino acid permease [Colletotrichum gloeosporioides Cg-14]	ela:UCREL1_10075	putative proline permease protein; K16261 yeast amino acid transporter	GO:0003333 amino acid transmembrane transport	GO:0015171 amino acid transmembrane transporter activity	GO:0016021 integral component of membrane
CGLO_14386	31.8992	158.697	2.31468	Up	5.42786e-10	7545	EQB46557	gi|530464068|gb|EQB46557.1|	amino acid adenylation domain-containing protein [Colletotrichum gloeosporioides Cg-14]	pcs:Pc21g15480	Pc21g15480; K18281 brevianamide F synthase	GO:0008152 metabolic process	GO:0003824 catalytic activity	--
CGLO_13427	99.7767	49.8532	-1.00102	Down	0.0319167	1590	EQB47417	gi|530465296|gb|EQB47417.1|	FAD binding domain-containing protein [Colletotrichum gloeosporioides Cg-14]	pbn:PADG_12043	PADG_06140, PADG_06141; cysteine desulfurase, mitochondrial; K04487 cysteine desulfurase [EC:2.8.1.7]	GO:0055114 oxidation-reduction process	GO:0050660 flavin adenine dinucleotide binding | GO:0016614 oxidoreductase activity, acting on CH-OH group of donors	--
CGLO_12289	23.4056	119.966	2.3577	Up	0.0011814	459	EQB48478	gi|530466723|gb|EQB48478.1|	amidohydrolase [Colletotrichum gloeosporioides Cg-14]	--	--	GO:0008152 metabolic process	GO:0016810 hydrolase activity, acting on carbon-nitrogen (but not peptide) bonds	--
CGLO_15105	82.2113	278.35	1.75949	Up	0.000107763	1659	EQB45937	gi|530463201|gb|EQB45937.1|	amidohydrolase [Colletotrichum gloeosporioides Cg-14]	--	--	GO:0008152 metabolic process	GO:0016810 hydrolase activity, acting on carbon-nitrogen (but not peptide) bonds	--
CGLO_03770	24.0978	64.5078	1.42057	Up	0.0195393	1500	EQB56233	gi|530476313|gb|EQB56233.1|	amidohydrolase [Colletotrichum gloeosporioides Cg-14]	maj:MAA_01137	guanine deaminase; K01487 guanine deaminase [EC:3.5.4.3]	GO:0008152 metabolic process	GO:0016810 hydrolase activity, acting on carbon-nitrogen (but not peptide) bonds	--
CGLO_00617	59.3409	187.766	1.66183	Up	6.53711e-05	1680	EQB59057	gi|530479964|gb|EQB59057.1|	amidase [Colletotrichum gloeosporioides Cg-14]	tmn:UCRPA7_5677	putative glutamyl-trna amidotransferase subunit a protein; K01426 amidase [EC:3.5.1.4]	GO:0008152 metabolic process	GO:0016884 carbon-nitrogen ligase activity, with glutamine as amido-N-donor | GO:0016740 transferase activity	--
CGLO_17877	204.229	4234.29	4.37386	Up	4.98443e-22	978	EQB43464	gi|530460043|gb|EQB43464.1|	alpha/beta hydrolase [Colletotrichum gloeosporioides Cg-14]	bsc:COCSADRAFT_164648	hypothetical protein; K01259 proline iminopeptidase [EC:3.4.11.5]	GO:0008152 metabolic process	GO:0016787 hydrolase activity	--
CGLO_07445	5394.08	1665.33	-1.69557	Down	6.89257e-05	1593	EQB52901	gi|530472260|gb|EQB52901.1|	alpha amylase [Colletotrichum gloeosporioides Cg-14]	mtm:MYCTH_77082	glycoside hydrolase family 13 protein; K01176 alpha-amylase [EC:3.2.1.1]	GO:0016052 carbohydrate catabolic process	GO:0004556 alpha-amylase activity | GO:0005509 calcium ion binding	--
CGLO_12351	155.202	636.778	2.03664	Up	0.0208644	1233	EQB48415	gi|530466642|gb|EQB48415.1|	aldose 1-epimerase [Colletotrichum gloeosporioides Cg-14]	tmn:UCRPA7_5132	putative aldose 1-epimerase protein; K01785 aldose 1-epimerase [EC:5.1.3.3]	GO:0005975 carbohydrate metabolic process	GO:0030246 carbohydrate binding | GO:0016853 isomerase activity	--
CGLO_16402	1770.02	589.777	-1.58553	Down	0.00707716	1527	EQB44803	gi|530461768|gb|EQB44803.1|	FAD binding domain-containing protein [Colletotrichum gloeosporioides Cg-14]	--	--	GO:0055114 oxidation-reduction process	GO:0050660 flavin adenine dinucleotide binding | GO:0016614 oxidoreductase activity, acting on CH-OH group of donors	--
CGLO_03597	75.162	24.5598	-1.6137	Down	0.000462476	996	EQB56395	gi|530476510|gb|EQB56395.1|	aldo/keto reductase [Colletotrichum gloeosporioides Cg-14]	vda:VDAG_03228	pyridoxal reductase; K05275 pyridoxine 4-dehydrogenase [EC:1.1.1.65]	--	--	--
CGLO_05856	8.69869	1.82834	-2.25026	Down	0.00767891	1038	EQB54318	gi|530474002|gb|EQB54318.1|	aldo/keto reductase [Colletotrichum gloeosporioides Cg-14]	pgr:PGTG_03883	hypothetical protein; K05275 pyridoxine 4-dehydrogenase [EC:1.1.1.65]	--	--	--
CGLO_14502	887.026	223.118	-1.99117	Down	3.91585e-06	1611	EQB46441	gi|530463904|gb|EQB46441.1|	FAD binding domain-containing protein [Colletotrichum gloeosporioides Cg-14]	--	--	GO:0055114 oxidation-reduction process	GO:0016491 oxidoreductase activity	--
CGLO_07948	5402.8	387.628	-3.80096	Down	3.59772e-24	1743	EQB52432	gi|530471685|gb|EQB52432.1|	FAD binding domain-containing protein [Colletotrichum gloeosporioides Cg-14]	ssl:SS1G_10951	hypothetical protein; K01501 nitrilase [EC:3.5.5.1]	GO:0055114 oxidation-reduction process	GO:0050660 flavin adenine dinucleotide binding | GO:0016614 oxidoreductase activity, acting on CH-OH group of donors	--
CGLO_00757	399.337	132.093	-1.59605	Down	0.000257831	1473	EQB58913	gi|530479790|gb|EQB58913.1|	cytochrome P450 [Colletotrichum gloeosporioides Cg-14]	ani:AN7818.2	STCF_EMENI Probable sterigmatocystin biosynthesis P450 monooxygenase STCF (Cytochrome P450 60A2); K17645 averantin hydroxylase [EC:1.14.13.174]	GO:0055114 oxidation-reduction process	GO:0020037 heme binding | GO:0016705 oxidoreductase activity, acting on paired donors, with incorporation or reduction of molecular oxygen | GO:0004497 monooxygenase activity | GO:0005506 iron ion binding	--
CGLO_17711	353447	124704	-1.50298	Down	1.70602e-06	927	EQB43622	gi|596684777|ref|XP_007279540.1|	c-4 methylsterol oxidase [Colletotrichum gloeosporioides Nara gc5] >gi|429856510|gb|ELA31416.1| c-4 methylsterol oxidase [Colletotrichum gloeosporioides Nara gc5]	tmn:UCRPA7_7900	putative c-4 sterol methyl oxidase protein; K07750 methylsterol monooxygenase [EC:1.14.13.72]	GO:0006633 fatty acid biosynthetic process | GO:0055114 oxidation-reduction process	GO:0016491 oxidoreductase activity | GO:0005506 iron ion binding	GO:0016021 integral component of membrane
CGLO_03039	270.131	109.907	-1.29738	Down	1.482e-05	1548	EQB56924	gi|530477347|gb|EQB56924.1|	benzoate 4-monooxygenase cytochrome P450 [Colletotrichum gloeosporioides Cg-14]	psq:PUNSTDRAFT_101387	cytochrome P450; K07824 benzoate 4-monooxygenase [EC:1.14.13.12]	GO:0055114 oxidation-reduction process	GO:0020037 heme binding | GO:0016705 oxidoreductase activity, acting on paired donors, with incorporation or reduction of molecular oxygen | GO:0004497 monooxygenase activity | GO:0005506 iron ion binding	GO:0016021 integral component of membrane
CGLO_14735	2264.13	734.287	-1.62454	Down	4.87548e-05	3792	EQB46242	gi|530463610|gb|EQB46242.1|	AMP-binding enzyme [Colletotrichum gloeosporioides Cg-14]	cput:CONPUDRAFT_168209	alpha-aminoadipate reductase Lys1p; K00143 L-aminoadipate-semialdehyde dehydrogenase [EC:1.2.1.31]	GO:0055114 oxidation-reduction process	GO:0016491 oxidoreductase activity	--
CGLO_14291	3367.86	1682.87	-1.00091	Down	0.0018229	1230	EQB46659	gi|530464207|gb|EQB46659.1|	acyltransferase [Colletotrichum gloeosporioides Cg-14]	ani:AN8838.2	hypothetical protein; K15176 RNA polymerase-associated protein CTR9	GO:0008152 metabolic process	GO:0016746 transferase activity, transferring acyl groups	GO:0016021 integral component of membrane | GO:0005783 endoplasmic reticulum
CGLO_17960	1754.13	6355.76	1.85731	Up	2.72091e-06	813	EQB43383	gi|530459936|gb|EQB43383.1|	acetyltransferase [Colletotrichum gloeosporioides Cg-14]	npa:UCRNP2_5654	putative phenylacetate 2-hydroxylase protein; K10437 phenylacetate 2-hydroxylase [EC:1.14.13.-]	GO:0008152 metabolic process	GO:0008080 N-acetyltransferase activity	--
CGLO_05207	14.8954	53.6508	1.84873	Up	0.000190546	744	EQB54894	gi|530474706|gb|EQB54894.1|	acetyltransferase [Colletotrichum gloeosporioides Cg-14]	--	--	GO:0008152 metabolic process	GO:0008080 N-acetyltransferase activity	--
CGLO_11122	24.41	86.635	1.82748	Up	0.000832143	585	EQB49530	gi|530468085|gb|EQB49530.1|	acetyltransferase [Colletotrichum gloeosporioides Cg-14]	--	--	GO:0008152 metabolic process	GO:0008080 N-acetyltransferase activity	--
CGLO_02930	43.4136	127.2	1.55088	Up	2.14533e-05	786	EQB57003	gi|530477450|gb|EQB57003.1|	acetyltransferase [Colletotrichum gloeosporioides Cg-14]	bze:COCCADRAFT_84955	hypothetical protein; K15361 WD repeat-containing protein 48	GO:0008152 metabolic process	GO:0008080 N-acetyltransferase activity	--
CGLO_15618	231.823	526.285	1.18282	Up	0.000425045	948	EQB45499	gi|530462645|gb|EQB45499.1|	acetyltransferase [Colletotrichum gloeosporioides Cg-14]	vda:VDAG_00787	hypothetical protein; K10610 DNA damage-binding protein 1	GO:0008152 metabolic process	GO:0008080 N-acetyltransferase activity	--
CGLO_04688	68.8408	151.113	1.13429	Up	0.00746992	621	EQB55389	gi|530475297|gb|EQB55389.1|	acetyltransferase [Colletotrichum gloeosporioides Cg-14]	npa:UCRNP2_5654	putative phenylacetate 2-hydroxylase protein; K10437 phenylacetate 2-hydroxylase [EC:1.14.13.-]	GO:0006357 regulation of transcription from RNA polymerase II promoter	GO:0008270 zinc ion binding | GO:0000981 RNA polymerase II transcription factor activity, sequence-specific DNA binding | GO:0003677 DNA binding | GO:0008080 N-acetyltransferase activity	GO:0005634 nucleus
CGLO_08065	10069	3218.62	-1.64541	Down	0.000142382	3846	EQB52336	gi|530471568|gb|EQB52336.1|	ABC-2 type transporter [Colletotrichum gloeosporioides Cg-14]	cne:CNB05770	xenobiotic-transporting ATPase; K08711 ATP-binding cassette, subfamily G (WHITE), member 2, PDR	GO:0055085 transmembrane transport | GO:0008152 metabolic process	GO:0042626 ATPase activity, coupled to transmembrane movement of substances | GO:0005524 ATP binding	GO:0016021 integral component of membrane
CGLO_01284	950.073	281.818	-1.75327	Down	6.89257e-05	627	EQB58454	gi|530479217|gb|EQB58454.1|	ABC-2 type transporter [Colletotrichum gloeosporioides Cg-14]	cne:CNB05770	xenobiotic-transporting ATPase; K08711 ATP-binding cassette, subfamily G (WHITE), member 2, PDR	GO:0055085 transmembrane transport | GO:0008152 metabolic process	GO:0042626 ATPase activity, coupled to transmembrane movement of substances | GO:0005524 ATP binding	GO:0016021 integral component of membrane
CGLO_02230	210.328	474.066	1.17245	Up	2.72703e-05	3429	EQB57615	gi|530478217|gb|EQB57615.1|	ABC transporter [Colletotrichum gloeosporioides Cg-14]	adl:AURDEDRAFT_92909	P-loop containing nucleoside triphosphate hydrolase protein; K05665 ATP-binding cassette, subfamily C (CFTR/MRP), member 1	GO:0055085 transmembrane transport | GO:0008152 metabolic process	GO:0042626 ATPase activity, coupled to transmembrane movement of substances | GO:0005524 ATP binding	GO:0016021 integral component of membrane
CGLO_09445	1227.45	2670.37	1.12138	Up	0.00464349	4686	EQB51060	gi|530470010|gb|EQB51060.1|	ABC transporter [Colletotrichum gloeosporioides Cg-14]	adl:AURDEDRAFT_92909	P-loop containing nucleoside triphosphate hydrolase protein; K05665 ATP-binding cassette, subfamily C (CFTR/MRP), member 1	GO:0055085 transmembrane transport | GO:0008152 metabolic process	GO:0042626 ATPase activity, coupled to transmembrane movement of substances | GO:0005524 ATP binding	GO:0016021 integral component of membrane
CGLO_06823	25.837	3.46598	-2.8981	Down	1.35395e-05	1419	EQB53453	gi|530472940|gb|EQB53453.1|	amine oxidase [Colletotrichum gloeosporioides Cg-14]	aor:AOR_1_4014	AO090026000003; FAD dependent oxidoreductase; K15393 beta-cyclopiazonate dehydrogenase [EC:1.21.99.1]	GO:0055114 oxidation-reduction process	GO:0016491 oxidoreductase activity	--
CGLO_16889	287.589	734.781	1.35331	Up	0.00137548	1230	EQB44363	gi|530461195|gb|EQB44363.1|	5-methyltetrahydropteroyltriglutamate-homocysteine methyltransferase [Colletotrichum gloeosporioides Cg-14]	pan:PODANSg1310	hypothetical protein; K00549 5-methyltetrahydropteroyltriglutamate--homocysteine methyltransferase [EC:2.1.1.14]	GO:0009086 methionine biosynthetic process | GO:0032259 methylation	GO:0008270 zinc ion binding | GO:0003871 5-methyltetrahydropteroyltriglutamate-homocysteine S-methyltransferase activity	--
CGLO_15415	3806.17	1514.75	-1.32926	Down	0.0311532	552	EQB45676	gi|596694642|ref|XP_007281407.1|	3-oxoacyl-acyl-carrier-protein synthase [Colletotrichum gloeosporioides Nara gc5] >gi|429854536|gb|ELA29544.1| 3-oxoacyl-acyl-carrier-protein synthase [Colletotrichum gloeosporioides Nara gc5]	mgr:MGG_13563	hypothetical protein; K09983 uncharacterized protein	--	--	--
CGLO_03850	88.7664	10.532	-3.07524	Down	6.06603e-06	1047	EQB56156	gi|530476225|gb|EQB56156.1|	alcohol dehydrogenase GroES-like domain-containing protein [Colletotrichum gloeosporioides Cg-14]	afm:AFUA_8G01420	quinone oxidoreductase; K00344 NADPH2:quinone reductase [EC:1.6.5.5]	GO:0055114 oxidation-reduction process	GO:0008270 zinc ion binding | GO:0016491 oxidoreductase activity	--
CGLO_10683	268.2	100.917	-1.41014	Down	0.000464003	2049	EQB49919	gi|530468580|gb|EQB49919.1|	ABC transporter [Colletotrichum gloeosporioides Cg-14]	dsq:DICSQDRAFT_110500	hypothetical protein; K05661 ATP-binding cassette, subfamily B (MDR/TAP), member 6	GO:0055085 transmembrane transport | GO:0055114 oxidation-reduction process	GO:0042626 ATPase activity, coupled to transmembrane movement of substances | GO:0016491 oxidoreductase activity | GO:0005524 ATP binding | GO:0071949 FAD binding	GO:0016021 integral component of membrane
